# Supplementary material for: Surviving without oxygen involves major tissue specific changes in the proteome of crucian carp (Carassius carassius)
Source: PeerJ. 2023 Mar 8;11:e14890. doi: 10.7717/peerj.14890 (PMC10007964; doi:10.7717/peerj.14890)
Supplement: File S1 — Label-free quantitation, data processing, statistical analyses and complete list of significant proteins in brain tissue. [file peerj-11-14890-s001.xlsx]

## Sheet: PEAKS_LFQ
Output from label-free quantitation in PEAKS +
Duplicated protein groups were removed.
Protein Group	Protein ID	Accession	Significance	Coverage (%)	#Peptides	#Unique	PTM	Sample 1 Area	Sample 4 Area	Sample 7 Area	Sample 10 Area	Sample 13 Area	Sample 2 Area	Sample 5 Area	Sample 8 Area	Sample 14 Area	Sample 17 Area	Sample 6 Area	Sample 9 Area	Sample 12 Area	Sample 15 Area	Sample 18 Area	Sample 1 Area (top-3 peptides)	Sample 4 Area (top-3 peptides)	Sample 7 Area (top-3 peptides)	Sample 10 Area (top-3 peptides)	Sample 13 Area (top-3 peptides)	Sample 2 Area (top-3 peptides)	Sample 5 Area (top-3 peptides)	Sample 8 Area (top-3 peptides)	Sample 14 Area (top-3 peptides)	Sample 17 Area (top-3 peptides)	Sample 6 Area (top-3 peptides)	Sample 9 Area (top-3 peptides)	Sample 12 Area (top-3 peptides)	Sample 15 Area (top-3 peptides)	Sample 18 Area (top-3 peptides)	B_Normoxia Area	B_Anoxia Area	B_Reoxygenation Area	B_Normoxia Area (top-3 peptides)	B_Anoxia Area (top-3 peptides)	B_Reoxygenation Area (top-3 peptides)	Avg. Mass	Description
1	131	XP_026052287.1	2.04	6	9	9	Oxidation (M)	187410000	166820000	171590000	171500000	187800000	176620000	195230000	224820000	185500000	137950000	191520000	198220000	170310000	101950000	131390000	141710000	110710000	131080000	81781000	103330000	131670000	121170000	155380000	109300000	93287000	138790000	135340000	84983000	74316000	98698000	180370000	187870000	167900000	113880000	122270000	107920000	285241	spectrin alpha chain non-erythrocytic 1 isoform X2 [Carassius auratus]
2	99	XP_026102380.1	7.11	4	6	6		54495000	56641000	37465000	121360000	82665000	43987000	44557000	47483000	49869000	34102000	43882000	19427000	51684000	47927000	32319000	43376000	46468000	27771000	96264000	65294000	35380000	37445000	37502000	40341000	25272000	35537000	15690000	43798000	33332000	22944000	71744000	44347000	41533000	56524000	35188000	32054000	185491	LOW QUALITY PROTEIN: spectrin alpha chain non-erythrocytic 1-like [Carassius auratus]
3	148	XP_026077456.1	2.13	13	21	21	Carbamidomethylation; Acetylation (Protein N-term)	273880000	287680000	315710000	422410000	355320000	327700000	292040000	306110000	317660000	368090000	333180000	333110000	267300000	410710000	426170000	99627000	152180000	160400000	142210000	128980000	172010000	133890000	145420000	134900000	166140000	148170000	140510000	128950000	144570000	158220000	351640000	334170000	379590000	136840000	150650000	144240000	271758	spectrin beta chain non-erythrocytic 1 isoform X1 [Carassius auratus]
4	161	XP_026130644.1	1.68	12	19	19	Carbamidomethylation; Acetylation (Protein N-term)	160110000	116350000	138700000	177710000	169250000	134470000	134600000	122580000	149890000	162850000	147840000	165390000	135890000	187590000	168010000	50666000	37293000	63441000	96013000	54079000	46652000	42965000	58899000	52947000	76427000	55526000	67815000	37594000	87023000	98418000	163100000	144490000	168710000	66288000	55880000	69275000	272283	spectrin beta chain non-erythrocytic 1-like isoform X2 [Carassius auratus]
5	183	XP_026084568.1	10.18	26	18	18	Carbamidomethylation; Oxidation (M)	1339300000	924530000	572230000	930250000	1267000000	1217500000	1227700000	494960000	1381700000	972680000	1128700000	1346900000	1442300000	1402400000	1179100000	898590000	458190000	319080000	380790000	564600000	734250000	669340000	169470000	756050000	490650000	687980000	764010000	740240000	935180000	755230000	1038600000	1079500000	1318300000	525150000	564480000	777510000	113074	sodium/potassium-transporting ATPase subunit alpha-3-like [Carassius auratus]
6	249	XP_026073521.1	9.23	22	19	19	Carbamidomethylation	1635900000	1649000000	1380900000	1858900000	1935800000	1524700000	1373100000	1136400000	1702300000	1339600000	1371500000	1585200000	1452300000	1906400000	1310200000	913510000	974820000	896460000	1145700000	1147600000	879360000	701660000	781580000	1056500000	797710000	767510000	949400000	839660000	1018000000	783360000	1699900000	1436700000	1595400000	1015600000	843360000	871580000	113049	sodium/potassium-transporting ATPase subunit alpha-1 [Carassius auratus]
7	193	XP_026088301.1	2.07	7	5	5	Carbamidomethylation	194060000	103010000	69687000	149310000	161340000	106740000	88860000	81232000	116810000	134770000	89558000	83340000	90567000	202830000	90807000	84749000	90988000	56169000	129700000	138060000	78614000	69396000	69078000	95462000	103330000	69453000	59547000	76912000	123510000	67069000	185720000	110500000	144030000	99933000	83175000	79738000	112576	sodium/potassium-transporting ATPase subunit alpha-3-like [Carassius auratus]
8	170	XP_026138366.1	0.4	5	4	4		22207000	34062000	23665000	24558000	21200000	24345000	24002000	34207000	23447000	19115000	20777000	35822000	37990000	13498000	17528000	22207000	32422000	23665000	24032000	18647000	24345000	22457000	30582000	20393000	19115000	19827000	31954000	33340000	13498000	17528000	25768000	26120000	27705000	24194000	23378000	24548000	191595	clathrin heavy chain 1-like isoform X4 [Carassius auratus]
9	189	XP_026075645.1	0.16	7	6	6		33220000	43555000	30194000	28511000	50810000	36001000	41553000	43580000	42531000	19561000	35543000	44306000	60552000	28482000	11874000	26456000	30391000	25160000	20942000	39937000	26535000	31649000	34204000	33946000	18972000	26549000	32468000	49299000	27061000	11000000	38207000	38380000	38412000	28577000	29061000	29276000	191807	clathrin heavy chain 1-like isoform X2 [Carassius auratus]
10	167	XP_026081921.1	1.97	4	3	3		22438000	13047000	20014000	10377000	18276000	21090000	21304000	20901000	15144000	14315000	15940000	20981000	23154000	10317000	11195000	22438000	13047000	20014000	10377000	18276000	21090000	21304000	20901000	15144000	14315000	15940000	20981000	23154000	10317000	11195000	17477000	20968000	21294000	17477000	20968000	21294000	191604	clathrin heavy chain 1 isoform X4 [Carassius auratus]
11	25	XP_026106796.1	11.89	15	4	4	Oxidation (M)	784180000	599130000	624690000	940500000	854990000	650010000	481500000	516130000	662610000	684530000	598600000	591420000	676750000	1002900000	620180000	706210000	565000000	559570000	760920000	728410000	555190000	384290000	410870000	512220000	581410000	518310000	475700000	423410000	962960000	569050000	775350000	620350000	742620000	675140000	497280000	614970000	55098	ATP synthase subunit beta mitochondrial-like [Carassius auratus]
12	208	XP_026118143.1	2.2	7	7	7	Carbamidomethylation	22334000	29385000	16015000	20911000	46846000	11472000	35401000	23383000	27741000	14007000	24809000	32697000	34308000	21779000	12517000	17097000	16081000	11957000	11483000	33466000	3589100	22794000	14389000	15510000	12096000	16478000	19807000	17349000	20892000	11287000	30748000	29576000	27505000	21666000	20468000	18212000	191836	clathrin heavy chain 1-like isoform X4 [Carassius auratus]
13	228	XP_026060528.1	6.88	11	10	10	Carbamidomethylation	154860000	195780000	142530000	165560000	173130000	225450000	201600000	118050000	211830000	141760000	199290000	233670000	247120000	147340000	151720000	88261000	117520000	114740000	124700000	108080000	150960000	113320000	86509000	136020000	108970000	123010000	155230000	116860000	120830000	132230000	168260000	184400000	203470000	110660000	123160000	133850000	113521	sodium/potassium-transporting ATPase subunit alpha-1 isoform X1 [Carassius auratus]
14	46	XP_026136026.1	3.71	9	1	1		770950000	125250000	308480000	271680000	355630000	565790000	220830000	90675000	444410000	439280000	490680000	588540000	153380000	1097400000	1076600000	770950000	125250000	308480000	271680000	355630000	565790000	220830000	90675000	444410000	439280000	490680000	588540000	153380000	1097400000	1076600000	366400000	352200000	681320000	366400000	352200000	681320000	49773	tubulin beta-4B chain-like [Carassius auratus]
15	39	XP_026076820.1	8.92	11	2	2	Oxidation (M)	30534000	16991000	553920	80210000	59946000	45773000	43858000	44732000	54691000	31094000	39931000	36436000	7988500	6226100	19141000	30534000	16991000	553920	80210000	59946000	45773000	43858000	44732000	54691000	31094000	39931000	36436000	7988500	6226100	19141000	39524000	50476000	33412000	39524000	50476000	33412000	55165	ATP synthase subunit beta mitochondrial [Carassius auratus]
16	261	XP_026140358.1	2.53	2	1	1	Carbamidomethylation	59318000	3559800	44768000	13220000	77063000	50041000	0	31499000	40170000	956970	0	0	17683000	115190000	63652000	59318000	3559800	44768000	13220000	77063000	50041000	0	31499000	40170000	956970	0	0	17683000	115190000	63652000	63354000	32929000	73750000	63354000	32929000	73750000	112850	sodium/potassium-transporting ATPase subunit alpha-3 isoform X1 [Carassius auratus]
17	36	XP_026142731.1	85.01	7	1	1	Carbamidomethylation	0	0	0	0	0	0	0	0	0	0	1422900	3577600	0	1666000	3935700	0	0	0	0	0	0	0	0	0	0	1422900	3577600	0	1666000	3935700	0	0	2650500	0	0	2650500	58220	pyruvate kinase PKM-like isoform X2 [Carassius auratus]
18	30	XP_026142749.1	1.41	10	3	3	Carbamidomethylation	153530000	65918000	235370000	137110000	112790000	108100000	53068000	69414000	76839000	314660000	84721000	83435000	57302000	389370000	469090000	146760000	60092000	233380000	136970000	107420000	103120000	47774000	66972000	69801000	311640000	80139000	80432000	50258000	384510000	467010000	162680000	136970000	233640000	158660000	132420000	229320000	58233	pyruvate kinase PKM-like isoform X5 [Carassius auratus]
19	48	XP_026067457.1	1.34	10	3	3		112050000	73820000	61358000	83019000	81022000	85053000	79195000	38785000	82130000	90014000	81438000	81033000	65922000	118000000	91233000	100080000	71445000	51559000	75900000	75719000	80372000	78530000	36353000	79214000	77261000	78051000	77615000	65366000	91864000	74014000	82254000	75035000	87525000	74940000	70346000	77382000	49815	tubulin beta-4B chain [Carassius auratus]
20	14	XP_026070191.1	9.07	11	3	3	Carbamidomethylation	132250000	324100000	158760000	225260000	451240000	298160000	453040000	369160000	514210000	281780000	347370000	381670000	610950000	362840000	361930000	132250000	286420000	158760000	187050000	406800000	276940000	411660000	337210000	457940000	281780000	318470000	350990000	522600000	336560000	361930000	336810000	390810000	421660000	296710000	353110000	378110000	50034	tubulin alpha chain [Carassius auratus]
21	285	XP_026119333.1	2.22	29	90	90	Carbamidomethylation	365450000	359570000	298560000	365350000	396320000	402010000	397340000	307260000	392530000	246460000	367710000	391110000	447640000	279530000	263510000	64663000	45045000	49103000	27993000	36163000	59051000	45927000	39498000	48492000	44160000	42981000	51323000	37513000	41168000	43135000	383250000	369180000	374880000	44593000	47426000	43224000	533319	LOW QUALITY PROTEIN: cytoplasmic dynein 1 heavy chain 1-like [Carassius auratus]
22	300	XP_026119172.1	3.34	9	6	6	Carbamidomethylation	74980000	57126000	59031000	55944000	69913000	80994000	62652000	50495000	95503000	67785000	69975000	77254000	77161000	70029000	54008000	60980000	45528000	49213000	40389000	54391000	66240000	48182000	44570000	82066000	55684000	54844000	65055000	64408000	53316000	42679000	64192000	72870000	71444000	50100000	59348000	56591000	113325	sodium/potassium-transporting ATPase subunit alpha-1-like [Carassius auratus]
23	75	XP_026142745.1	2.74	2	1	1	Carbamidomethylation	0	3633800	930950	4016000	4972300	1633100	0	1421400	2843000	14401	2959500	1708700	3723400	3570400	1841100	0	3633800	930950	4016000	4972300	1633100	0	1421400	2843000	14401	2959500	1708700	3723400	3570400	1841100	3388300	1478000	2760600	3388300	1478000	2760600	68139	pyruvate kinase PKM-like isoform X2 [Carassius auratus]
24	54	XP_026104076.1	12.42	9	1	1		0	3050500	50836000	25068000	0	0	0	4945600	31040000	0	0	0	2201500	0	0	0	3050500	50836000	25068000	0	0	0	4945600	31040000	0	0	0	2201500	0	0	26318000	17993000	2201500	26318000	17993000	2201500	49786	tubulin beta-4B chain isoform X1 [Carassius auratus]
25	6	XP_026062804.1	8.57	10	3	3		283290000	221700000	216830000	266830000	297750000	257210000	227940000	169630000	319310000	267830000	232260000	289660000	319150000	365480000	304290000	241590000	205970000	193240000	243820000	254970000	221560000	206120000	151700000	296630000	227870000	214490000	262950000	303690000	328510000	280750000	258210000	248380000	302440000	228850000	220780000	278350000	50393	tubulin beta chain-like [Carassius auratus]
26	41	XP_026071574.1	0.45	17	6	6		896480000	672920000	670580000	663130000	707230000	760120000	701430000	607180000	678290000	718130000	702340000	676400000	776600000	867240000	811250000	760570000	597000000	539280000	548020000	608180000	666790000	626660000	520400000	601220000	550360000	618250000	589380000	682180000	553330000	595650000	727240000	725390000	816980000	612500000	596490000	615580000	49637	tubulin beta-4B chain-like [Carassius auratus]
27	42	XP_026084537.1	4.8	15	4	4	Carbamidomethylation	14117000	20317000	18274000	19975000	41462000	25748000	28675000	24397000	35613000	23026000	27965000	27173000	49767000	26783000	16526000	14117000	20317000	18274000	17337000	33756000	25748000	26361000	24397000	32088000	21916000	26692000	25920000	35114000	24933000	16526000	26157000	28723000	30595000	20985000	26407000	25837000	49659	tubulin beta chain isoform X1 [Carassius auratus]
28	5	XP_026053743.1	4.74	13	5	5		2602300000	1891500000	1941500000	2766100000	2391500000	1887200000	1763100000	1256300000	2066600000	2489000000	1776300000	2186700000	1503400000	3796600000	2812000000	2006200000	1514900000	1533800000	2293200000	2058500000	1585600000	1526500000	1057400000	1803700000	1703000000	1541300000	1969500000	1161700000	2564600000	1783000000	2323500000	1902900000	2440300000	1882600000	1537000000	1806000000	50535	tubulin beta chain-like [Carassius auratus]
29	3	XP_026067183.1	2.69	7	2	2	Carbamidomethylation; Acetylation (Protein N-term); Oxidation (M)	1194900000	734120000	1015100000	564140000	635640000	887700000	792060000	894400000	677380000	809480000	899380000	884200000	714610000	913700000	1072300000	1161200000	714400000	999880000	550190000	618250000	858660000	775800000	874840000	661330000	791170000	881430000	866270000	697760000	877630000	1046900000	831190000	812590000	898130000	810580000	792360000	874000000	41753	actin cytoplasmic 1 [Carassius auratus]
30	21	XP_026128071.1	0.59	5	1	1	Carbamidomethylation	1509700	3005100	3147300	3492500	8078700	4406100	4601100	2030200	6401700	2322400	4320300	6215700	3046800	6954700	1872700	1509700	3005100	3147300	3492500	8078700	4406100	4601100	2030200	6401700	2322400	4320300	6215700	3046800	6954700	1872700	3846700	3952300	4482100	3846700	3952300	4482100	50049	tubulin alpha chain-like [Carassius auratus]
31	1	XP_026114193.1	0.79	5	1	1	Carbamidomethylation; Acetylation (Protein N-term); Oxidation (M)	345140000	248140000	331090000	180620000	197640000	179870000	252290000	299020000	205030000	240780000	192550000	257770000	210580000	262930000	351560000	344360000	246640000	330740000	179580000	196810000	178300000	251650000	298420000	204460000	240780000	192070000	256980000	208760000	262420000	351560000	261100000	235750000	255390000	260200000	234910000	254500000	41767	actin cytoplasmic 1 [Carassius auratus]
32	177	XP_026080034.1	4.85	14	9	9	Carbamidomethylation; Acetylation (Protein N-term)	226240000	231370000	133740000	282640000	279960000	232800000	280650000	147590000	322920000	176190000	237690000	272210000	390980000	256730000	220020000	137680000	160140000	82776000	193590000	190040000	153660000	205340000	106950000	237060000	111430000	165550000	204260000	308850000	168610000	168350000	230790000	232030000	275520000	152850000	162890000	203130000	102564	hexokinase-1 [Carassius auratus]
33	143	XP_026134409.1	6.09	16	12	12	Carbamidomethylation; Acetylation (Protein N-term)	181350000	152330000	100130000	211570000	217490000	192670000	201200000	97821000	211200000	146540000	204960000	210600000	332660000	196420000	192830000	113430000	78063000	64939000	109270000	108840000	111170000	100400000	56156000	114590000	93169000	106940000	102950000	134470000	109800000	107770000	182300000	177770000	234710000	96746000	95097000	113620000	102337	hexokinase-1-like [Carassius auratus]
34	28	XP_026099008.1	5.78	36	9	9	Carbamidomethylation	1452200000	1237800000	889670000	1418800000	1763000000	1122600000	1140900000	752360000	1325000000	1009900000	1037200000	1040300000	1387700000	1634300000	963230000	1191900000	1099800000	726350000	1275000000	1567400000	947480000	874420000	663010000	1096200000	781180000	828210000	821590000	954760000	1289100000	729310000	1373000000	1086100000	1280700000	1172100000	872470000	924600000	39485	fructose-bisphosphate aldolase C-like [Carassius auratus]
35	66	XP_026066673.1	4.3	9	4	4		165390000	121000000	143760000	78329000	92973000	149870000	122270000	134160000	112370000	128180000	129750000	150940000	128540000	126820000	160800000	156070000	113570000	136240000	74376000	87661000	140540000	113950000	123280000	106590000	123940000	121930000	142970000	119610000	123350000	154990000	120290000	129370000	139370000	113580000	121660000	132570000	68502	V-type proton ATPase catalytic subunit A [Carassius auratus]
36	9	XP_026117182.1	2.01	39	11	11	Carbamidomethylation; Acetylation (Protein N-term); Oxidation (M)	1345700000	1050800000	835420000	1084300000	1197900000	1102900000	1078000000	591560000	1212400000	883110000	1089200000	1140800000	1054400000	1222500000	900170000	1210700000	728620000	733440000	878480000	909140000	931630000	828780000	403890000	882980000	762660000	872480000	926530000	627090000	1126400000	812410000	1122200000	1015800000	1144800000	894680000	761990000	872990000	50231	tubulin alpha chain-like [Carassius auratus]
37	169	XP_026097061.1	5.25	13	6	6	Carbamidomethylation	233160000	192990000	203350000	217250000	265780000	191280000	170310000	140530000	196320000	181040000	165000000	178790000	165600000	261890000	207310000	136220000	104920000	127250000	122260000	149110000	121530000	89755000	73847000	119020000	123600000	108030000	103480000	80278000	163850000	139680000	222720000	179840000	200630000	128170000	109490000	119330000	83678	heat shock protein HSP 90-beta isoform X1 [Carassius auratus]
38	240	XP_026067846.1	4.55	12	17	17	Carbamidomethylation	98877000	69794000	61979000	71861000	84996000	51383000	77225000	48365000	80272000	75374000	81235000	50017000	63751000	88494000	48241000	46467000	32596000	23767000	25752000	33082000	12678000	38541000	17159000	36645000	33471000	42228000	14769000	12609000	35271000	11482000	80031000	69178000	72561000	32645000	27699000	26168000	269929	spectrin beta chain non-erythrocytic 1-like isoform X3 [Carassius auratus]
39	45	XP_026093921.1	2.3	15	7	7		52351000	102420000	73433000	28681000	87587000	53714000	52995000	78330000	103940000	80508000	51840000	55092000	125790000	130770000	121700000	45136000	94808000	68261000	19131000	83123000	47665000	47377000	71943000	92527000	79340000	42749000	47922000	114740000	129370000	120090000	87680000	92537000	135900000	79485000	85451000	128210000	68341	V-type proton ATPase catalytic subunit A-like [Carassius auratus]
40	430	XP_026051181.1	0.66	26	5	5	Carbamidomethylation; Oxidation (M)	1340900000	1284100000	726900000	1491100000	2083400000	1326200000	1683400000	725670000	1536900000	1253100000	1127800000	1383000000	1609600000	1513800000	909620000	1270600000	1191800000	704410000	1368000000	1939600000	1279000000	1524500000	641480000	1412500000	1223300000	1010800000	1276700000	1090300000	1415500000	842080000	1407100000	1339800000	1333000000	1295300000	1216300000	1128400000	39549	fructose-bisphosphate aldolase C [Carassius auratus]
41	280	XP_026100916.1	12.71	42	26	26	Carbamidomethylation; Acetylation (Protein N-term); Oxidation (M)	3175300000	3212200000	2110900000	3166200000	2661100000	2214900000	2620000000	1742000000	2532600000	2108500000	2420200000	2144100000	2820800000	2402400000	1878800000	806870000	912830000	549160000	1040900000	872490000	610370000	667650000	443340000	670420000	525400000	643400000	536020000	627340000	578760000	404700000	2901700000	2309900000	2392500000	836460000	583440000	558040000	65022	low molecular weight neuronal intermediate filament-like [Carassius auratus]
42	187	XP_026146243.1	2.87	7	3	3	Carbamidomethylation	28750000	16828000	29131000	27711000	30321000	24799000	19229000	17464000	23327000	26376000	22309000	25250000	13760000	34091000	29280000	28750000	16828000	29131000	27711000	30321000	24799000	19229000	17464000	23327000	26376000	22309000	25250000	13760000	34091000	29280000	29234000	22239000	28214000	29234000	22239000	28214000	83565	heat shock protein HSP 90-beta-like [Carassius auratus]
43	16	XP_026092589.1	2.69	14	5	5		198100000	176270000	156720000	235120000	191820000	194730000	162620000	131340000	191740000	176540000	168850000	187020000	199680000	187200000	148170000	163880000	135720000	137880000	195870000	147040000	161460000	115960000	106210000	150600000	158760000	134580000	155010000	123040000	167870000	137010000	192410000	173140000	180730000	156880000	140340000	146050000	50502	rab GDP dissociation inhibitor alpha [Carassius auratus]
44	142	XP_026060817.1	0.81	20	10	10	Carbamidomethylation	194280000	222560000	134930000	216470000	262730000	197680000	206040000	158760000	250110000	172090000	187820000	221050000	241250000	192170000	135300000	127750000	134260000	96783000	144060000	182470000	135340000	116470000	112170000	165150000	135530000	118440000	138140000	139510000	140870000	93966000	209460000	199130000	195520000	137070000	132930000	126180000	82462	vesicle-fusing ATPase isoform X2 [Carassius auratus]
45	70	XP_026089954.1	16.17	40	15	15	Carbamidomethylation; Oxidation (M)	1952700000	1487800000	1434100000	1713400000	1741100000	1500400000	1489200000	1312700000	1661600000	1562300000	1504100000	1488600000	1732300000	2072000000	1668300000	930920000	845630000	731870000	980690000	897650000	708230000	688360000	725570000	741580000	683950000	723330000	634090000	764740000	908680000	764590000	1681300000	1512100000	1710800000	877350000	709540000	759090000	61557	dihydropyrimidinase-related protein 3 [Carassius auratus]
46	163	XP_026122785.1	5.6	41	29	29	Carbamidomethylation	617380000	625120000	414360000	429770000	605830000	766080000	716350000	508310000	756430000	570220000	656480000	717930000	824120000	602640000	577170000	323370000	222720000	228300000	165440000	236380000	357570000	304320000	231370000	294010000	277410000	293670000	319160000	210260000	268970000	262390000	546650000	686420000	703410000	235240000	292940000	270890000	96799	glycogen phosphorylase muscle form-like [Carassius auratus]
47	493	XP_026147020.1	0.9	26	6	6	Carbamidomethylation; Acetylation (Protein N-term); Oxidation (M)	1791100000	1873800000	1804100000	1618500000	1941900000	1711400000	1725700000	2029900000	1793400000	1606800000	1506600000	1443000000	2386500000	1925900000	1959300000	1415100000	1137100000	1465100000	1297500000	1406900000	1287600000	1114800000	1403300000	1320800000	1357200000	1113900000	1015100000	1377200000	1756200000	1750800000	1816500000	1782600000	1861200000	1344300000	1296800000	1402600000	42886	creatine kinase B-type [Carassius auratus]
48	59	XP_026097588.1	2.37	19	6	6		1359800000	961130000	658830000	661530000	809310000	1035000000	1004100000	349060000	920180000	853890000	1047200000	1153800000	891100000	894110000	841950000	1344800000	961130000	646710000	647470000	806030000	1028600000	1004100000	344800000	914950000	835540000	1039400000	1151300000	891100000	871470000	817310000	898360000	841060000	982790000	885190000	829020000	961260000	47233	alpha-enolase isoform X2 [Carassius auratus]
49	68	XP_026056267.1	0.88	12	5	5	Carbamidomethylation	22712000	14525000	12591000	13264000	20274000	20771000	10498000	7844200	21843000	16027000	17867000	11254000	25466000	12434000	6767400	20386000	12673000	10853000	9712900	16630000	18114000	8949300	6736900	19166000	13954000	15805000	9544200	23309000	9540200	5424800	16673000	16739000	17370000	14051000	14622000	15337000	68545	V-type proton ATPase catalytic subunit A-like [Carassius auratus]
50	38	XP_026099618.1	11.9	10	3	3		181570000	164240000	133000000	232940000	214880000	134350000	127930000	102700000	164280000	134160000	149240000	148480000	165040000	234070000	161180000	181570000	164240000	133000000	232940000	214880000	134350000	127930000	102700000	164280000	134160000	149240000	148480000	165040000	234070000	161180000	185330000	132680000	171600000	185330000	132680000	171600000	50489	rab GDP dissociation inhibitor alpha-like [Carassius auratus]
51	35	XP_026096959.1	0.87	12	5	5		523530000	520080000	409500000	289730000	523380000	433890000	814810000	523160000	525060000	316410000	508010000	506080000	1182000000	253560000	341490000	453100000	455930000	378720000	254680000	478570000	386650000	722050000	494790000	462540000	282200000	454660000	446780000	1090400000	212940000	301130000	453240000	524180000	559340000	404200000	469650000	502280000	47058	alpha-enolase isoform X2 [Carassius auratus]
52	139	XP_026141500.1	3.19	27	24	24	Carbamidomethylation	379290000	328590000	280850000	286000000	352680000	412990000	436520000	276050000	317110000	287540000	402250000	408540000	317540000	315320000	312820000	229070000	137440000	183240000	88946000	149120000	252490000	195900000	162700000	164510000	186300000	205540000	217040000	116280000	173060000	195970000	331290000	353090000	367050000	157560000	192380000	182390000	97148	glycogen phosphorylase brain form [Carassius auratus]
53	356	XP_026131563.1	4.9	19	14	14	Carbamidomethylation; Acetylation (Protein N-term)	154140000	167750000	123110000	201380000	222500000	156080000	152400000	143010000	165150000	112320000	157160000	156050000	165950000	150790000	108240000	85619000	99593000	66643000	97527000	117760000	85683000	82531000	75591000	83984000	63831000	86220000	82561000	76017000	82188000	54871000	175620000	149700000	151300000	93428000	78324000	76372000	127880	plasma membrane calcium-transporting ATPase 3-like isoform X4 [Carassius auratus]
54	65	XP_026112480.1	6.94	19	6	6	Carbamidomethylation	74964000	50257000	70611000	25255000	81581000	73252000	83168000	97896000	79915000	76930000	73750000	82877000	114370000	91885000	128420000	70030000	42845000	68992000	20833000	71006000	65820000	75237000	94111000	73236000	67217000	65699000	72335000	106290000	80539000	108530000	61420000	84171000	100940000	54741000	75124000	86679000	68563	V-type proton ATPase catalytic subunit A-like isoform X3 [Carassius auratus]
55	104	XP_026064360.1	1.21	25	12	12	Carbamidomethylation	3866000000	3186100000	2043500000	3488200000	2755500000	3274600000	3756000000	1803300000	2362800000	2348100000	3468800000	2492000000	3200600000	2559800000	2588900000	2268100000	1434700000	1286400000	1891900000	1424000000	1893800000	1846000000	946870000	1222100000	1551300000	1871300000	1387000000	1236900000	1528000000	1490000000	3075300000	2712100000	2881500000	1664900000	1493200000	1503200000	51203	glial fibrillary acidic protein [Carassius auratus]
56	33	XP_026125905.1	3.12	17	6	6	Carbamidomethylation	98193000	61780000	44483000	49985000	70210000	76048000	85511000	28898000	93206000	66932000	79836000	87242000	102310000	85921000	91729000	75296000	56117000	35961000	40593000	59803000	64016000	74450000	23308000	76063000	48951000	65768000	70527000	86893000	49934000	51721000	66503000	71817000	92842000	53554000	57640000	65560000	50247	tubulin alpha-8 chain-like [Carassius auratus]
57	53	XP_026096241.1	1.38	26	7	7	Carbamidomethylation	237170000	178610000	195160000	160670000	177130000	225870000	201390000	194260000	189570000	176990000	201680000	235750000	184850000	169680000	185270000	209460000	150910000	175610000	124370000	133750000	197810000	169600000	167060000	158890000	158490000	175910000	205160000	145240000	155930000	172930000	193450000	199990000	200030000	160790000	171230000	174860000	50583	rab GDP dissociation inhibitor beta-like [Carassius auratus]
58	56	XP_026093346.1	1.56	21	6	6		73262000	65634000	59082000	61403000	57540000	59903000	50158000	35094000	61513000	57417000	53513000	47506000	58465000	60229000	57388000	62512000	53227000	52269000	41481000	44656000	53566000	42165000	28530000	53288000	49919000	49042000	43835000	54824000	45834000	50502000	66480000	55027000	57203000	50983000	45816000	48860000	59453	T-complex protein 1 subunit epsilon [Carassius auratus]
59	494	XP_026089456.1	1.58	9	4	4	Acetylation (Protein N-term); Oxidation (M)	473940000	338090000	233960000	431340000	442610000	326020000	378990000	219510000	342130000	342300000	312890000	332840000	370480000	393230000	270700000	246510000	220490000	88636000	226750000	228360000	149810000	260500000	95908000	185830000	108430000	198710000	242580000	248480000	123880000	86280000	386100000	323650000	339880000	202570000	160360000	179980000	42858	creatine kinase B-type-like [Carassius auratus]
60	1852	XP_026083391.1	7.03	35	8	8	Oxidation (M)	2778000000	2002800000	2045500000	1499700000	1729400000	2384700000	2410000000	2232100000	1988400000	2109600000	2221200000	2539400000	2862700000	2277500000	2992100000	2617600000	1855200000	1928400000	1326400000	1620500000	2258100000	2218900000	2070100000	1840600000	1915000000	2066600000	2331200000	2615500000	1975500000	2598300000	2021600000	2257300000	2599300000	1869600000	2061800000	2317600000	35985	glyceraldehyde-3-phosphate dehydrogenase 2 [Carassius auratus]
61	32	XP_026064907.1	4.39	5	1	1		6223000	11961000	5502900	8902900	10189000	8896100	13572000	9693100	10961000	0	9979500	10613000	18933000	454240	0	6223000	11961000	5502900	8902900	10189000	8896100	13572000	9693100	10961000	0	9979500	10613000	18933000	454240	0	8555700	10781000	9994800	8555700	10781000	9994800	50504	rab GDP dissociation inhibitor beta [Carassius auratus]
62	110	XP_026052492.1	6.52	24	9	9		659760000	688150000	451740000	744350000	774710000	616360000	563370000	562690000	596990000	420280000	593020000	586680000	610770000	579510000	454890000	537730000	542680000	367460000	597520000	660440000	495850000	442070000	426320000	492060000	334020000	471510000	458620000	436990000	436320000	305410000	675760000	568120000	574770000	541170000	438070000	421770000	59708	ATP synthase subunit alpha mitochondrial [Carassius auratus]
63	1035	XP_026086626.1	5.63	9	2	2		55145000	26311000	22934000	17518000	57450000	47910000	44400000	24254000	57676000	55989000	40205000	44383000	84118000	94529000	95157000	44806000	13564000	19583000	11672000	34453000	34584000	19894000	14946000	35261000	50993000	26605000	28955000	26810000	88647000	89699000	35872000	46046000	71679000	24815000	31135000	52143000	39984	guanine nucleotide-binding protein G(o) subunit alpha isoform X1 [Carassius auratus]
64	58	XP_026051297.1	0.14	36	12	12	Carbamidomethylation	357870000	242460000	242050000	350400000	372900000	273890000	279470000	228200000	316530000	303350000	277510000	276390000	293800000	406440000	280300000	186760000	122830000	113420000	158240000	170280000	154920000	166480000	127990000	173470000	121280000	165910000	181310000	144390000	150220000	120250000	324150000	294410000	324840000	150310000	148830000	152420000	61564	dihydropyrimidinase-related protein 3-like isoform X2 [Carassius auratus]
66	211	XP_026052818.1	5.44	28	16	16	Carbamidomethylation	113190000	115810000	105440000	136990000	161910000	121310000	121780000	110960000	157380000	103800000	120100000	110890000	159530000	110330000	97183000	54715000	60369000	64233000	74224000	73569000	67155000	65052000	61735000	87702000	58584000	63865000	60205000	64708000	54697000	55683000	127790000	126250000	128170000	65422000	68045000	59832000	93843	dynamin-3-like isoform X1 [Carassius auratus]
67	297	XP_026105286.1	1.66	4	5	5		45070000	3781200	35132000	24864000	15490000	33001000	21578000	23361000	22231000	31080000	30192000	27217000	15584000	40104000	40435000	41044000	2412900	31916000	22818000	14379000	32130000	20411000	22996000	20537000	27786000	27489000	26768000	13341000	36441000	36077000	33056000	27628000	32551000	30702000	25943000	29196000	253940	spectrin beta chain non-erythrocytic 1-like isoform X5 [Carassius auratus]
68	85	XP_026129236.1	9.27	28	13	13	Carbamidomethylation	462210000	354140000	347820000	496980000	461660000	368180000	341950000	318490000	398270000	347330000	325080000	267440000	353410000	509990000	391420000	309500000	251720000	237470000	356800000	319510000	250790000	235950000	229140000	260640000	209890000	235720000	189930000	261520000	276930000	229120000	446180000	364620000	395870000	295000000	237280000	238650000	70111	dihydropyrimidinase-related protein 2 isoform X1 [Carassius auratus]
69	1034	XP_026112991.1	3.25	9	2	2		19903000	9686100	11328000	5061300	33917000	17065000	17903000	18558000	23013000	24034000	12490000	16133000	35675000	36054000	43052000	16438000	5356800	10218000	2995200	21575000	12240000	7003200	8398700	14044000	22968000	7767600	11155000	12023000	34291000	42448000	15979000	20975000	28681000	11317000	13792000	21537000	39986	guanine nucleotide-binding protein G(o) subunit alpha-like isoform X1 [Carassius auratus]
70	98	XP_026129575.1	0.86	3	1	1		65416000	16767000	49753000	20646000	45002000	39324000	18119000	14785000	37287000	41898000	38547000	19136000	17566000	57141000	40813000	65416000	16767000	49753000	20646000	45002000	39324000	18119000	14785000	37287000	41898000	38547000	19136000	17566000	57141000	40813000	43862000	39152000	45030000	43862000	39152000	45030000	71259	heat shock cognate 71 kDa protein [Carassius auratus]
71	306	XP_026090598.1	6.15	14	8	8	Carbamidomethylation	524880000	452040000	331130000	370200000	399300000	428980000	477510000	241710000	470630000	442230000	434460000	408840000	506780000	488270000	431030000	446540000	327150000	312990000	304150000	311000000	344290000	389710000	204200000	382860000	401200000	351760000	362980000	406910000	438040000	389050000	423870000	413010000	456710000	340370000	344450000	389750000	93371	neurofilament medium polypeptide-like [Carassius auratus]
72	61	XP_026127661.1	0.82	49	19	19	Carbamidomethylation	427940000	401480000	304840000	395600000	358000000	371400000	355510000	311340000	396390000	305710000	386200000	361600000	466100000	329480000	296780000	178020000	164560000	117000000	137070000	113170000	157520000	162020000	124100000	173990000	136690000	164340000	152250000	234300000	112790000	111320000	382320000	348530000	374840000	141960000	150870000	155000000	60960	60 kDa heat shock protein mitochondrial-like [Carassius auratus]
73	109	XP_026118308.1	1.11	19	7	7	Carbamidomethylation	77533000	234990000	133760000	237940000	244410000	91941000	156370000	135860000	194500000	113490000	202820000	181540000	213410000	128440000	101360000	47346000	189310000	116950000	179430000	199630000	54451000	127950000	111210000	159790000	97707000	166990000	142900000	143180000	98350000	70464000	217540000	163050000	168590000	171160000	125840000	124840000	59851	ATP synthase subunit alpha mitochondrial-like [Carassius auratus]
74	117	XP_026056802.1	3.85	8	1	1		14160000	9858900	10141000	22654000	15121000	11665000	6957200	0	0	11214000	11143000	8593000	15590000	13315000	10687000	14160000	9858900	10141000	22654000	15121000	11665000	6957200	0	0	11214000	11143000	8593000	15590000	13315000	10687000	14387000	9945100	11866000	14387000	9945100	11866000	59375	T-complex protein 1 subunit epsilon-like [Carassius auratus]
75	71	XP_026106247.1	1.44	6	2	2		23608000	26164000	24323000	17394000	22806000	22897000	25164000	30671000	22535000	14123000	23112000	25382000	24476000	13702000	16551000	23608000	26164000	24323000	17394000	22806000	22897000	25164000	30671000	22535000	14123000	23112000	25382000	24476000	13702000	16551000	22859000	23078000	21319000	22859000	23078000	21319000	89444	transitional endoplasmic reticulum ATPase-like [Carassius auratus]
76	100	XP_026067012.1	2.55	3	1	1		15376000	13866000	14810000	8099500	12293000	17024000	16895000	18028000	15804000	8647100	17234000	17397000	14891000	5757900	6560700	15376000	13866000	14810000	8099500	12293000	17024000	16895000	18028000	15804000	8647100	17234000	17397000	14891000	5757900	6560700	12889000	15280000	12368000	12889000	15280000	12368000	89476	transitional endoplasmic reticulum ATPase [Carassius auratus]
77	499	XP_026099038.1	17.92	31	9	9	Carbamidomethylation	537340000	523750000	412850000	510060000	508310000	460660000	491430000	391580000	458110000	363930000	478840000	447220000	518540000	434430000	340050000	297530000	284570000	239130000	351750000	307660000	235970000	219200000	225080000	224400000	198550000	234550000	185240000	229870000	282390000	174110000	501660000	433930000	448360000	296130000	220640000	221230000	44674	phosphoglycerate kinase 1 [Carassius auratus]
78	141	XP_026102356.1	9.5	18	7	7	Carbamidomethylation	192070000	124350000	77601000	111380000	139620000	170590000	158410000	94161000	168200000	136400000	160390000	178700000	258270000	151500000	150480000	165620000	104870000	69404000	86905000	112770000	146830000	133520000	73438000	144240000	121340000	136910000	156180000	224950000	143890000	132920000	136040000	147170000	187770000	110010000	125490000	165770000	67534	syntaxin-binding protein 1 isoform X2 [Carassius auratus]
79	216	XP_026106154.1	4.76	23	13	13	Carbamidomethylation	120680000	127300000	102780000	186400000	178480000	128260000	119610000	104110000	167370000	102000000	129380000	141070000	179740000	136610000	120860000	46449000	56882000	43559000	80492000	75792000	62083000	56708000	51302000	84331000	49688000	64741000	68412000	100790000	61084000	70395000	144650000	125520000	145720000	60635000	60822000	73083000	95958	elongation factor 2-like [Carassius auratus]
80	81	XP_026116311.1	1.72	27	7	7	Carbamidomethylation	182660000	250790000	130580000	197800000	185580000	168900000	176400000	150690000	220800000	118770000	192270000	150390000	234850000	148790000	116840000	147230000	200820000	102990000	136570000	150400000	130590000	141280000	116170000	163010000	92980000	156900000	123630000	180170000	121710000	84904000	190050000	169800000	178340000	147600000	128800000	136850000	47178	enolase-like [Carassius auratus]
81	1100	XP_026059586.1	7.28	32	9	9	Acetylation (Protein N-term)	883920000	779940000	548880000	943280000	912490000	732330000	558840000	500750000	679210000	575120000	639110000	693810000	617560000	1031400000	699290000	822410000	624890000	507200000	772930000	768700000	681530000	475260000	413420000	581690000	545410000	566300000	608480000	463990000	981950000	668230000	814170000	610440000	737900000	699230000	539460000	658470000	52554	synaptic vesicle membrane protein VAT-1 homolog [Carassius auratus]
82	952	XP_026061008.1	0.59	2	1	1		1159200	3056000	2277800	4119900	4626500	2517500	3258300	1714200	5731800	964100	3382200	4609400	3134800	2510200	1637900	1159200	3056000	2277800	4119900	4626500	2517500	3258300	1714200	5731800	964100	3382200	4609400	3134800	2510200	1637900	3047900	2837200	3054900	3047900	2837200	3054900	115011	sodium/potassium-transporting ATPase subunit alpha-2-like [Carassius auratus]
83	92	XP_026062662.1	3.45	23	7	7	Carbamidomethylation	503820000	246520000	174310000	129310000	164760000	378740000	443260000	89411000	227420000	278120000	395310000	342440000	277350000	237850000	285620000	456950000	219030000	160210000	106080000	147310000	346190000	392940000	72134000	198590000	259950000	351030000	309090000	227270000	218140000	261970000	245190000	286750000	307710000	217920000	253960000	273500000	51398	glial fibrillary acidic protein-like isoform X1 [Carassius auratus]
84	153	XP_026090522.1	2.52	13	10	10		49722000	51193000	42509000	54716000	89215000	55951000	56233000	39906000	73839000	38081000	57448000	56908000	70363000	64033000	47977000	36305000	35800000	24720000	36308000	50588000	34929000	33956000	20875000	44413000	24363000	34151000	35784000	39441000	43606000	30375000	65307000	56111000	60939000	36744000	33115000	36672000	130042	pyruvate carboxylase mitochondrial-like [Carassius auratus]
85	366	XP_026052127.1	0.98	6	4	4		171230000	190190000	61574000	127410000	138990000	154970000	182200000	47959000	153660000	70401000	167120000	173780000	134950000	102370000	44262000	171230000	166810000	56910000	116790000	125090000	141160000	159030000	41754000	136620000	66461000	151600000	154460000	101120000	102370000	41579000	142790000	122070000	130640000	129650000	109240000	112800000	94129	neurofilament medium polypeptide-like [Carassius auratus]
86	180	XP_026051799.1	5.5	10	7	7		33504000	26920000	17641000	56803000	40078000	43403000	25009000	27380000	27650000	18711000	44635000	27180000	69864000	42041000	35298000	21498000	16003000	11635000	47350000	27875000	31543000	15851000	22465000	18128000	10867000	33468000	15750000	58945000	30480000	27742000	43882000	38504000	48704000	32957000	29609000	35896000	129773	pyruvate carboxylase mitochondrial [Carassius auratus]
87	1353	XP_026139113.1	1.12	38	10	10	Carbamidomethylation; Oxidation (M)	4063900000	3223800000	3117400000	2168700000	2489200000	3458200000	3332700000	3167700000	2842000000	2845800000	3141700000	3297300000	2793700000	3095300000	3847700000	3706400000	2926000000	2936100000	1839200000	2119900000	3183400000	3060400000	2958400000	2552900000	2612000000	2894900000	3074400000	2439200000	2754700000	3547600000	3013300000	3137200000	3235400000	2705500000	2873400000	2942200000	35970	glyceraldehyde-3-phosphate dehydrogenase 2-like [Carassius auratus]
88	106	XP_026052259.1	1.91	7	3	3		4935600	6802000	5315800	6466200	9658300	5134500	4521400	3899000	7353300	7818000	4952200	5205100	7154000	9754900	6703600	4935600	6802000	5315800	6466200	9658300	5134500	4521400	3899000	7353300	7818000	4952200	5205100	7154000	9754900	6703600	8074600	5932900	8442500	8074600	5932900	8442500	68729	syntaxin-binding protein 1-like isoform X1 [Carassius auratus]
89	376	XP_026077095.1	2.02	5	4	4		17868000	12194000	10124000	15178000	13420000	15544000	12148000	9409200	12754000	11900000	12195000	13030000	11297000	16721000	9889800	16062000	12194000	8884500	12243000	13420000	14186000	11260000	8376400	11403000	10257000	11199000	12777000	10544000	13373000	7923700	14554000	12351000	12627000	12561000	11097000	11163000	128118	plasma membrane calcium-transporting ATPase 1-like isoform X4 [Carassius auratus]
90	429	XP_026129628.1	0.95	39	12	12	Carbamidomethylation; Oxidation (M)	342510000	281660000	183120000	187890000	364270000	271590000	383030000	173760000	391660000	252060000	292910000	290090000	539010000	262490000	205260000	168440000	163190000	93689000	115880000	179800000	145240000	213320000	97897000	195980000	93029000	143830000	157280000	272510000	52373000	49998000	281240000	296060000	335960000	144970000	149090000	135200000	35467	malate dehydrogenase mitochondrial [Carassius auratus]
91	111	XP_026052260.1	1.5	4	1	1		10222000	19649000	8360300	7910200	13384000	13038000	21162000	20611000	18081000	4201000	15400000	17255000	32405000	2670100	646680	10222000	19649000	8360300	7910200	13384000	13038000	21162000	20611000	18081000	4201000	15400000	17255000	32405000	2670100	646680	11905000	15419000	13675000	11905000	15419000	13675000	67465	syntaxin-binding protein 1-like isoform X2 [Carassius auratus]
92	83	XP_026112983.1	6.65	6	3	3	Oxidation (M)	125150000	145670000	85663000	214390000	196720000	98736000	83278000	89535000	125640000	90766000	85754000	34736000	108570000	171310000	101660000	100180000	123210000	66335000	182890000	153430000	79543000	79950000	74858000	103620000	67902000	78486000	29711000	101160000	129430000	77491000	154040000	100620000	102930000	125210000	81174000	83257000	50387	isocitrate dehydrogenase [NADP] mitochondrial [Carassius auratus]
93	118	XP_026073715.1	9.18	45	19	19	Carbamidomethylation	394890000	348380000	302340000	343880000	327870000	278810000	299960000	306790000	327360000	282540000	332860000	292570000	370350000	346840000	296840000	129080000	127940000	119310000	170480000	124710000	105950000	98201000	114480000	124660000	114780000	107760000	87641000	135430000	120020000	110650000	347810000	307500000	333360000	134300000	111610000	112300000	61259	60 kDa heat shock protein mitochondrial-like [Carassius auratus]
94	140	XP_026098072.1	19.82	55	25	25	Carbamidomethylation	374060000	511890000	425210000	736650000	524390000	385250000	442810000	257690000	380080000	232170000	374320000	307280000	417450000	370220000	251250000	163120000	205600000	195320000	287300000	235810000	163750000	149780000	101580000	140950000	105580000	132740000	129030000	119010000	177870000	110070000	519250000	342700000	352820000	217430000	132330000	134360000	52672	plasticin [Carassius auratus]
95	503	XP_026121621.1	7.44	19	6	6		127860000	91457000	34932000	78565000	104370000	99051000	119940000	37432000	135970000	34289000	115820000	123890000	164940000	108570000	101640000	116760000	81666000	23421000	66416000	85373000	90926000	106410000	27795000	120480000	21032000	104430000	113160000	154170000	88282000	92493000	87740000	86652000	124370000	74726000	74070000	110990000	61209	dihydropyrimidinase-related protein 5-like [Carassius auratus]
96	55	XP_026115968.1	14.05	17	6	6	Carbamidomethylation	90665000	121140000	82559000	108190000	98324000	86386000	74353000	78563000	90697000	77387000	75290000	72665000	91910000	92583000	68715000	89144000	115240000	81594000	102370000	91595000	83519000	68995000	75231000	80794000	77233000	71622000	68768000	79379000	90292000	68411000	100180000	82157000	81429000	95990000	77154000	75695000	55838	V-type proton ATPase subunit B brain isoform-like [Carassius auratus]
97	129	XP_026141664.1	2.84	21	7	7	Carbamidomethylation	287440000	195970000	143890000	227140000	253430000	247230000	256380000	136050000	302880000	183170000	247900000	280740000	291830000	280310000	200760000	248060000	157760000	97716000	148890000	185820000	207840000	209590000	107310000	240730000	118380000	206830000	237260000	250460000	186070000	134750000	234320000	233670000	275570000	177040000	181020000	207800000	61183	dihydropyrimidinase-related protein 5-like [Carassius auratus]
98	29	XP_026075472.1	3	13	5	5	Carbamidomethylation	42603000	37826000	28065000	59495000	63378000	35076000	36510000	28991000	39146000	32172000	29815000	51026000	52274000	49922000	30150000	28859000	36257000	19726000	55434000	57351000	27633000	34574000	24679000	32216000	20722000	23352000	41020000	50027000	31344000	15377000	47960000	40141000	45560000	39526000	31437000	32544000	56408	V-type proton ATPase subunit B brain isoform [Carassius auratus]
99	120	XP_026075460.1	2.71	23	8	8		457660000	287700000	200950000	202590000	258010000	248070000	302080000	167780000	195700000	252950000	247240000	339880000	267280000	242190000	226020000	388290000	231630000	128780000	142840000	193220000	172650000	230730000	94856000	119980000	162350000	176380000	268830000	163790000	148120000	142630000	295140000	249310000	283270000	224220000	172100000	190440000	70285	dihydropyrimidinase-related protein 2-like isoform X1 [Carassius auratus]
100	1203	XP_026126316.1	7.02	23	2	2	Carbamidomethylation	12756000	21253000	13808000	20599000	24516000	18239000	21503000	17036000	28907000	25784000	18795000	20329000	27086000	38780000	34716000	12756000	21253000	13808000	20599000	24516000	18239000	21503000	17036000	28907000	25784000	18795000	20329000	27086000	38780000	34716000	18586000	22294000	27941000	18586000	22294000	27941000	37240	guanine nucleotide-binding protein G(I)/G(S)/G(T) subunit beta-1-like [Carassius auratus]
101	296	XP_026115964.1	0.41	9	5	5	Carbamidomethylation	61332000	59622000	44376000	61243000	93738000	70680000	83699000	52902000	71882000	48011000	70159000	65370000	85993000	63289000	43798000	41637000	50373000	32984000	41297000	72198000	54507000	71858000	46074000	58823000	29013000	57182000	55644000	74676000	34164000	23259000	65094000	65435000	65722000	48729000	52055000	48985000	97008	glycogen phosphorylase brain form-like [Carassius auratus]
102	662	XP_026081068.1	0.46	39	11	11	Carbamidomethylation; Acetylation (Protein N-term)	470290000	419250000	316930000	516060000	596300000	408190000	423920000	262890000	446990000	351300000	407370000	468690000	510900000	630780000	422000000	217910000	274660000	100090000	272280000	274050000	229510000	292710000	164620000	295710000	127020000	237630000	290010000	348620000	160540000	176390000	489880000	397020000	497500000	231000000	221910000	243960000	32813	ADP/ATP translocase 3 [Carassius auratus]
103	52	XP_026129247.1	10.33	8	5	5	Carbamidomethylation	79895000	83733000	55841000	78338000	98177000	58877000	65530000	65031000	78753000	33488000	69440000	38045000	95848000	60240000	52714000	73541000	77940000	53234000	71747000	91513000	52811000	58015000	56156000	63475000	31702000	63098000	31291000	65055000	59945000	52216000	79900000	67457000	69711000	74298000	59167000	60423000	56492	V-type proton ATPase subunit B brain isoform-like [Carassius auratus]
104	729	XP_026073556.1	2.64	51	15	15	Carbamidomethylation; Acetylation (Protein N-term); Oxidation (M)	708530000	651960000	519550000	634950000	583950000	594670000	661560000	506710000	752710000	773450000	623600000	762990000	617900000	679150000	761990000	446130000	313610000	406360000	314270000	279270000	377630000	342580000	315370000	386630000	564540000	382930000	412740000	282470000	445440000	537840000	639640000	679230000	702350000	351930000	397350000	412280000	32900	ADP/ATP translocase 3-like [Carassius auratus]
105	529	XP_026126132.1	3.08	15	5	5	Carbamidomethylation	112810000	136810000	97493000	231050000	187940000	112480000	138100000	103750000	135570000	102400000	120010000	105460000	178850000	127040000	84065000	108800000	126700000	96178000	217760000	170300000	103600000	127980000	102010000	129990000	97744000	108930000	95693000	162420000	127040000	84065000	154980000	122700000	128060000	143950000	112260000	115630000	73529	synapsin-1-like isoform X1 [Carassius auratus]
106	145	XP_026109644.1	2.21	44	18	18	Carbamidomethylation; Acetylation (Protein N-term)	251440000	191850000	181440000	276230000	244680000	229420000	223430000	179990000	244380000	202660000	223860000	214100000	255930000	259060000	225200000	133680000	51316000	88931000	127570000	87873000	114470000	111740000	74447000	112350000	119470000	104240000	116630000	98214000	112140000	124340000	239740000	221260000	247810000	99597000	107550000	111110000	65438	serine/threonine-protein phosphatase 2A 65 kDa regulatory subunit A beta isoform [Carassius auratus]
107	96	XP_026083239.1	3.15	21	6	6	Carbamidomethylation	52985000	95696000	59826000	210960000	99365000	96150000	94027000	97331000	45863000	44120000	85016000	93012000	103370000	66712000	114810000	37975000	79675000	45248000	188540000	75806000	78893000	75160000	82627000	21709000	32636000	76890000	75956000	74239000	53985000	105780000	111670000	88850000	94330000	92501000	71557000	77444000	60398	T-complex protein 1 subunit gamma [Carassius auratus]
108	127	XP_026082004.1	2.74	4	4	4		9147300	8075100	7130500	6902000	13750000	4484100	7945200	5771200	10781000	10074000	9610400	7747600	10690000	14802000	7613800	6251000	5643500	6170600	5353900	9170700	2650100	5314400	4275100	7431300	9045100	7038200	5659000	6085000	12912000	6369400	9001000	7811200	10981000	6518000	5743200	7612800	70985	heat shock cognate 71 kDa protein [Carassius auratus]
109	164	XP_026103255.1	9.28	5	3	3	Carbamidomethylation	53976000	46188000	27846000	81005000	62310000	41118000	46992000	25890000	43086000	21650000	31073000	29813000	41530000	32302000	19172000	53976000	46188000	27846000	81005000	62310000	41118000	46992000	25890000	43086000	21650000	31073000	29813000	41530000	32302000	19172000	65891000	43316000	30778000	65891000	43316000	30778000	71238	heat shock cognate 71 kDa protein-like [Carassius auratus]
110	79	XP_026088064.1	9.31	3	1	1	Carbamidomethylation	110220000	86242000	65042000	103980000	88747000	79631000	52388000	42153000	88418000	59383000	53978000	70012000	65384000	99181000	64992000	110220000	86242000	65042000	103980000	88747000	79631000	52388000	42153000	88418000	59383000	53978000	70012000	65384000	99181000	64992000	90848000	64395000	70709000	90848000	64395000	70709000	46929	gamma-enolase-like [Carassius auratus]
111	507	XP_026051134.1	2.37	19	6	6		456240000	345690000	266320000	393730000	449510000	341970000	317800000	261420000	357690000	331990000	305460000	288840000	388940000	421110000	251300000	395660000	275460000	207830000	308680000	352980000	289170000	264010000	201100000	281740000	282730000	238130000	235750000	311570000	351670000	198590000	382300000	325730000	331130000	308120000	267310000	267140000	44494	phosphoglycerate kinase 1-like [Carassius auratus]
112	238	XP_026110803.1	1.49	2	1	1	Carbamidomethylation	6072600	4514900	2965400	6772000	8541300	4603900	4531400	3756100	5364600	4767200	4503200	4206000	6615100	5574300	3084500	6072600	4514900	2965400	6772000	8541300	4603900	4531400	3756100	5364600	4767200	4503200	4206000	6615100	5574300	3084500	5773300	4604600	4796600	5773300	4604600	4796600	85507	ATP-dependent 6-phosphofructokinase liver type-like [Carassius auratus]
113	984	XP_026058470.1	3.02	18	8	8	Carbamidomethylation	225290000	148270000	217840000	479240000	513430000	366330000	283210000	162420000	425650000	244990000	357880000	347220000	380500000	296690000	253170000	112110000	54455000	135580000	306030000	374220000	256130000	185910000	62936000	291710000	146720000	249420000	239090000	236920000	184660000	191380000	477680000	369990000	399570000	357350000	262150000	292770000	46761	creatine kinase U-type mitochondrial-like [Carassius auratus]
114	501	XP_026082772.1	6.19	44	16	16	Carbamidomethylation; Oxidation (M)	827250000	1143300000	581360000	971340000	1138300000	758920000	1110900000	585690000	1046100000	575470000	874200000	832480000	1131400000	667270000	485840000	591010000	779310000	403630000	732570000	763320000	488150000	607420000	347650000	611080000	401200000	536790000	494720000	593500000	507840000	323660000	965540000	838260000	812160000	653970000	491100000	491300000	35747	dehydrogenase/reductase SDR family member 12-like [Carassius auratus]
115	1212	XP_026075751.1	0.13	26	8	8	Carbamidomethylation; Oxidation (M)	254530000	193780000	164400000	160730000	226210000	216320000	241090000	143440000	261760000	208970000	236070000	219480000	296770000	222210000	192700000	181760000	126360000	92313000	105860000	167780000	156100000	167840000	84270000	179760000	114280000	155820000	147570000	221620000	114130000	82708000	212150000	221890000	260600000	135270000	140450000	144370000	35410	malate dehydrogenase mitochondrial-like [Carassius auratus]
116	496	XP_026145037.1	10.25	3	1	1	Carbamidomethylation	85649000	79938000	57205000	90395000	83580000	66386000	48780000	40469000	73604000	61286000	57081000	55853000	63130000	85572000	50386000	85649000	79938000	57205000	90395000	83580000	66386000	48780000	40469000	73604000	61286000	57081000	55853000	63130000	85572000	50386000	79353000	58105000	62404000	79353000	58105000	62404000	46933	gamma-enolase isoform X1 [Carassius auratus]
117	962	XP_026090599.1	0.58	26	17	17	Carbamidomethylation; Acetylation (Protein N-term)	475180000	445600000	291580000	344840000	345770000	437820000	379460000	255140000	336770000	309550000	349730000	346510000	325230000	422890000	341900000	218080000	228560000	155100000	111040000	170090000	214780000	180300000	140970000	166210000	109370000	174050000	175510000	150920000	188420000	157740000	404620000	373090000	375950000	191540000	179390000	169430000	79531	neurofilament light polypeptide-like [Carassius auratus]
118	101	XP_026095312.1	2.94	43	16	16	Carbamidomethylation; Acetylation (Protein N-term)	595370000	705570000	490360000	486310000	566530000	610540000	657770000	558660000	622030000	447540000	607830000	676200000	751240000	459750000	481850000	402970000	429090000	363970000	219820000	284370000	417510000	423180000	394500000	374150000	333530000	401540000	447440000	441960000	313550000	373990000	571160000	583320000	601450000	340800000	388570000	395700000	62031	glucose-6-phosphate isomerase-like [Carassius auratus]
119	239	XP_026135894.1	1.34	18	7	7	Carbamidomethylation; Oxidation (M)	129970000	120260000	92378000	95925000	121200000	135780000	116230000	98188000	149770000	105070000	120110000	129150000	176970000	97375000	90911000	110150000	89951000	82569000	78520000	86281000	108560000	84313000	77238000	120180000	93772000	90600000	97568000	107980000	68500000	79484000	115150000	125530000	125370000	90062000	97554000	89125000	85689	ATP-dependent 6-phosphofructokinase platelet type-like isoform X3 [Carassius auratus]
120	1199	XP_026121802.1	6.79	6	1	1	Carbamidomethylation	54792000	67790000	49664000	55939000	47336000	49104000	37483000	40681000	40315000	58384000	42442000	40681000	30105000	66124000	65968000	54792000	67790000	49664000	55939000	47336000	49104000	37483000	40681000	40315000	58384000	42442000	40681000	30105000	66124000	65968000	55104000	45193000	49064000	55104000	45193000	49064000	37289	guanine nucleotide-binding protein G(I)/G(S)/G(T) subunit beta-1-like [Carassius auratus]
121	172	XP_026132555.1	6.91	4	3	3	Carbamidomethylation	8559100	7406200	9511700	20797000	15543000	5454200	6959700	8107100	8205400	8592100	5914800	5999400	10387000	9832800	6936900	3489800	7406200	4622000	14509000	10136000	2822200	5820900	6136000	5791600	1196300	4243100	2428700	10387000	2382900	1391100	14900000	8470000	9542400	9486800	5359700	4982900	95545	elongation factor 2 [Carassius auratus]
122	270	XP_026139325.1	6.78	18	19	19	Carbamidomethylation	125140000	143440000	98668000	148050000	155330000	136610000	149720000	110890000	153200000	124370000	142360000	159720000	167720000	151580000	117060000	51205000	44821000	44756000	52663000	50437000	40869000	50097000	48197000	53129000	54529000	51438000	60966000	54447000	56089000	47903000	137140000	136190000	152540000	49479000	49734000	54646000	174095	glycogen debranching enzyme-like isoform X1 [Carassius auratus]
123	188	XP_026068138.1	6.3	42	25	25	Carbamidomethylation; Acetylation (Protein N-term)	126460000	135950000	76564000	239460000	205810000	146870000	125070000	109920000	150320000	71503000	109200000	111150000	196280000	140360000	119930000	49408000	40913000	19467000	150130000	85201000	50242000	25438000	22875000	29653000	16369000	24491000	20269000	36924000	83439000	64199000	187390000	147490000	178960000	89403000	49966000	77141000	105651	AP-1 complex subunit beta-1 [Carassius auratus]
124	198	XP_026061247.1	0.27	4	2	2		3271200	4698700	2621400	7319600	6242700	5255400	6805300	4523400	5283700	1803200	7137400	4864600	7770800	3014200	3234100	3271200	4698700	2621400	7319600	6242700	5255400	6805300	4523400	5283700	1803200	7137400	4864600	7770800	3014200	3234100	4830700	4892300	5856700	4830700	4892300	5856700	95537	elongation factor 2 [Carassius auratus]
125	152	XP_026124499.1	0.05	17	4	4	Carbamidomethylation	51197000	51012000	41583000	43892000	57686000	50838000	52739000	49777000	52889000	37145000	51330000	45227000	61959000	40128000	45197000	51197000	47970000	40217000	41013000	56996000	50838000	51503000	49777000	50163000	36481000	49070000	43398000	57667000	40128000	45197000	52308000	51198000	53601000	50314000	49656000	50807000	59603	T-complex protein 1 subunit eta [Carassius auratus]
126	1850	XP_026103603.1	4.55	22	6	6	Carbamidomethylation	447140000	291830000	386030000	283480000	385850000	257170000	266490000	191550000	404000000	294480000	283580000	494740000	366820000	325890000	273900000	423190000	263000000	362830000	260920000	355620000	243400000	247630000	168760000	374550000	281160000	264540000	457420000	312150000	314730000	260790000	358870000	284220000	352640000	333110000	263320000	322900000	28879	phosphoglycerate mutase 1-like isoform X1 [Carassius auratus]
127	1810	XP_026088060.1	3.64	64	17	17	Oxidation (M)	484510000	634610000	382130000	935060000	840560000	468230000	586760000	490130000	689230000	364810000	469760000	535900000	603070000	463040000	337380000	193960000	331100000	194320000	544220000	438840000	177130000	275780000	272750000	372520000	186520000	197930000	267310000	273780000	229960000	183770000	664460000	525070000	490730000	343610000	256940000	232560000	33295	syntaxin-1B [Carassius auratus]
128	84	XP_026054973.1	18.32	68	26	26	Carbamidomethylation; Acetylation (Protein N-term)	444390000	416530000	332200000	450300000	440130000	382940000	359830000	268320000	388750000	308730000	372380000	349710000	419970000	388170000	320010000	147820000	161870000	127630000	162330000	139120000	128650000	109050000	111680000	124590000	116160000	121610000	126090000	113230000	139990000	107910000	421740000	351050000	386050000	149350000	118030000	124300000	60384	T-complex protein 1 subunit alpha-like [Carassius auratus]
129	182	XP_026078290.1	7.71	29	13	13	Carbamidomethylation	154040000	130840000	125210000	158580000	169330000	139220000	161940000	119270000	184940000	117050000	153520000	158340000	207340000	216510000	142880000	104710000	86182000	86422000	99644000	124600000	86383000	96859000	78117000	109540000	78430000	103620000	91249000	123860000	161670000	106690000	159240000	150140000	182390000	100310000	89866000	117420000	85003	aconitate hydratase mitochondrial-like [Carassius auratus]
130	210	XP_026053868.1	10.32	1	1	1		6308100	0	0	3341300	0	0	48527000	1503200	4795100	1433400	11664000	0	0	0	0	6308100	0	0	3341300	0	0	48527000	1503200	4795100	1433400	11664000	0	0	0	0	4824700	14065000	11664000	4824700	14065000	11664000	147332	vitellogenin-like [Carassius auratus]
131	156	XP_026116091.1	12.99	30	18	18	Carbamidomethylation	117590000	111760000	96520000	98094000	116210000	110580000	103150000	91319000	105080000	95116000	104930000	112780000	120130000	106760000	107410000	50651000	42661000	47396000	48039000	50686000	45778000	38001000	41103000	42165000	42991000	41703000	45433000	43849000	52671000	50352000	112010000	104430000	115630000	48983000	42739000	47049000	118041	ubiquitin-like modifier-activating enzyme 1 [Carassius auratus]
132	87	XP_026086692.1	0.1	11	5	5		114940000	110810000	73884000	106220000	172280000	129720000	128900000	80859000	159970000	88488000	118630000	141390000	195830000	84802000	74768000	108940000	105790000	71657000	100310000	165860000	126920000	125300000	78054000	155240000	84022000	115210000	139810000	189330000	78570000	71507000	115630000	117590000	124230000	110510000	113910000	119660000	50357	isocitrate dehydrogenase [NADP] mitochondrial-like [Carassius auratus]
134	1351	XP_026121761.1	6.5	65	14	14	Carbamidomethylation; Oxidation (M)	1217400000	1368800000	856590000	2277500000	1636500000	1035400000	948840000	1013700000	1274700000	1001900000	981340000	879910000	1242300000	1480900000	1079200000	603250000	789460000	501060000	1323000000	925160000	518550000	484810000	583960000	692020000	450170000	521150000	471600000	697140000	758900000	464580000	1489800000	1057200000	1150100000	829980000	545900000	583330000	27629	14-3-3 protein beta/alpha-A [Carassius auratus]
135	2271	XP_026061895.1	5.74	34	8	8	Carbamidomethylation; Acetylation (Protein N-term)	1667600000	1468300000	1133000000	2165100000	2220900000	1298000000	1363900000	1051200000	1773800000	1323400000	1216700000	1150600000	1917700000	1907800000	1370800000	1312600000	907130000	933030000	1579200000	1418900000	954760000	833940000	778420000	1130900000	1042300000	860930000	793050000	895410000	1610400000	1114500000	1770900000	1383400000	1564200000	1230200000	948060000	1054900000	41801	glutamine synthetase-like [Carassius auratus]
136	1297	XP_026084464.1	4.55	21	5	5	Carbamidomethylation	244480000	178320000	144450000	289130000	275600000	155240000	198460000	140250000	194730000	149270000	182680000	112830000	265320000	216990000	150290000	194310000	142700000	112340000	221190000	220110000	130120000	168790000	103770000	159740000	115190000	135440000	73110000	227720000	163930000	119540000	235550000	173710000	190390000	182240000	135520000	146120000	26815	triosephosphate isomerase B [Carassius auratus]
137	204	XP_026067005.1	1.35	12	6	6	Carbamidomethylation	35076000	34073000	41327000	69803000	46962000	34708000	36087000	38062000	48812000	43509000	35647000	35328000	56816000	43373000	48381000	33467000	30999000	39958000	66017000	45375000	33696000	33534000	37091000	46448000	41943000	33703000	34453000	55059000	41717000	46272000	46262000	41210000	45221000	43163000	38542000	42684000	95916	elongation factor 2-like [Carassius auratus]
138	94	XP_026124754.1	2.4	31	8	8	Carbamidomethylation	231000000	130340000	192370000	187450000	206000000	168240000	139360000	140660000	169400000	211390000	157100000	161100000	182090000	299390000	257830000	168270000	60937000	158350000	131600000	112770000	103590000	41960000	94406000	82799000	159140000	88244000	69780000	77685000	232690000	214650000	216040000	183880000	223400000	140120000	109180000	136610000	62592	dihydropyrimidinase-related protein 2-like [Carassius auratus]
140	346	XP_026052115.1	3.03	3	3	3		12100000	18339000	8035300	25898000	29224000	12070000	15222000	11198000	20199000	9316700	15760000	12458000	20596000	15122000	8758700	12100000	15919000	8035300	23603000	25936000	10278000	12916000	11198000	16341000	9316700	14345000	12458000	17058000	15122000	8758700	19786000	14662000	16025000	17119000	12010000	13548000	112864	NAD(P) transhydrogenase mitochondrial-like [Carassius auratus]
141	72	XP_026113747.1	1.64	15	4	4		44306000	48327000	26678000	57217000	47037000	41704000	45982000	26411000	47771000	29120000	37108000	39667000	82099000	38918000	29298000	44306000	48327000	25441000	57217000	47037000	40413000	45982000	26113000	47771000	26083000	37108000	39086000	82099000	34357000	25885000	46187000	38814000	48537000	44949000	37272000	45685000	45877	aspartate aminotransferase cytoplasmic-like [Carassius auratus]
142	554	XP_026065884.1	2.71	33	11	11	Carbamidomethylation; Acetylation (Protein N-term)	273000000	252610000	211490000	208360000	201220000	239350000	208670000	158260000	221670000	214060000	226100000	223390000	230380000	223660000	203050000	185540000	158680000	136690000	148080000	131360000	158230000	125980000	91621000	144520000	151370000	140490000	141090000	123430000	165990000	140390000	233230000	210540000	224260000	152070000	135190000	142280000	57830	T-complex protein 1 subunit beta-like [Carassius auratus]
143	224	XP_026062167.1	2.86	48	36	36	Carbamidomethylation	460980000	479290000	293670000	519630000	542700000	424090000	464460000	302890000	465840000	323020000	426170000	434210000	535900000	305740000	285560000	111490000	100220000	67022000	72639000	80237000	90035000	97411000	64993000	71123000	77413000	96018000	115300000	107500000	70764000	78111000	471610000	401530000	419450000	86819000	80703000	93537000	103542	AP-2 complex subunit alpha-2-like isoform X3 [Carassius auratus]
144	794	XP_026137442.1	5.32	34	8	8	Carbamidomethylation; Oxidation (M)	133260000	175780000	124630000	180630000	253370000	138270000	196230000	125860000	190480000	138130000	161140000	177730000	252150000	172700000	164890000	113210000	140720000	100930000	160130000	207200000	106050000	132910000	88464000	147240000	114530000	120590000	132320000	140750000	158450000	141950000	178520000	158570000	197980000	144440000	117840000	138810000	35822	dehydrogenase/reductase SDR family member 12-like [Carassius auratus]
145	107	XP_026132158.1	2.36	16	5	5	Carbamidomethylation; Oxidation (M)	35058000	40916000	30280000	56682000	65271000	29159000	39003000	37547000	54048000	26879000	44963000	41691000	56694000	46097000	32377000	33018000	37481000	27515000	55124000	61350000	27133000	37882000	34897000	50454000	18318000	41868000	35724000	54038000	33631000	18128000	46972000	38816000	46683000	42898000	33737000	36678000	60099	glutamate dehydrogenase mitochondrial [Carassius auratus]
146	328	XP_026090630.1	0.21	8	5	5		21214000	16808000	8340400	24906000	32207000	15866000	18378000	12324000	23639000	13158000	19088000	17595000	23462000	21020000	14567000	15714000	13660000	5384600	18959000	23726000	12161000	17210000	10264000	20078000	7790800	16148000	14228000	17008000	11315000	7384700	22438000	17173000	23730000	16227000	14000000	13462000	113105	NAD(P) transhydrogenase mitochondrial-like [Carassius auratus]
147	316	XP_026071466.1	0.08	39	21	21	Carbamidomethylation	185680000	182470000	109610000	160300000	186560000	194060000	203380000	150310000	189290000	122620000	193160000	177300000	269890000	131330000	144450000	81411000	88341000	57756000	98315000	93626000	90306000	77471000	88538000	84994000	67863000	84338000	71945000	105420000	67583000	78498000	178620000	181840000	203870000	88807000	81834000	81556000	98713	cytoplasmic aconitate hydratase [Carassius auratus]
148	1109	XP_026058874.1	2.34	31	7	7	Carbamidomethylation	913710000	1023500000	712790000	996580000	1228800000	775470000	890040000	647510000	1100900000	787260000	876910000	876730000	1353800000	1163800000	1036300000	600260000	859590000	519800000	922440000	1087800000	595340000	725800000	503230000	951340000	441460000	712620000	704330000	1104500000	607760000	465980000	975700000	840650000	1079400000	797970000	643430000	719030000	36257	L-lactate dehydrogenase A chain [Carassius auratus]
149	515	XP_026056620.1	7.55	13	6	6	Carbamidomethylation	7264000	5303400	4019700	10651000	7311600	8017200	8210600	5712200	1911000	4936000	10331000	9587900	20213000	6576600	6059700	6270900	4823900	3972200	7683000	5255800	6499500	6100100	3538800	486430	4270200	8414800	6515000	17529000	6392200	6008000	10158000	8981000	14042000	7836000	7292800	11703000	86110	ATP-dependent 6-phosphofructokinase platelet type-like isoform X5 [Carassius auratus]
150	276	XP_026097029.1	0.28	3	1	1		2388200	1205800	1547000	1805600	2958800	1810300	1544800	1644700	1523800	2530100	1555100	1889600	1705000	2723200	1592200	2388200	1205800	1547000	1805600	2958800	1810300	1544800	1644700	1523800	2530100	1555100	1889600	1705000	2723200	1592200	1981100	1810700	1893000	1981100	1810700	1893000	83699	heat shock protein HSP 90-alpha [Carassius auratus]
151	439	XP_026052738.1	8.98	22	11	11	Carbamidomethylation	146930000	123130000	116930000	143980000	177460000	124780000	106120000	99957000	119560000	113230000	132970000	129010000	136820000	166140000	116710000	103790000	85365000	83131000	85615000	104980000	98107000	63043000	71887000	71029000	71285000	97329000	102410000	79790000	96230000	72033000	151050000	130540000	160480000	92576000	78995000	89559000	77310	alpha-adducin-like isoform X12 [Carassius auratus]
152	2412	XP_026067656.1	25.69	13	1	1	Oxidation (M)	527250000	481380000	464360000	355200000	410920000	724100000	1009400000	316470000	749120000	551800000	597650000	784980000	830530000	933340000	815400000	525220000	479350000	461110000	351720000	409090000	714210000	1003200000	314690000	743200000	548290000	594860000	778890000	827660000	924690000	810170000	447960000	670190000	792740000	445300000	664720000	787250000	16327	hemoglobin subunit beta-like isoform X1 [Carassius auratus]
153	258	XP_026132536.1	11.79	16	6	6		130030000	118890000	74156000	76233000	122240000	117830000	135530000	49376000	123070000	87421000	125290000	142780000	175620000	123210000	113160000	95526000	81751000	51151000	60388000	84753000	84500000	91473000	44272000	108510000	70536000	91470000	106210000	119970000	101470000	93231000	105320000	103570000	140340000	75169000	80117000	103530000	84774	aconitate hydratase mitochondrial-like [Carassius auratus]
154	619	XP_026069691.1	1.35	33	11	11	Carbamidomethylation	191970000	168250000	124920000	227440000	155110000	171710000	162600000	137530000	175450000	121840000	157340000	150570000	193070000	165030000	141110000	118600000	98077000	72509000	161430000	81209000	106300000	91699000	75562000	112790000	79446000	92133000	101450000	102260000	109790000	88451000	175350000	159870000	164570000	106470000	97111000	98922000	56353	protein disulfide-isomerase [Carassius auratus]
155	88	XP_026078482.1	9.64	19	5	5	Carbamidomethylation	44627000	41391000	17851000	35832000	44666000	46184000	47430000	27777000	62340000	30694000	55874000	56272000	80769000	46444000	44794000	44027000	39507000	17851000	33708000	41054000	44220000	45299000	26072000	56649000	30204000	51284000	53491000	73621000	46444000	41472000	41986000	47610000	62358000	39172000	44224000	57138000	60094	glutamate dehydrogenase mitochondrial-like [Carassius auratus]
156	463	XP_026073193.1	0.42	31	17	17	Carbamidomethylation	337050000	406660000	203260000	379140000	399130000	323770000	356580000	275430000	370340000	264860000	327330000	351180000	457540000	275420000	218050000	143480000	183150000	106030000	161360000	152200000	151320000	163710000	134910000	181780000	120210000	162300000	171080000	220420000	90891000	81370000	361670000	337450000	348770000	154600000	150390000	147410000	84952	ATP-dependent 6-phosphofructokinase liver type-like [Carassius auratus]
157	1630	XP_026124171.1	9.55	11	3	3		83889000	99233000	99301000	126140000	78207000	63693000	50131000	67499000	79693000	95834000	67417000	73241000	74133000	83459000	85132000	60727000	97613000	63111000	112450000	78207000	49487000	50131000	61687000	73282000	54570000	56963000	62226000	74133000	52130000	45628000	102180000	75530000	83444000	83516000	58606000	60368000	54440	alpha-internexin-like [Carassius auratus]
158	820	XP_026112112.1	0.99	41	13	13	Carbamidomethylation	262650000	219800000	137380000	193090000	197190000	215940000	242460000	102360000	239060000	169320000	226840000	232090000	219330000	194190000	149410000	169030000	122660000	61752000	80396000	93150000	140690000	151950000	31260000	152500000	104590000	152110000	166770000	103810000	104840000	75044000	204480000	196550000	216940000	105780000	116200000	121630000	61011	dihydropyrimidinase-related protein 5-like [Carassius auratus]
159	246	XP_026137434.1	9.41	3	1	1		0	0	0	0	2607900	1393000	1251200	1635100	1508800	0	0	1016200	7559100	1532900	0	0	0	0	0	2607900	1393000	1251200	1635100	1508800	0	0	1016200	7559100	1532900	0	2607900	1447000	3369400	2607900	1447000	3369400	104074	alpha-actinin-4-like isoform X2 [Carassius auratus]
160	1924	XP_026138446.1	14.93	8	1	1		16552000	27216000	0	63592000	33699000	18102000	11219000	11088000	14659000	7311300	11159000	4624900	13445000	12279000	7379500	16552000	27216000	0	63592000	33699000	18102000	11219000	11088000	14659000	7311300	11159000	4624900	13445000	12279000	7379500	35264000	16190000	9777400	35264000	16190000	9777400	28278	14-3-3 protein gamma-B [Carassius auratus]
161	2136	XP_026096403.1	0.34	16	2	2		21485000	24476000	8884400	48690000	37613000	21909000	21730000	21512000	27575000	19434000	23181000	22467000	28118000	24615000	17744000	21485000	24476000	8884400	48690000	37613000	21909000	21730000	21512000	27575000	19434000	23181000	22467000	28118000	24615000	17744000	32261000	22432000	23225000	32261000	22432000	23225000	28264	14-3-3 protein gamma-1-like [Carassius auratus]
162	1107	XP_026140300.1	4.81	30	8	8	Carbamidomethylation	85114000	76152000	54986000	95780000	92196000	59965000	92757000	47268000	84228000	70795000	67938000	63450000	90807000	82294000	51082000	56567000	36719000	39391000	65666000	58349000	33818000	39081000	31134000	45566000	55748000	35092000	26850000	37208000	62900000	38673000	80846000	71003000	72581000	51338000	41069000	40145000	26748	triosephosphate isomerase B isoform X2 [Carassius auratus]
163	1727	XP_026071493.1	12.44	12	2	2	Acetylation (Protein N-term)	202940000	215910000	147840000	295500000	276980000	149300000	143860000	131450000	185610000	133580000	156590000	176150000	177120000	269560000	143570000	202940000	215910000	147840000	295500000	276980000	149300000	143860000	131450000	185610000	133580000	156590000	176150000	177120000	269560000	143570000	227840000	148760000	184600000	227840000	148760000	184600000	28775	14-3-3 protein epsilon-like [Carassius auratus]
164	731	XP_026060181.1	10.88	22	8	8		246570000	249340000	140630000	209900000	170030000	158120000	165560000	133700000	187670000	146500000	174310000	191520000	209730000	97934000	95479000	167660000	165570000	113580000	134430000	121250000	105250000	109830000	81933000	131950000	96949000	133930000	130510000	134220000	64743000	61115000	212570000	162000000	182010000	140500000	105800000	109220000	54415	alpha-internexin-like [Carassius auratus]
165	102	XP_026084118.1	7.95	61	18	18	Carbamidomethylation	309360000	315600000	252750000	285600000	316000000	301270000	262080000	228690000	283480000	231010000	289840000	290220000	322270000	281740000	265680000	130990000	145880000	104160000	122950000	152070000	128200000	106150000	95097000	117790000	92373000	114890000	116020000	122310000	116570000	89074000	309050000	270280000	302270000	131740000	108200000	112180000	57553	T-complex protein 1 subunit delta-like [Carassius auratus]
166	763	XP_026093072.1	5.08	2	1	1		5257000	13000000	2166000	10897000	9163400	6491900	7207000	6686600	6051100	1464900	6718800	1454800	9479800	1253700	815970	5257000	13000000	2166000	10897000	9163400	6491900	7207000	6686600	6051100	1464900	6718800	1454800	9479800	1253700	815970	8096800	5580300	3944600	8096800	5580300	3944600	47512	beta-enolase-like [Carassius auratus]
167	253	XP_026085335.1	0.66	20	11	11	Carbamidomethylation	53768000	59085000	39666000	52026000	51724000	52019000	50420000	40233000	59771000	40143000	53412000	50559000	56515000	53769000	38147000	22995000	30147000	22020000	30541000	24450000	26039000	22939000	25040000	27773000	21896000	26606000	20471000	26956000	29698000	23544000	52536000	49450000	53593000	26031000	24737000	25455000	93489	heat shock 70 kDa protein 4L-like isoform X2 [Carassius auratus]
168	265	XP_026115561.1	1.68	3	1	1		15419000	7291300	9591700	8292900	12070000	10272000	9183100	7185500	10985000	11331000	8983500	10515000	12538000	14749000	8837000	15419000	7291300	9591700	8292900	12070000	10272000	9183100	7185500	10985000	11331000	8983500	10515000	12538000	14749000	8837000	10533000	9791300	11125000	10533000	9791300	11125000	83835	heat shock protein HSP 90-alpha [Carassius auratus]
169	679	XP_026117478.1	0.69	6	2	2		16571000	14126000	11965000	14788000	29084000	17776000	16324000	13930000	18952000	18013000	15160000	14937000	33066000	21729000	13686000	16571000	14126000	11965000	14788000	29084000	17776000	16324000	13930000	18952000	18013000	15160000	14937000	33066000	21729000	13686000	17307000	16999000	19716000	17307000	16999000	19716000	73648	synapsin-1-like isoform X1 [Carassius auratus]
170	860	XP_026073874.1	6.03	7	3	3		50854000	24553000	17280000	9463200	26756000	41892000	48513000	8920300	30328000	31637000	34084000	43284000	43436000	32685000	28936000	45707000	19011000	15716000	9463200	21805000	36194000	39921000	6181800	30328000	29450000	29792000	38825000	29308000	32685000	28936000	26642000	33219000	39536000	22340000	28415000	31909000	46728	isocitrate dehydrogenase [NADP] cytoplasmic-like [Carassius auratus]
171	1816	XP_026081835.1	14.99	8	1	1		3094600	3372600	0	1214500	1295900	3195200	1179200	0	1221500	0	0	399570	0	0	0	3094600	3372600	0	1214500	1295900	3195200	1179200	0	1221500	0	0	399570	0	0	0	2244400	1865300	399570	2244400	1865300	399570	28294	14-3-3 protein gamma-1 [Carassius auratus]
172	941	XP_026085809.1	11	23	4	4	Carbamidomethylation	35007000	26087000	25960000	22401000	32707000	36196000	40393000	21126000	43753000	34963000	38261000	41775000	44966000	33574000	31094000	34863000	26087000	25896000	21452000	31586000	35590000	38415000	20708000	41864000	34963000	37480000	41186000	42211000	33574000	31094000	28546000	35531000	38790000	27977000	34308000	37415000	33055	beta-soluble NSF attachment protein-like [Carassius auratus]
173	1374	XP_026052084.1	5.66	22	9	9	Carbamidomethylation	79825000	72664000	43790000	61826000	97805000	86130000	94175000	68171000	97600000	71782000	76927000	75652000	127830000	72888000	87687000	49723000	48359000	32815000	43657000	62086000	51407000	60702000	48687000	71218000	53392000	49286000	52641000	77016000	50540000	68254000	73175000	85454000	91200000	47658000	58101000	60391000	80877	gelsolin-like [Carassius auratus]
174	195	XP_026080424.1	2.61	20	8	8		126990000	99098000	66714000	133950000	137450000	102840000	93957000	72020000	115590000	81501000	114380000	82553000	109200000	150090000	83783000	77606000	65519000	40351000	89957000	87117000	63561000	55178000	48004000	71167000	52648000	67815000	45058000	72753000	91127000	47046000	113540000	93182000	110810000	72110000	58112000	64760000	60158	glutamate dehydrogenase mitochondrial-like [Carassius auratus]
175	149	XP_026057258.1	11.82	35	11	11	Carbamidomethylation; Oxidation (M)	188610000	151200000	151990000	230100000	203800000	107450000	167320000	116330000	159660000	134740000	167280000	137260000	211890000	188570000	168100000	110270000	65941000	89136000	111320000	84925000	54654000	71864000	50554000	71914000	76294000	84976000	70325000	69587000	98891000	92120000	188030000	142840000	183090000	93665000	65056000	84884000	52202	vimentin [Carassius auratus]
176	2848	XP_026117002.1	6.92	18	8	8	Carbamidomethylation	244390000	184450000	99716000	252470000	323780000	276710000	190290000	158420000	251820000	158540000	263210000	251730000	227300000	330600000	221470000	215070000	164440000	90645000	222900000	289360000	239970000	163870000	132270000	223680000	126550000	232590000	233630000	202830000	296770000	196550000	223770000	207150000	264120000	196480000	177270000	232480000	50090	probable glutamate receptor [Carassius auratus]
177	1555	XP_026064944.1	1.69	21	7	7	Acetylation (Protein N-term); Oxidation (M)	887550000	584310000	415730000	668450000	567810000	655060000	752120000	464890000	740020000	568710000	737120000	640190000	794390000	596720000	530470000	791960000	517680000	375340000	609860000	493520000	582220000	667750000	416390000	649960000	504400000	673660000	597350000	708030000	549770000	503110000	625720000	637590000	661390000	557670000	564140000	606380000	35751	aldose reductase-like [Carassius auratus]
178	103	XP_026058908.1	2.66	28	11	11		128190000	151310000	91554000	132410000	161060000	115120000	169750000	124770000	148980000	82477000	130010000	137590000	150290000	63435000	61885000	84073000	108300000	61133000	94240000	111990000	71668000	120480000	91367000	104760000	44301000	92799000	105540000	97893000	32841000	33645000	134360000	132990000	115310000	91947000	86514000	76392000	62034	glucose-6-phosphate isomerase-like [Carassius auratus]
179	1574	XP_026082199.1	1.05	5	1	1	Oxidation (M)	487650	8004200	910220	9381500	15668000	2809500	5023400	11630000	9181700	1692000	2134300	3070600	6915900	740570	717280	487650	7015200	77296	8202200	13796000	1324200	3321700	11630000	4033000	470600	1186300	1552200	6915900	0	216540	7134000	6545100	3394700	5915700	4155900	2467800	29059	14-3-3 protein epsilon-like isoform X1 [Carassius auratus]
180	1704	XP_026124065.1	6.97	16	2	2	Acetylation (Protein N-term)	80764000	78497000	66511000	158670000	111080000	63778000	62416000	70710000	74907000	64081000	58554000	48934000	62068000	100020000	69302000	80764000	78497000	66511000	158670000	111080000	63778000	62416000	70710000	74907000	64081000	58554000	48934000	62068000	100020000	69302000	99104000	67178000	67776000	99104000	67178000	67776000	28857	14-3-3 protein epsilon-like isoform X2 [Carassius auratus]
181	1575	XP_026138029.1	8.56	5	1	1	Oxidation (M)	2204200	23536000	1091800	29193000	9423800	236970	2656100	22421000	6074500	49148000	1784500	1735600	7947400	3589400	3678900	2098500	23270000	818710	28811000	7755500	0	2541400	22421000	5196300	49148000	1384600	1513400	6897600	1762200	1567800	13090000	20237000	3747200	12551000	19827000	2625100	29073	14-3-3 protein epsilon isoform X1 [Carassius auratus]
182	474	XP_026090402.1	0.48	2	1	1	Carbamidomethylation	5082700	2567700	4374700	5116300	6987900	5290000	2921800	2037700	5223300	7884000	4588000	5004100	1233600	7404500	4472900	5082700	2567700	4374700	5116300	6987900	5290000	2921800	2037700	5223300	7884000	4588000	5004100	1233600	7404500	4472900	4825800	4671400	4540600	4825800	4671400	4540600	96811	glycogen phosphorylase muscle form-like [Carassius auratus]
183	734	XP_026127856.1	0.22	7	3	3		72492000	52694000	29907000	22902000	51641000	39358000	46137000	20277000	72790000	31159000	35096000	81440000	66039000	27844000	22379000	72492000	52694000	29907000	22902000	51641000	39358000	46137000	20277000	72790000	31159000	35096000	81440000	66039000	27844000	22379000	46152000	41944000	46559000	46152000	41944000	46559000	46702	isocitrate dehydrogenase [NADP] cytoplasmic-like isoform X2 [Carassius auratus]
185	1504	XP_026081526.1	0.23	9	3	3		6670000	16964000	4834800	10071000	16434000	9301400	14113000	5060700	17632000	4173500	12065000	7956900	22798000	7793200	3421500	6670000	16964000	4834800	10071000	16434000	9301400	14113000	5060700	17632000	4173500	12065000	7956900	22798000	7793200	3421500	12787000	10056000	11736000	12787000	10056000	11736000	66191	WD repeat-containing protein 1-like isoform X1 [Carassius auratus]
186	508	XP_026139199.1	2.53	52	21	21	Carbamidomethylation	218520000	268620000	186970000	194010000	143420000	215280000	258880000	135680000	182280000	140740000	203130000	125050000	284080000	174780000	201560000	63489000	74331000	64010000	49563000	33721000	63876000	78980000	45425000	75882000	51497000	59642000	55647000	92989000	59007000	73426000	214800000	194930000	219840000	58429000	63132000	68142000	54910	cytosolic non-specific dipeptidase-like [Carassius auratus]
187	534	XP_026093446.1	0.29	10	5	5	Carbamidomethylation	32861000	28687000	15639000	29491000	30889000	33002000	37478000	18215000	34821000	19903000	28266000	30439000	48075000	16381000	16114000	30681000	24970000	15639000	24783000	26908000	31467000	36120000	15974000	32177000	18283000	26234000	28209000	39934000	15015000	15158000	28618000	29541000	31058000	24596000	26804000	24910000	86300	ATP-dependent 6-phosphofructokinase platelet type-like isoform X6 [Carassius auratus]
188	2431	XP_026109981.1	6.46	20	1	1	Carbamidomethylation; Oxidation (M)	1389400	1273300	77488	1078300	746250	50124	0	319970	1333200	971040	1779000	616450	0	12991000	2452600	1389400	1273300	77488	1078300	746250	50124	0	319970	1333200	971040	1779000	616450	0	12991000	2452600	912950	668580	4459800	912950	668580	4459800	16341	hemoglobin subunit beta [Carassius auratus]
189	1116	XP_026116122.1	7.22	22	8	8	Carbamidomethylation	116900000	74457000	62978000	55910000	72441000	100990000	99165000	65849000	82482000	79530000	90030000	104920000	122930000	86977000	91166000	105610000	58403000	59888000	45392000	60833000	89287000	78711000	50360000	65173000	74386000	77960000	91905000	78835000	76669000	83404000	77572000	85603000	99796000	66025000	71583000	82345000	62815	transketolase-like isoform X2 [Carassius auratus]
190	262	XP_026141314.1	2.28	18	10	10	Carbamidomethylation	43008000	32278000	25460000	49158000	50547000	35226000	46942000	25765000	42229000	29773000	37969000	31601000	50128000	35314000	24062000	19511000	21635000	12912000	26351000	27621000	20168000	20494000	13549000	22839000	13920000	18757000	18703000	23364000	16328000	11916000	42002000	36770000	36639000	21606000	18194000	17814000	93349	heat shock 70 kDa protein 4L-like isoform X2 [Carassius auratus]
191	974	XP_026089580.1	9.82	17	3	3	Carbamidomethylation	14413000	21724000	11412000	14321000	42749000	18889000	36951000	16802000	58148000	13613000	33751000	33382000	88855000	28960000	37871000	13824000	20140000	10038000	13448000	38720000	17591000	32890000	14292000	55165000	11412000	31409000	30531000	84889000	26768000	33805000	23345000	31254000	44564000	21655000	28643000	41481000	36286	L-lactate dehydrogenase B-A chain-like [Carassius auratus]
192	502	XP_026133741.1	5.49	3	1	1		5312700	10833000	4343500	21247000	14240000	5505900	8011400	7513000	8181700	3537900	6031600	3004400	10665000	4136100	2902700	5312700	10833000	4343500	21247000	14240000	5505900	8011400	7513000	8181700	3537900	6031600	3004400	10665000	4136100	2902700	11195000	6550000	5347900	11195000	6550000	5347900	45812	aspartate aminotransferase cytoplasmic-like [Carassius auratus]
193	1502	XP_026095485.1	1.32	16	5	5	Carbamidomethylation	92217000	204260000	55098000	106980000	177120000	96962000	169110000	79999000	140470000	47732000	120730000	92294000	222620000	59028000	29585000	67306000	161380000	43509000	84524000	133430000	69099000	125740000	62848000	103520000	31329000	98619000	67902000	164920000	47579000	23020000	127760000	107030000	106830000	98369000	78683000	82384000	36263	L-lactate dehydrogenase A chain-like [Carassius auratus]
194	220	XP_026054434.1	1.47	10	6	6	Carbamidomethylation; Acetylation (Protein N-term)	60726000	56729000	47388000	34030000	60822000	71130000	66411000	53737000	54529000	41300000	65465000	69830000	63723000	41022000	49197000	44606000	42859000	37743000	22899000	44277000	56433000	48292000	44310000	39298000	31194000	49946000	51004000	43988000	26122000	38064000	52690000	58099000	60435000	39228000	44583000	44412000	92621	AMP deaminase 2-like isoform X2 [Carassius auratus]
195	1112	XP_026087520.1	7.89	45	11	11	Carbamidomethylation; Oxidation (M)	451500000	348690000	324600000	266780000	417350000	406400000	416790000	353420000	448070000	325010000	385860000	398250000	665760000	413580000	472480000	431040000	297830000	299240000	229040000	346120000	366380000	360060000	294080000	369650000	311030000	342260000	355300000	528700000	388730000	448470000	368140000	398640000	500580000	320980000	340240000	413150000	50005	elongation factor 1-alpha-like [Carassius auratus]
196	475	XP_026097946.1	1.79	2	2	2	Carbamidomethylation	12526000	8822900	7874600	13609000	13230000	10496000	9818900	5350700	12954000	10973000	10703000	12195000	9591300	16110000	9308000	12526000	8822900	7874600	13609000	13230000	10496000	9818900	5350700	12954000	10973000	10703000	12195000	9591300	16110000	9308000	11212000	9918700	11581000	11212000	9918700	11581000	129220	plasma membrane calcium-transporting ATPase 3-like isoform X3 [Carassius auratus]
197	256	XP_026068078.1	0.69	1	1	1		16127000	14201000	8756500	8767500	20739000	17823000	25270000	8531200	23482000	7364400	17827000	21872000	23734000	5042600	3625900	16127000	14201000	8756500	8767500	20739000	17823000	25270000	8531200	23482000	7364400	17827000	21872000	23734000	5042600	3625900	13718000	16494000	14420000	13718000	16494000	14420000	96123	dynamin-1 isoform X5 [Carassius auratus]
198	800	XP_026080406.1	0.89	4	2	2		9101800	8449700	7183100	6949800	8268700	7994200	8727400	7394700	10892000	7614700	6940700	7491700	13289000	7116400	7136700	5807400	5833400	4366300	6096100	7775500	6266100	6727700	4421700	8815900	4632900	6283200	4935200	10445000	3473800	2874100	7990600	8524600	8394800	5975700	6172900	5602300	56350	calcium/calmodulin-dependent protein kinase type II subunit gamma-like isoform X23 [Carassius auratus]
199	273	XP_026061430.1	10.38	5	1	1	Carbamidomethylation	0	0	0	0	2109900	956090	2617700	0	0	0	3504700	883490	0	0	102120	0	0	0	0	2109900	956090	2617700	0	0	0	3504700	883490	0	0	102120	2109900	1786900	1496800	2109900	1786900	1496800	80305	ATP-dependent 6-phosphofructokinase platelet type-like isoform X4 [Carassius auratus]
200	185	XP_026135377.1	11.38	12	6	6	Carbamidomethylation	33702000	25818000	21682000	25707000	25848000	25500000	22856000	20259000	26485000	21446000	26440000	26990000	22075000	35997000	24302000	21206000	20229000	17371000	20990000	21215000	17282000	16920000	18404000	17023000	12607000	17922000	15787000	18384000	22863000	15735000	27132000	24145000	29062000	20202000	16605000	19268000	73246	stress-70 protein mitochondrial [Carassius auratus]
201	553	XP_026071290.1	4.51	4	1	1	Carbamidomethylation	0	4383900	3005900	2672800	4726400	6039600	3299000	4206000	4651700	5098000	4575300	4091000	5603500	0	0	0	4383900	3005900	2672800	4726400	6039600	3299000	4206000	4651700	5098000	4575300	4091000	5603500	0	0	3697300	4658900	4756600	3697300	4658900	4756600	59731	T-complex protein 1 subunit eta-like [Carassius auratus]
202	200	XP_026097477.1	0.35	24	14	14	Carbamidomethylation	71560000	44383000	35417000	82919000	72548000	77677000	57722000	45487000	80770000	62969000	52318000	76601000	75281000	75516000	46357000	50010000	20476000	18413000	35210000	29502000	45688000	24152000	16267000	42690000	45682000	20411000	40903000	27979000	48502000	23029000	86044000	71881000	84668000	35533000	34896000	43655000	117910	ubiquitin-like modifier-activating enzyme 1 [Carassius auratus]
203	931	XP_026058456.1	10.69	22	6	6		61517000	57156000	51065000	94413000	77793000	54634000	50008000	44099000	50400000	41323000	47760000	55024000	66774000	56465000	42632000	44821000	39149000	36059000	51588000	44542000	39597000	35466000	28180000	36647000	28478000	35985000	38895000	51203000	34877000	33666000	72083000	48925000	57593000	43232000	33674000	38925000	55038	protein disulfide-isomerase A3 [Carassius auratus]
204	1884	XP_026051389.1	2.26	12	4	4	Carbamidomethylation	28981000	40854000	37066000	41996000	52997000	44507000	48867000	45174000	43543000	40342000	44481000	41989000	40751000	53250000	42935000	28981000	40854000	37066000	41602000	52997000	44507000	48467000	44860000	43255000	40342000	44438000	41798000	40045000	53250000	42935000	44634000	45310000	45807000	44240000	44976000	45493000	63146	calcium/calmodulin-dependent protein kinase type II subunit alpha-like isoform X2 [Carassius auratus]
205	1560	XP_026134770.1	6.6	20	4	4		35137000	21492000	16483000	24361000	19513000	18567000	22008000	14770000	24348000	21098000	24375000	20187000	24264000	28455000	26677000	30824000	20225000	15029000	23041000	18385000	16999000	20738000	13960000	22946000	19129000	22492000	18978000	23114000	26500000	22900000	23614000	21174000	28058000	21717000	19771000	26063000	42785	creatine kinase B-type-like isoform X3 [Carassius auratus]
206	2131	XP_026079573.1	1.56	33	4	4	Carbamidomethylation	55072000	45841000	36892000	45034000	43011000	52139000	50516000	44156000	51316000	42273000	45412000	73847000	85237000	21425000	25155000	53814000	40397000	36565000	43695000	41476000	50446000	45493000	42860000	47680000	42273000	44866000	72457000	78190000	21425000	25155000	51817000	50664000	57173000	49341000	47752000	53677000	28854	phosphoglycerate mutase 1-like [Carassius auratus]
207	1849	XP_026088412.1	3.64	37	7	7	Carbamidomethylation	198520000	305950000	162750000	243600000	232810000	193670000	275030000	209400000	242440000	126910000	212310000	194530000	326360000	127540000	112330000	151930000	240900000	130880000	211730000	187240000	147760000	191510000	187980000	184680000	100530000	154060000	132760000	234720000	110500000	93384000	228730000	209490000	199990000	184540000	162490000	145080000	26995	triosephosphate isomerase A-like [Carassius auratus]
208	943	XP_026142442.1	11.51	23	3	3	Carbamidomethylation	31088000	21674000	18645000	15326000	21481000	25813000	29365000	16517000	33260000	28663000	30250000	32964000	36817000	28227000	25954000	31088000	21674000	18645000	15326000	21481000	25813000	29365000	16517000	33260000	28663000	30250000	32964000	36817000	28227000	25954000	21643000	26724000	30842000	21643000	26724000	30842000	33085	beta-soluble NSF attachment protein-like [Carassius auratus]
209	561	XP_026100049.1	7.92	4	3	3		17256000	15028000	10241000	26563000	18791000	9579400	9202200	8808700	10051000	10382000	11061000	10265000	13624000	13029000	12706000	10367000	15028000	6407500	25999000	18483000	7591200	9112900	8385600	9724900	3930800	10121000	8874300	13624000	4496200	3192800	18601000	10092000	13867000	15702000	8236400	8773000	72351	endoplasmic reticulum chaperone BiP-like [Carassius auratus]
210	413	XP_026094764.1	2.14	7	15	15	Carbamidomethylation	70568000	90256000	55729000	122100000	106530000	72461000	84306000	69020000	98419000	53190000	67010000	65308000	101320000	69176000	45884000	31874000	28756000	24826000	52709000	39413000	28969000	30031000	29673000	37954000	22677000	25382000	29211000	32478000	36228000	25352000	95831000	77561000	73420000	35516000	29861000	29730000	418620	microtubule-associated protein 1B-like isoform X1 [Carassius auratus]
211	2273	XP_026138601.1	2.73	20	4	4	Carbamidomethylation; Acetylation (Protein N-term)	706850000	406630000	398520000	408620000	467030000	519780000	525540000	194200000	588230000	553890000	530310000	602790000	357690000	751940000	618990000	704700000	404430000	396170000	404710000	464160000	518450000	524010000	193270000	585000000	551650000	529010000	600660000	354700000	751240000	617640000	477530000	476330000	572340000	474830000	474480000	570650000	41805	glutamine synthetase-like [Carassius auratus]
212	415	XP_026057621.1	1.81	5	9	9	Carbamidomethylation	52273000	56891000	42182000	95929000	81974000	49614000	47954000	46907000	62136000	48505000	43859000	39888000	62818000	59861000	34037000	37785000	30442000	23733000	46317000	46795000	35568000	29486000	27476000	43067000	35327000	27549000	26722000	39785000	39694000	22647000	69349000	53958000	52688000	38921000	34185000	31280000	394441	LOW QUALITY PROTEIN: microtubule-associated protein 1A-like [Carassius auratus]
213	660	XP_026122016.1	1.04	60	15	15	Carbamidomethylation	98716000	111730000	51165000	97414000	138380000	111940000	139980000	76952000	112380000	64020000	125540000	126920000	247820000	87704000	92670000	58847000	61434000	31410000	34994000	78333000	59412000	64612000	39323000	58763000	44429000	56955000	57124000	100900000	48628000	42248000	110190000	104090000	143440000	53004000	53308000	61171000	45639	lanC-like protein 1 isoform X1 [Carassius auratus]
215	368	XP_026074967.1	6.4	6	7	7	Carbamidomethylation	11663000	9088300	8268000	15954000	14161000	7922100	5278000	5106100	8128000	7318100	10700000	5908700	7195900	9621300	10681000	7052700	4996300	4925800	7976900	7934100	5370200	3075400	2335400	6261200	5808500	6309100	3715300	3107500	6631200	6939400	12854000	7735100	9979400	6577100	4570100	5755400	270921	talin-1-like isoform X2 [Carassius auratus]
216	1786	XP_026094859.1	0.82	6	1	1	Carbamidomethylation	18088000	17881000	15216000	43407000	7134500	19229000	22465000	19854000	31739000	14918000	22671000	21732000	39339000	12540000	17336000	18088000	17881000	15216000	43407000	7134500	19229000	22465000	19854000	31739000	14918000	22671000	21732000	39339000	12540000	17336000	20345000	21641000	22724000	20345000	21641000	22724000	46772	creatine kinase U-type mitochondrial-like [Carassius auratus]
217	2161	XP_026146710.1	6.31	46	7	7	Carbamidomethylation; Acetylation (Protein N-term)	160310000	170870000	119830000	300400000	249390000	130710000	149270000	121720000	150660000	122710000	132090000	91567000	172450000	191370000	124390000	129810000	142800000	95845000	253410000	200240000	105400000	121550000	100980000	123460000	94020000	113330000	70226000	143350000	153120000	101110000	200630000	135710000	143010000	164420000	109080000	116230000	22843	synaptosomal-associated protein 25-A [Carassius auratus]
218	663	XP_026065589.1	2.49	21	3	3	Carbamidomethylation	81241000	77862000	37874000	75694000	116890000	67980000	56050000	41644000	71400000	57444000	54110000	55624000	98314000	70499000	46169000	81241000	77862000	37874000	75694000	116890000	67980000	56050000	41644000	71400000	57444000	54110000	55624000	98314000	70499000	46169000	79484000	63354000	64943000	79484000	63354000	64943000	36378	L-lactate dehydrogenase B-A chain [Carassius auratus]
219	1355	XP_026137818.1	4.79	2	1	1		1271000	781060	372710	707340	590120	228940	421110	435160	1420700	172890	1316700	1402100	865670	721250	348240	1271000	781060	372710	707340	590120	228940	421110	435160	1420700	172890	1316700	1402100	865670	721250	348240	744440	535750	930770	744440	535750	930770	70624	heat shock cognate 71 kDa protein-like [Carassius auratus]
220	1631	XP_026093578.1	1.03	24	16	16	Carbamidomethylation	173760000	109610000	104900000	149170000	186000000	177840000	134390000	92086000	147850000	126170000	130050000	174050000	145600000	130250000	86537000	58785000	50866000	27411000	57132000	73672000	58990000	57465000	26900000	58603000	35694000	49840000	58534000	57181000	40184000	21506000	153370000	141920000	140150000	53573000	47530000	45449000	94981	V-type proton ATPase 116 kDa subunit a isoform X4 [Carassius auratus]
221	1221	XP_026124997.1	1.47	14	9	9	Carbamidomethylation	101430000	77453000	48700000	72526000	66063000	92325000	98212000	34760000	86514000	81370000	79954000	90005000	65188000	91223000	64881000	73812000	65431000	29453000	62494000	52188000	68091000	68411000	20916000	57931000	53176000	64430000	69474000	59259000	63653000	44288000	77434000	78636000	81986000	58788000	53705000	60221000	65033	neurofilament light polypeptide-like [Carassius auratus]
222	559	XP_026099122.1	0.52	2	1	1		2566900	11093000	1327200	6838400	7911600	3289500	6827000	5240400	5836500	0	3753000	4612600	13282000	0	0	2566900	11093000	1327200	6838400	7911600	3289500	6827000	5240400	5836500	0	3753000	4612600	13282000	0	0	5947300	5298300	7216000	5947300	5298300	7216000	72293	endoplasmic reticulum chaperone BiP [Carassius auratus]
223	1640	XP_026124844.1	0.45	35	9	9		82884000	96628000	49685000	125870000	125860000	89117000	84015000	63361000	88759000	82073000	82468000	73043000	99064000	117130000	75422000	56648000	66429000	34085000	75529000	75591000	62083000	59241000	46663000	56756000	51586000	53612000	45829000	64213000	66710000	49390000	96186000	81465000	89424000	61656000	55266000	55951000	32681	voltage-dependent anion-selective channel protein 2-like isoform X1 [Carassius auratus]
224	348	XP_026101888.1	3.88	11	6	6	Carbamidomethylation	67909000	57526000	33244000	49674000	64322000	76690000	53390000	27431000	73219000	50270000	57828000	68671000	80665000	72701000	45823000	58624000	43152000	29017000	38437000	49095000	62612000	34011000	20886000	56673000	44024000	43620000	49123000	64495000	64817000	40834000	54535000	56200000	66101000	43665000	43641000	52578000	116142	sarcoplasmic/endoplasmic reticulum calcium ATPase 2-like [Carassius auratus]
225	784	XP_026089931.1	4.46	46	19	19	Carbamidomethylation	422920000	376030000	322960000	451600000	334760000	413690000	312710000	311540000	326790000	286830000	387580000	345530000	427260000	322780000	342270000	182510000	144300000	112650000	203690000	109110000	196640000	137040000	121710000	114600000	103400000	200930000	166630000	212230000	118400000	154310000	386380000	336960000	366950000	150450000	135070000	170500000	57691	T-complex protein 1 subunit zeta [Carassius auratus]
226	2705	XP_026131415.1	8.5	15	5	5	Carbamidomethylation	265610000	175670000	150010000	204020000	299040000	299510000	217380000	191460000	214550000	272520000	274880000	253190000	256200000	364340000	312390000	191390000	139620000	121800000	173630000	240000000	216220000	164370000	166370000	162790000	195710000	205800000	190120000	195160000	276230000	223360000	225260000	243750000	297420000	179680000	185760000	223360000	50664	probable glutamate receptor [Carassius auratus]
227	433	XP_026101524.1	2.91	23	7	7	Carbamidomethylation	108130000	95588000	72747000	127730000	106900000	85382000	80908000	52252000	93733000	83086000	87651000	86462000	94838000	115650000	95450000	86388000	72581000	52658000	82612000	73314000	69829000	65111000	37298000	75043000	61215000	70073000	69587000	69684000	75812000	64589000	105250000	82148000	103110000	73511000	61699000	69949000	59386	T-complex protein 1 subunit theta isoform X2 [Carassius auratus]
228	113	XP_026071736.1	3.76	3	1	1		3953300	0	2160600	3767300	4711500	0	1911100	2197300	4008600	2247700	3021500	2196000	0	5500000	2562200	3953300	0	2160600	3767300	4711500	0	1911100	2197300	4008600	2247700	3021500	2196000	0	5500000	2562200	3648200	2591100	3319900	3648200	2591100	3319900	65457	rap1 GTPase-GDP dissociation stimulator 1-like isoform X1 [Carassius auratus]
229	2207	XP_026090030.1	6.27	4	2	2		440090	2193400	692300	5585800	2647900	167910	1433100	1578400	1404100	290670	825380	1017600	2442500	419880	268290	440090	1071700	607450	3334700	1687800	0	580980	858250	802140	290670	528250	625330	776130	419880	268290	2532800	1218500	1308800	1428300	633010	523580	54139	calcium/calmodulin-dependent protein kinase type II subunit alpha isoform X2 [Carassius auratus]
230	1869	XP_026137086.1	9.44	2	1	1		4229200	0	1940500	1139600	0	0	0	973730	0	2529800	0	0	0	0	3388600	4229200	0	1940500	1139600	0	0	0	973730	0	2529800	0	0	0	0	3388600	2436400	1751800	3388600	2436400	1751800	3388600	65721	WD repeat-containing protein 1-like isoform X2 [Carassius auratus]
232	1217	XP_026085248.1	2.39	8	3	3	Carbamidomethylation	26868000	18975000	19874000	17274000	34382000	28358000	24098000	10534000	29731000	23669000	32907000	36968000	23773000	28712000	17613000	26868000	18975000	19874000	17274000	34382000	28358000	24098000	10534000	29731000	23669000	32907000	36968000	23773000	28712000	17613000	23475000	23278000	27995000	23475000	23278000	27995000	63846	asparagine--tRNA ligase cytoplasmic-like isoform X2 [Carassius auratus]
233	358	XP_026132680.1	11.53	12	12	12	Carbamidomethylation	15112000	17118000	8556600	16176000	20256000	18072000	25825000	9980700	25666000	11427000	20937000	18155000	25033000	9546100	16134000	5060500	4914300	4423600	4249600	5213000	7974700	13470000	2991100	12315000	6088400	9479200	9233800	9369800	3798300	11257000	18594000	22109000	22614000	5761600	12180000	11753000	188380	clathrin heavy chain 1-like isoform X4 [Carassius auratus]
234	370	XP_026090570.1	2.14	10	10	10	Carbamidomethylation	69084000	40785000	66767000	43068000	62709000	67512000	51710000	57261000	44658000	60987000	62543000	66260000	56508000	73508000	59883000	40023000	27695000	34947000	25647000	30349000	37961000	32496000	34894000	31058000	30362000	35711000	35373000	29478000	35047000	36578000	58410000	59377000	68079000	31732000	33354000	34437000	274666	fatty acid synthase-like [Carassius auratus]
235	436	XP_026069410.1	3.58	24	9	9	Carbamidomethylation	36979000	69297000	11942000	50277000	86503000	62623000	72779000	55943000	72505000	22645000	45751000	47900000	112970000	51742000	31367000	21370000	38893000	6189400	21875000	50379000	47148000	48871000	39930000	51370000	13687000	31197000	37723000	66754000	41553000	28195000	58454000	60658000	66140000	32221000	42573000	43140000	61158	phosphoglucomutase-1-like [Carassius auratus]
236	969	XP_026116033.1	4.83	1	1	1	Carbamidomethylation	0	0	1805800	5636000	3802600	0	1485900	1265700	2493900	2423200	0	1630000	1903100	0	0	0	0	1805800	5636000	3802600	0	1485900	1265700	2493900	2423200	0	1630000	1903100	0	0	3748100	1917200	1766500	3748100	1917200	1766500	127760	plasma membrane calcium-transporting ATPase 3 isoform X4 [Carassius auratus]
237	1120	XP_026088367.1	2.86	14	4	4	Carbamidomethylation	54893000	51105000	33920000	70948000	93245000	48326000	57886000	41529000	66480000	45123000	60556000	60212000	89641000	60072000	41842000	54893000	48255000	33920000	68944000	88783000	48326000	56031000	40127000	64305000	45123000	58595000	59143000	82996000	60072000	41842000	62064000	52593000	64003000	58959000	50782000	60778000	72136	succinate dehydrogenase [ubiquinone] flavoprotein subunit mitochondrial [Carassius auratus]
238	1259	XP_026106564.1	7.09	5	3	3		36323000	29481000	24743000	32215000	34713000	29595000	24638000	17675000	30072000	26975000	28411000	30891000	29742000	31932000	17215000	26772000	20766000	17790000	22654000	26736000	21217000	17319000	13471000	20968000	20327000	19357000	18963000	17174000	24668000	9691200	31495000	25791000	29693000	22944000	18660000	20025000	63188	asparagine--tRNA ligase cytoplasmic-like [Carassius auratus]
239	1834	XP_026146084.1	8.46	29	5	5	Carbamidomethylation	64017000	60326000	35659000	44425000	51436000	65049000	68513000	18572000	76326000	53744000	71596000	84755000	86129000	56092000	51975000	49917000	47070000	27917000	32563000	38378000	51945000	53403000	13353000	62031000	47197000	57022000	65916000	64959000	44004000	41539000	53766000	59693000	75409000	41763000	48838000	58723000	33149	beta-soluble NSF attachment protein-like isoform X1 [Carassius auratus]
240	613	XP_026141260.1	1.57	9	2	2		6439900	6970600	5484000	5900900	20861000	5302600	9035000	14125000	11426000	6568100	6479900	5278500	28693000	12903000	13750000	6439900	6970600	5484000	5900900	20861000	5302600	9035000	14125000	11426000	6568100	6479900	5278500	28693000	12903000	13750000	9131300	9291400	13421000	9131300	9291400	13421000	57181	methylmalonate-semialdehyde dehydrogenase [acylating] mitochondrial-like [Carassius auratus]
241	1222	XP_026128640.1	7.78	16	3	3	Carbamidomethylation; Acetylation (Protein N-term)	21346000	15416000	19043000	14406000	14537000	18304000	17145000	15752000	19071000	16823000	21170000	18080000	17269000	19433000	20491000	21346000	15416000	19043000	14406000	14537000	18304000	17145000	15752000	19071000	16823000	21170000	18080000	17269000	19433000	20491000	16950000	18096000	22402000	16950000	18096000	22402000	47333	actin-related protein 3-like [Carassius auratus]
242	1105	XP_026076523.1	12.13	5	2	2		27884000	30953000	25775000	56419000	39226000	21884000	19917000	22064000	23502000	23189000	21140000	20816000	23194000	41176000	24718000	27884000	30953000	25775000	56419000	39226000	21884000	19917000	22064000	23502000	23189000	21140000	20816000	23194000	41176000	24718000	36052000	22111000	26209000	36052000	22111000	26209000	75840	synapsin-2 isoform X2 [Carassius auratus]
243	769	XP_026062708.1	12.66	5	1	1		0	0	2999300	0	0	0	3717900	5355300	6724500	1580000	4631400	6022400	0	5384500	3721500	0	0	2999300	0	0	0	3717900	5355300	6724500	1580000	4631400	6022400	0	5384500	3721500	2999300	4344400	4940000	2999300	4344400	4940000	49656	AP-2 complex subunit mu-A-like isoform X2 [Carassius auratus]
244	2415	XP_026134042.1	0.13	22	3	3	Carbamidomethylation	6604500	11469000	18999000	22373000	15261000	13126000	17148000	10072000	31103000	6525100	15004000	32294000	40718000	2475600	4726800	6604500	11469000	18999000	22373000	15261000	13126000	17148000	10072000	31103000	6525100	15004000	32294000	40718000	2475600	4726800	16425000	17175000	19783000	16425000	17175000	19783000	28838	phosphoglycerate mutase 1-like [Carassius auratus]
245	795	XP_026134335.1	2.41	4	1	1		3562700	2185300	3334800	2738600	4754600	3508200	559190	3053900	5154600	2897500	3635700	498140	2522500	2782700	3585000	3562700	2185300	3334800	2738600	4754600	3508200	559190	3053900	5154600	2897500	3635700	498140	2522500	2782700	3585000	3315200	3034700	2604800	3315200	3034700	2604800	59298	calcium/calmodulin-dependent protein kinase type II subunit gamma isoform X24 [Carassius auratus]
246	192	XP_026135594.1	10.62	11	5	5	Carbamidomethylation	11110000	7532600	6172100	12743000	10363000	6255500	6727300	4323400	7379000	7581300	5834100	8783700	7639800	13487000	9706200	8088700	6477000	5020300	12418000	9896800	4370400	5829400	3730000	6173300	5324800	4275500	6809400	6004100	10418000	7303100	10175000	7173600	9427300	8662000	5714600	6962100	73155	stress-70 protein mitochondrial-like [Carassius auratus]
247	615	XP_026058136.1	9.78	3	1	1	Acetylation (Protein N-term)	7862000	6312400	4598500	9392800	9116500	5274900	5092300	4223500	4818900	5405800	4245800	5343100	4108900	8783000	3998200	7862000	6312400	4598500	9392800	9116500	5274900	5092300	4223500	4818900	5405800	4245800	5343100	4108900	8783000	3998200	7456500	4963100	5295800	7456500	4963100	5295800	49746	septin-7-like isoform X3 [Carassius auratus]
248	1369	XP_026059970.1	1.93	21	8	8	Carbamidomethylation; Acetylation (Protein N-term)	148380000	123000000	88194000	126450000	164840000	146500000	139510000	87777000	150210000	116090000	141500000	153080000	196870000	143350000	103110000	122060000	97786000	73191000	111670000	129190000	120430000	112130000	71281000	118990000	97457000	115230000	126460000	154560000	113550000	84328000	131280000	128020000	151380000	106780000	104060000	119350000	57783	calcium/calmodulin-dependent protein kinase type II delta 2 chain-like isoform X8 [Carassius auratus]
249	1841	XP_026066148.1	7.36	7	2	2		37901000	39245000	41872000	22522000	40899000	46867000	45347000	52005000	51620000	38949000	38188000	57416000	52611000	39625000	46678000	37901000	39245000	41872000	22522000	40899000	46867000	45347000	52005000	51620000	38949000	38188000	57416000	52611000	39625000	46678000	36488000	46957000	46904000	36488000	46957000	46904000	55640	clathrin coat assembly protein AP180-like isoform X2 [Carassius auratus]
250	1249	XP_026125204.1	6.31	1	1	1		0	245320	133180	36702	40752	132670	395370	365480	260010	123200	230940	607930	488970	61696	206330	0	245320	133180	36702	40752	132670	395370	365480	260010	123200	230940	607930	488970	61696	206330	113990	255350	319170	113990	255350	319170	143036	plasma membrane calcium-transporting ATPase 3-like isoform X1 [Carassius auratus]
251	1266	XP_026060401.1	1.13	49	16	16	Carbamidomethylation	118690000	124930000	107730000	138900000	149340000	120240000	113770000	106690000	144080000	108150000	109860000	99641000	176310000	161230000	107050000	48745000	65923000	39825000	66708000	72144000	55192000	59783000	49772000	73873000	34611000	52355000	40900000	99312000	41815000	29893000	131650000	119520000	135620000	58669000	54646000	53381000	54443	fascin-like [Carassius auratus]
253	442	XP_026100723.1	3.38	23	8	8	Carbamidomethylation	100040000	69910000	59160000	87584000	83251000	68840000	68431000	51661000	74608000	66759000	78539000	80356000	88991000	95927000	50298000	72257000	41911000	34150000	56632000	61990000	52882000	40643000	30966000	43566000	50936000	51178000	51239000	53926000	71933000	34947000	82877000	71490000	80538000	55232000	46426000	54360000	59407	T-complex protein 1 subunit theta-like isoform X2 [Carassius auratus]
254	1610	XP_026051241.1	3.01	35	7	7		126150000	247470000	66952000	262330000	299870000	143780000	201700000	59342000	235350000	108970000	164680000	179540000	144380000	164350000	89251000	89157000	189310000	57644000	216150000	241140000	94682000	130030000	40440000	164640000	77748000	105370000	118320000	87443000	116640000	59091000	203070000	162710000	161940000	158680000	114390000	109920000	30616	voltage-dependent anion-selective channel protein 1-like [Carassius auratus]
255	673	XP_026058137.1	9.39	3	1	1	Acetylation (Protein N-term)	6050600	4241700	3388900	7216100	6089100	3783500	3637100	3195600	4249900	3677600	4019700	4389500	4051900	8052400	3414200	6050600	4241700	3388900	7216100	6089100	3783500	3637100	3195600	4249900	3677600	4019700	4389500	4051900	8052400	3414200	5397300	3708700	4785500	5397300	3708700	4785500	49618	septin-7-like isoform X4 [Carassius auratus]
256	1526	XP_026052750.1	5.98	6	2	2	Acetylation (Protein N-term)	6750900	11583000	4959100	9570600	5684600	7655100	10021000	2618400	10291000	2789200	6566600	6992500	4532200	2611700	1082900	6750900	11583000	4959100	9570600	5684600	7655100	10021000	2618400	10291000	2789200	6566600	6992500	4532200	2611700	1082900	8474100	7147800	5263900	8474100	7147800	5263900	64109	asparagine--tRNA ligase cytoplasmic-like [Carassius auratus]
257	908	XP_026119625.1	1.22	9	2	2	Carbamidomethylation	0	7598000	3336900	2715400	14596000	13550000	2513300	7521500	7871700	16246000	10776000	3689500	15434000	0	7118800	0	7598000	3336900	2715400	14596000	13550000	2513300	7521500	7871700	16246000	10776000	3689500	15434000	0	7118800	17206000	12717000	13726000	17206000	12717000	13726000	59171	calcium/calmodulin-dependent protein kinase type II subunit beta-like isoform X39 [Carassius auratus]
258	313	XP_026063883.1	0.54	3	2	2		4411600	3038700	5761000	13809000	10193000	4836500	5522700	5413200	7693700	4632800	5386400	6057700	6139500	6174200	4741100	4411600	3038700	5761000	13809000	10193000	4836500	5522700	5413200	7693700	4632800	5386400	6057700	6139500	6174200	4741100	7442700	5619800	6051500	7442700	5619800	6051500	119802	ATP-citrate synthase [Carassius auratus]
259	1875	XP_026097967.1	1.5	16	6	6	Carbamidomethylation	133620000	107760000	87872000	101700000	103880000	111670000	106950000	99527000	98329000	89093000	101990000	97707000	116420000	98342000	107440000	125270000	90575000	84103000	82378000	84862000	99951000	90313000	85344000	82772000	83187000	89457000	87502000	90752000	89503000	99805000	108130000	101110000	104380000	93438000	88314000	91404000	67961	transketolase-like [Carassius auratus]
260	910	XP_026066607.1	0.49	8	3	3		35847000	23331000	16598000	25138000	28845000	29769000	29957000	16932000	28952000	23442000	30363000	18071000	26271000	25880000	19860000	35847000	23331000	16598000	25138000	28845000	29769000	29957000	16932000	28952000	23442000	30363000	18071000	26271000	25880000	19860000	27662000	25810000	24828000	27662000	25810000	24828000	59230	calcium/calmodulin-dependent protein kinase type II subunit beta-like isoform X23 [Carassius auratus]
261	2140	XP_026052706.1	3.06	39	8	8	Carbamidomethylation	93753000	103790000	73119000	73887000	80727000	99790000	110820000	72015000	86903000	71887000	91077000	89923000	108000000	55523000	67900000	67248000	68221000	49150000	28278000	42427000	73164000	86496000	53474000	60892000	45877000	68304000	67355000	77510000	29887000	44478000	85449000	90522000	85084000	51065000	63981000	57507000	35589	annexin A13-like [Carassius auratus]
262	392	XP_026113067.1	0.14	1	1	1		7765800	6204200	8576500	4382200	3944200	5803000	6084400	7046900	7130500	4764100	7044500	7301300	5890900	4178500	5826300	7765800	6204200	8576500	4382200	3944200	5803000	6084400	7046900	7130500	4764100	7044500	7301300	5890900	4178500	5826300	6174600	6517800	6048300	6174600	6517800	6048300	229237	myosin-10 isoform X3 [Carassius auratus]
263	968	XP_026096528.1	4.29	5	2	2		45786000	50838000	16217000	77093000	58649000	39573000	36971000	32988000	40198000	34425000	43243000	36593000	51713000	47873000	33294000	45786000	50838000	16217000	77093000	58649000	39573000	36971000	32988000	40198000	34425000	43243000	36593000	51713000	47873000	33294000	57733000	37006000	42682000	57733000	37006000	42682000	76279	synapsin-2-like [Carassius auratus]
264	1004	XP_026068847.1	2.44	52	16	16	Carbamidomethylation	124860000	108170000	70228000	158450000	109740000	107530000	118570000	53439000	112010000	94441000	95754000	102570000	141470000	112230000	100350000	59922000	38603000	40693000	90624000	44870000	47239000	51040000	21230000	54551000	51028000	47990000	41765000	50539000	63553000	69310000	129980000	105010000	123830000	66958000	48420000	57070000	47892	adenosylhomocysteinase B-like [Carassius auratus]
265	1315	XP_026081241.1	2.25	19	5	5	Acetylation (Protein N-term)	88045000	74352000	51129000	100150000	72294000	70777000	67407000	52492000	74304000	59414000	64755000	69512000	70671000	72056000	57692000	68816000	59580000	40937000	93683000	62575000	57132000	55813000	44164000	64767000	47876000	53035000	59852000	59324000	61585000	47676000	77940000	65471000	67589000	65864000	54543000	56947000	49565	septin-6 isoform X4 [Carassius auratus]
266	371	XP_026087476.1	4.57	13	7	7	Carbamidomethylation; Oxidation (M)	60438000	37153000	41962000	30028000	39363000	47834000	42581000	35177000	41437000	41808000	47261000	44683000	41242000	51264000	45554000	54633000	31196000	38703000	22237000	31439000	43010000	36501000	29585000	35211000	38038000	41387000	40975000	33287000	46318000	42315000	43397000	42369000	46681000	36721000	36763000	40856000	97151	programmed cell death 6-interacting protein-like isoform X1 [Carassius auratus]
267	744	XP_026120783.1	3.04	21	6	6	Carbamidomethylation	54935000	41114000	30286000	23148000	33883000	44734000	51927000	31047000	48207000	32170000	49434000	48636000	49355000	36290000	34669000	46097000	34780000	26695000	20684000	26933000	40969000	41547000	26289000	36941000	25490000	39822000	43833000	36379000	31279000	31125000	38469000	43049000	48592000	31038000	34247000	36488000	61380	phosphoglucomutase-1-like [Carassius auratus]
268	2416	XP_026085485.1	9.95	48	8	8	Carbamidomethylation; Acetylation (Protein N-term)	389710000	383070000	329720000	642040000	525800000	337440000	314030000	308970000	387690000	292770000	296740000	345320000	431410000	442350000	293740000	360910000	326680000	309530000	582180000	458570000	297940000	255620000	270550000	330840000	275350000	252510000	298250000	334170000	426980000	281720000	457390000	329550000	369050000	407580000	286060000	318730000	27886	14-3-3 protein zeta/delta [Carassius auratus]
269	1303	XP_026070860.1	1.61	8	2	2	Carbamidomethylation	60130000	40374000	30428000	40696000	56584000	48427000	40292000	27679000	51634000	42121000	37278000	35554000	52832000	41463000	27987000	60130000	40374000	30428000	40696000	56584000	48427000	40292000	27679000	51634000	42121000	37278000	35554000	52832000	41463000	27987000	45643000	42030000	39023000	45643000	42030000	39023000	47527	aspartate aminotransferase mitochondrial-like [Carassius auratus]
270	1216	XP_026079508.1	7.77	21	6	6		42623000	40487000	30294000	29521000	31850000	19242000	36458000	19050000	39109000	34979000	28788000	32830000	39063000	22588000	24885000	32507000	26740000	23830000	22400000	21181000	19242000	21272000	12317000	23306000	29721000	19262000	19024000	23571000	19059000	22282000	37993000	34405000	31497000	26966000	21172000	22039000	54699	alpha-internexin-like [Carassius auratus]
271	349	XP_026094994.1	2.52	16	21	21	Carbamidomethylation	36579000	45691000	30810000	51190000	50603000	42049000	30963000	31998000	35315000	32886000	33718000	47840000	37165000	36946000	22854000	13565000	10614000	11904000	10337000	13591000	12526000	10049000	11444000	10963000	10224000	13646000	14861000	9126200	10078000	8171700	55105000	42697000	49565000	12002000	11041000	12571000	272555	talin-2-like isoform X3 [Carassius auratus]
272	666	XP_026066207.1	1.3	11	2	2	Acetylation (Protein N-term)	6081000	26172000	27127000	27692000	38032000	32403000	28295000	22538000	33976000	23728000	28952000	29227000	28455000	29787000	24394000	6081000	26172000	27127000	27692000	38032000	32403000	28295000	22538000	33976000	23728000	28952000	29227000	28455000	29787000	24394000	25021000	28188000	28163000	25021000	28188000	28163000	48892	ATP-dependent RNA helicase DDX39A [Carassius auratus]
273	569	XP_026067570.1	0.8	8	3	3	Carbamidomethylation	5051900	2186800	1441700	9082400	9501400	1359500	11454000	4718600	10362000	3916200	2039400	3049200	13685000	11241000	7764500	5051900	2186800	1441700	9082400	9501400	1359500	11454000	4718600	10362000	3916200	2039400	3049200	13685000	11241000	7764500	7871400	7964500	12900000	7871400	7964500	12900000	110781	sarcoplasmic/endoplasmic reticulum calcium ATPase 1-like [Carassius auratus]
274	676	XP_026091509.1	0.62	15	4	4		12937000	18826000	12498000	13263000	18465000	18482000	18428000	18015000	18933000	12680000	14918000	19448000	25843000	13607000	9333300	12937000	18111000	12498000	13263000	16803000	15902000	15178000	16327000	16118000	12680000	14918000	15873000	21498000	13189000	9052400	15911000	17824000	17061000	14723000	15241000	14906000	65969	glutaminase kidney isoform mitochondrial-like isoform X1 [Carassius auratus]
275	2002	XP_026056115.1	1.01	28	5	5	Carbamidomethylation	65581000	137100000	39450000	35167000	68491000	76759000	118290000	81032000	90561000	35889000	95031000	83098000	132770000	33318000	27619000	65467000	134750000	39450000	34715000	67206000	75789000	115220000	78366000	86616000	35550000	92462000	80048000	126870000	28971000	27436000	69368000	80506000	76514000	68318000	78308000	71156000	40599	protein NDRG2-like [Carassius auratus]
276	1911	XP_026077951.1	2.33	24	9	9	Carbamidomethylation	138430000	114970000	103550000	124480000	124960000	119010000	118930000	107720000	119310000	97688000	100200000	104100000	123040000	114200000	110770000	102410000	68507000	83739000	71576000	77296000	86360000	74847000	79829000	75232000	72039000	63240000	79383000	72418000	77578000	77834000	124890000	113210000	117090000	80706000	77661000	78699000	49275	annexin A4-like [Carassius auratus]
277	181	XP_026115071.1	5.93	17	6	6	Carbamidomethylation	26578000	17189000	9724900	13867000	23565000	24342000	22848000	13586000	26736000	22499000	22997000	24306000	29467000	26801000	18838000	26578000	14707000	9724900	12043000	18954000	23273000	20770000	11645000	24403000	22255000	21452000	22645000	20258000	26801000	18838000	19374000	22948000	27189000	16401000	20469000	22720000	79689	NADH-ubiquinone oxidoreductase 75 kDa subunit mitochondrial-like [Carassius auratus]
278	2129	XP_026059535.1	0.43	23	6	6		352790000	294550000	263000000	236420000	411260000	323910000	329030000	275620000	371010000	287150000	279120000	317210000	398990000	363410000	271520000	351630000	252610000	262450000	234220000	376380000	297540000	284170000	254310000	329660000	286770000	278170000	278930000	311090000	363020000	271350000	321790000	325190000	364900000	295460000	290490000	300510000	36245	malate dehydrogenase cytoplasmic-like [Carassius auratus]
279	1529	XP_026101283.1	6.18	5	1	1		9859100	11413000	7825000	24734000	16336000	8084600	7653800	9136400	9639500	8070300	7969400	4395800	9006700	14471000	10007000	9859100	11413000	7825000	24734000	16336000	8084600	7653800	9136400	9639500	8070300	7969400	4395800	9006700	14471000	10007000	14033000	8516900	9169900	14033000	8516900	9169900	39779	serine/threonine-protein phosphatase PP1-beta catalytic subunit-like [Carassius auratus]
280	279	XP_026137390.1	0.24	12	5	5	Carbamidomethylation	6114300	4529900	2161400	19974000	10413000	9363100	13696000	11579000	12548000	125390	12901000	15855000	24508000	1782000	908020	4873500	4529900	970990	18179000	7225700	6851400	11400000	8189800	10610000	125390	12901000	13588000	18848000	1782000	908020	12588000	11689000	15426000	10634000	9027400	11462000	99648	LOW QUALITY PROTEIN: 26S proteasome non-ATPase regulatory subunit 2-like [Carassius auratus]
281	162	XP_026128625.1	6.18	17	4	4	Carbamidomethylation; Acetylation (Protein N-term)	28808000	32086000	19248000	31309000	32739000	20351000	27932000	20332000	30726000	21700000	32561000	24489000	35719000	18702000	32231000	28808000	30776000	19248000	28133000	32739000	19397000	25474000	18190000	27580000	21700000	30655000	24489000	31238000	18702000	30191000	32197000	25937000	32297000	29953000	23762000	29488000	69946	plastin-2 [Carassius auratus]
282	1854	XP_026099862.1	3.46	15	4	4	Carbamidomethylation	45765000	52535000	29282000	48380000	48037000	45547000	45964000	36207000	43336000	27029000	44317000	32205000	56469000	28323000	20922000	45236000	49361000	28938000	47946000	47337000	44849000	43740000	34550000	42181000	27029000	43285000	31037000	52900000	28323000	20922000	44800000	39903000	37216000	43764000	38470000	35293000	27456	14-3-3 protein beta/alpha-B [Carassius auratus]
283	451	XP_026140313.1	13.63	12	5	5	Carbamidomethylation; Acetylation (Protein N-term)	23412000	12930000	9252700	14792000	10685000	16587000	20710000	5437700	11575000	8221900	23094000	24292000	38373000	14762000	18227000	20279000	8313800	7401300	13994000	7654000	13322000	16019000	2639500	8194900	7359900	19219000	20323000	33236000	13989000	17072000	16845000	16779000	23750000	13825000	13422000	20768000	92876	ubiquitin carboxyl-terminal hydrolase 5-like isoform X2 [Carassius auratus]
284	1607	XP_026145384.1	5.46	43	7	7	Carbamidomethylation	83079000	124670000	49830000	189540000	125470000	70800000	91951000	71536000	84540000	51168000	72223000	49467000	104930000	63704000	47310000	66617000	101110000	37585000	176300000	113010000	60174000	70318000	56439000	68751000	39349000	57499000	32108000	77767000	57592000	38208000	119290000	74324000	69570000	103690000	59006000	52635000	26848	triosephosphate isomerase A [Carassius auratus]
285	467	XP_026141503.1	4.05	20	9	9	Carbamidomethylation	39732000	38593000	31090000	26546000	33768000	43798000	44771000	38889000	36017000	29998000	41293000	39255000	45327000	25166000	32992000	30490000	26941000	26908000	14654000	20016000	33425000	30549000	32081000	24736000	24060000	31386000	30805000	29624000	21508000	29397000	34462000	39085000	37699000	23802000	28970000	28544000	75150	heat shock 70 kDa protein 12A-like [Carassius auratus]
286	1110	XP_026080059.1	1.11	17	4	4		197450000	130220000	91866000	138950000	169590000	167580000	146370000	77687000	163510000	139090000	150650000	172050000	130170000	170970000	122480000	182300000	113710000	83679000	116000000	148480000	155650000	135330000	67256000	149220000	129930000	138140000	159230000	117210000	156580000	113520000	145610000	138850000	149260000	128830000	127480000	136940000	35467	sideroflexin-1-like [Carassius auratus]
287	2407	XP_026146763.1	1.12	7	2	2	Carbamidomethylation	7662500	15052000	5421300	4597600	6998100	10713000	15915000	12316000	8845200	4246900	11219000	10568000	16214000	1742200	3359200	5234100	13589000	4020500	3665600	5522400	7601600	13662000	10216000	7218200	2104100	8526200	8179200	15816000	891460	1662200	7946400	10407000	8620400	6406300	8160400	7015100	27647	14-3-3 protein zeta-like [Carassius auratus]
288	1530	XP_026141896.1	8.18	5	1	1		11687000	12847000	9331000	25697000	17986000	9603900	8594000	9485900	10031000	9083100	8643200	4379300	10540000	17560000	10517000	11687000	12847000	9331000	25697000	17986000	9603900	8594000	9485900	10031000	9083100	8643200	4379300	10540000	17560000	10517000	15510000	9359600	10328000	15510000	9359600	10328000	39779	serine/threonine-protein phosphatase PP1-beta catalytic subunit-like [Carassius auratus]
289	2674	XP_026130020.1	3.14	21	3	3	Carbamidomethylation	10257000	14416000	12589000	21723000	13581000	12229000	13823000	8354900	15338000	14849000	12757000	19103000	9089700	26293000	17993000	8538000	6406300	9014000	8938100	10850000	9184100	8291400	2190700	9206800	12344000	6831400	13681000	6610200	19107000	15325000	15432000	13710000	19336000	8749300	8743100	13416000	25125	ras-related protein Rab-3C-like isoform X2 [Carassius auratus]
290	1234	XP_026073364.1	10.83	7	1	1	Carbamidomethylation	4357500	3431700	1971800	1707500	3751900	1417800	424390	1195000	0	2181100	1484900	1228200	2732500	1456100	1514700	4357500	3431700	1971800	1707500	3751900	1417800	424390	1195000	0	2181100	1484900	1228200	2732500	1456100	1514700	3044100	1304600	1683300	3044100	1304600	1683300	47349	actin-related protein 3 [Carassius auratus]
291	552	XP_026062120.1	2.51	10	3	3		2241700	5310100	2220500	10275000	7493000	2872700	4241500	4290900	4436700	1187000	2703300	2813500	8599700	2336200	1361600	2241700	5310100	2220500	10275000	7493000	2872700	4241500	4290900	4436700	1187000	2703300	2813500	8599700	2336200	1361600	6208200	3726000	4615500	6208200	3726000	4615500	53384	V-type proton ATPase subunit H-like isoform X2 [Carassius auratus]
292	446	XP_026127203.1	2.84	30	14	14	Carbamidomethylation	73075000	79037000	58646000	74751000	91833000	84858000	90961000	79815000	104110000	63848000	88682000	79012000	172600000	66418000	69148000	37820000	42234000	26250000	33804000	41614000	36246000	38729000	30493000	40433000	31539000	37434000	32072000	62542000	39455000	39920000	78892000	85562000	108370000	36344000	35488000	42285000	71455	glutaminase kidney isoform mitochondrial-like isoform X3 [Carassius auratus]
293	2294	XP_026075287.1	5.47	71	11	11	Carbamidomethylation; Acetylation (Protein N-term)	380300000	386560000	327620000	495060000	453260000	401240000	339570000	336460000	454910000	336440000	379080000	396030000	355090000	414490000	330150000	281010000	260400000	242000000	297590000	276480000	300970000	239670000	237810000	328490000	232400000	266050000	276350000	220760000	241660000	206100000	425950000	381460000	386270000	272960000	271140000	246950000	27948	14-3-3 protein gamma-like [Carassius auratus]
294	1592	XP_026106169.1	1.43	6	2	2	Carbamidomethylation	12679000	16606000	9652400	18501000	22927000	14145000	18798000	9326300	21581000	13620000	17692000	22034000	21097000	15137000	12094000	12679000	16606000	9652400	18501000	22927000	14145000	18798000	9326300	21581000	13620000	17692000	22034000	21097000	15137000	12094000	16073000	15494000	17611000	16073000	15494000	17611000	54600	fascin-like [Carassius auratus]
295	1620	XP_026134224.1	2.94	11	2	2		124380000	82710000	85769000	60299000	89386000	107410000	101250000	64974000	100710000	94183000	102630000	105580000	171330000	71210000	111940000	124380000	82710000	85769000	60299000	89386000	107410000	101250000	64974000	100710000	94183000	102630000	105580000	171330000	71210000	111940000	88508000	93707000	112540000	88508000	93707000	112540000	50474	elongation factor 1-alpha 1-like [Carassius auratus]
296	979	XP_026143221.1	3.1	10	6	6	Carbamidomethylation; Acetylation (Protein N-term)	28617000	27210000	19911000	12023000	20651000	27846000	31847000	26203000	23749000	19251000	30673000	33872000	38287000	15708000	19958000	22397000	17957000	17611000	8002300	12407000	20544000	21623000	20119000	14557000	14709000	21865000	24080000	23392000	13538000	16806000	21822000	25977000	28093000	15675000	18310000	19936000	107139	alanine--tRNA ligase cytoplasmic-like isoform X2 [Carassius auratus]
297	669	XP_026142635.1	6.63	3	1	1		4347900	6621000	4209900	15437000	8110800	4165300	4504800	5734700	5027500	2857800	4264700	3278900	5082400	4981300	3108000	4347900	6621000	4209900	15437000	8110800	4165300	4504800	5734700	5027500	2857800	4264700	3278900	5082400	4981300	3108000	7745300	4458000	4143100	7745300	4458000	4143100	55133	V-type proton ATPase subunit H isoform X1 [Carassius auratus]
298	2216	XP_026059645.1	12.13	7	1	1	Acetylation (Protein N-term)	1868800	0	0	1982100	0	2417800	0	0	0	0	2743200	2144100	1609900	1468200	3659800	1868800	0	0	1982100	0	2417800	0	0	0	0	2743200	2144100	1609900	1468200	3659800	1925500	2417800	2325000	1925500	2417800	2325000	33041	ADP/ATP translocase 1 [Carassius auratus]
299	381	XP_026128941.1	26.11	2	2	2		2114800	1787300	1629700	3481100	2267900	575580	393730	840290	1134400	482180	853490	821500	1127800	619800	1900900	2114800	1787300	1629700	3481100	2267900	575580	393730	840290	1134400	482180	853490	821500	1127800	619800	1900900	2725800	1218200	1806700	2725800	1218200	1806700	271171	talin-1 isoform X4 [Carassius auratus]
300	2125	XP_026069751.1	3.49	38	11	11	Carbamidomethylation	96064000	67292000	36267000	62986000	90538000	75656000	93392000	38167000	92003000	75822000	79660000	90706000	80592000	84606000	65476000	65190000	36259000	27650000	36441000	47658000	42708000	57921000	15089000	49615000	55688000	50125000	67563000	36395000	65034000	45365000	79120000	78916000	84976000	42640000	44204000	52896000	52193	cytochrome b-c1 complex subunit 1 mitochondrial [Carassius auratus]
301	951	XP_026052146.1	1.92	19	14	14	Carbamidomethylation; Acetylation (Protein N-term)	196150000	141690000	63152000	156580000	95165000	160250000	113090000	78534000	92947000	136040000	93010000	57834000	97916000	165300000	86419000	114210000	61852000	28365000	66898000	42271000	91279000	43654000	36884000	38189000	79995000	38868000	17440000	41733000	98828000	37211000	157090000	143790000	111880000	79718000	83035000	52969000	80045	neurofilament light polypeptide-like [Carassius auratus]
302	674	XP_026055910.1	10.14	53	16	16	Carbamidomethylation	502020000	369080000	331350000	400750000	541160000	408420000	370720000	270410000	468850000	339490000	432070000	410480000	577350000	480280000	400380000	239730000	135410000	170260000	106770000	254100000	143210000	121270000	101840000	133210000	160090000	186020000	129670000	176870000	238350000	174250000	435720000	385640000	473060000	181250000	131920000	181030000	51812	citrate synthase mitochondrial [Carassius auratus]
303	905	XP_026081808.1	0.66	46	13	13	Carbamidomethylation; Acetylation (Protein N-term)	287010000	229020000	133460000	273080000	273590000	285070000	253170000	185630000	235100000	228770000	239320000	167260000	250520000	294190000	161310000	213700000	158420000	108620000	161290000	189220000	218080000	185300000	121810000	166560000	169730000	171650000	122740000	183810000	204020000	115040000	250990000	238740000	226410000	166250000	172300000	159450000	39958	fructose-bisphosphate aldolase C-A [Carassius auratus]
304	2062	XP_026084315.1	2.71	4	1	1		17315000	18862000	19805000	13033000	17136000	21216000	19840000	22825000	17302000	15486000	18938000	24421000	23003000	13664000	16835000	17315000	18862000	19805000	13033000	17136000	21216000	19840000	22825000	17302000	15486000	18938000	24421000	23003000	13664000	16835000	17230000	19334000	19372000	17230000	19334000	19372000	61624	clathrin coat assembly protein AP180-like isoform X3 [Carassius auratus]
305	3004	XP_026081349.1	4.39	45	7	7	Acetylation (Protein N-term); Oxidation (M)	1070300000	1019100000	789680000	1130200000	1192000000	881170000	892260000	622800000	1028800000	841740000	882340000	857040000	983680000	1023100000	765930000	866070000	855380000	558190000	918030000	1071800000	710660000	750740000	455080000	858370000	595600000	732620000	732570000	857760000	807950000	490520000	1047900000	864950000	918000000	857650000	674090000	729260000	18717	cofilin-2-like [Carassius auratus]
306	1817	XP_026105732.1	5.28	15	3	3		3796300	3066700	1991800	3751900	3683700	783620	2100200	1670800	3703600	8164100	1899600	4011800	6407800	10572000	8815000	3796300	3066700	1991800	3751900	3683700	783620	2100200	1670800	3703600	8164100	1899600	4011800	6407800	10572000	8815000	5421100	4259800	9528100	5421100	4259800	9528100	54537	alpha-internexin-like [Carassius auratus]
307	465	XP_026144459.1	1.35	9	5	5	Carbamidomethylation	13352000	13227000	1413100	8579700	17581000	9474800	11913000	6039300	14270000	9189700	13396000	6130500	14083000	3999500	6822700	11001000	10024000	1034000	4771700	12768000	7894100	10336000	3937900	11182000	8554500	11166000	4362400	10061000	3077600	6822700	13386000	10626000	12058000	10152000	8380900	9481300	95893	programmed cell death 6-interacting protein-like isoform X2 [Carassius auratus]
308	958	XP_026126607.1	40.59	30	6	6	Carbamidomethylation	11509000	11123000	10187000	8084000	13727000	15160000	15571000	13064000	19593000	9378900	19121000	20956000	23433000	21794000	22379000	5283400	6053300	6269900	4287400	5703700	7890200	7921300	7175800	13743000	6007700	12459000	15669000	13944000	20223000	18706000	10926000	19176000	22409000	5519500	13170000	16200000	44815	cAMP-dependent protein kinase type II-alpha regulatory subunit-like [Carassius auratus]
309	616	XP_026130278.1	2.23	25	7	7	Carbamidomethylation	79747000	86509000	69871000	71110000	68688000	77178000	73148000	55176000	80784000	64597000	76101000	72639000	103920000	63406000	49055000	64995000	71820000	58632000	53300000	49223000	63401000	52762000	44708000	59004000	49441000	62908000	59999000	73680000	45214000	40425000	76709000	71962000	76778000	59952000	53863000	59828000	60113	calcium/calmodulin-dependent protein kinase type II subunit beta isoform X28 [Carassius auratus]
312	1125	XP_026059921.1	11.68	19	7	7	Carbamidomethylation	128870000	49431000	34287000	44731000	62570000	84506000	100850000	17164000	108240000	72405000	109790000	122250000	137910000	123470000	77007000	122240000	43335000	25990000	36114000	50498000	77831000	95139000	13310000	98114000	63618000	102730000	112550000	126400000	114810000	71160000	66582000	82346000	115140000	57667000	74479000	105530000	74106	dihydropyrimidinase-related protein 1-like isoform X1 [Carassius auratus]
313	1853	XP_026118773.1	5.46	25	4	4	Carbamidomethylation	149820000	128790000	117970000	210360000	216150000	128980000	130780000	114290000	152480000	123750000	131040000	123060000	173150000	214450000	126470000	147010000	127930000	115680000	209240000	216150000	126580000	130780000	113500000	152480000	121270000	129870000	121800000	173150000	210750000	124800000	169140000	130810000	155530000	167370000	128920000	153570000	41893	glutamine synthetase [Carassius auratus]
314	3324	XP_026064928.1	2.09	61	14	14	Carbamidomethylation; Oxidation (M)	882190000	812090000	469870000	957960000	975240000	706860000	822010000	634880000	779840000	512140000	732410000	628680000	1025200000	677450000	586040000	578490000	472790000	291040000	512250000	528340000	444010000	505390000	287800000	459260000	302590000	480410000	428420000	574990000	389430000	318600000	844430000	702900000	747460000	476580000	399810000	438370000	23527	glutathione S-transferase P-like [Carassius auratus]
315	490	XP_026066242.1	3.56	5	6	6		6667600	5442000	3968800	7925700	8329600	4515300	4698000	3063600	4957600	5039700	4026200	3394100	4480000	5656100	3830000	4821200	1738700	3040200	4321500	4752900	3547800	2426900	1264500	2773000	4097000	2081900	2461300	1381500	3600300	3501400	6967900	4908900	5141400	3734900	3026900	2813100	227312	myosin-9-like isoform X2 [Carassius auratus]
316	1493	XP_026118044.1	5.02	13	6	6		60688000	42599000	26097000	44338000	30672000	46994000	37724000	16258000	32078000	23439000	45747000	36128000	25697000	29524000	34394000	49049000	32437000	22300000	42405000	26021000	34748000	25944000	11882000	27671000	18568000	36105000	29324000	12960000	28477000	30273000	41583000	33047000	38163000	34909000	25019000	29458000	63209	neurofilament light polypeptide-like [Carassius auratus]
317	1296	XP_026082306.1	0.39	14	7	7	Carbamidomethylation	67444000	51148000	40941000	40647000	71629000	59864000	47536000	41765000	50336000	47380000	46348000	46568000	55318000	40518000	44740000	32151000	33449000	22218000	25344000	48227000	32135000	31052000	28525000	30573000	25080000	25827000	23322000	42707000	30474000	26056000	54421000	50789000	48089000	32337000	29473000	29677000	88519	echinoderm microtubule-associated protein-like 2 isoform X1 [Carassius auratus]
318	511	XP_026107782.1	2.35	37	9	9	Carbamidomethylation	123510000	57159000	47462000	64350000	74809000	58009000	95753000	23194000	68813000	77595000	79747000	108150000	101030000	80706000	61607000	100240000	41508000	29748000	45943000	58014000	36000000	77960000	7981100	44317000	48936000	55261000	85883000	74415000	51127000	29875000	76819000	75403000	94724000	55090000	50014000	60836000	62425	dihydropyrimidinase-related protein 4-like isoform X2 [Carassius auratus]
319	750	XP_026067157.1	7.55	11	5	5		145180000	93460000	56572000	93742000	81517000	156850000	137370000	65177000	119080000	90873000	133370000	160350000	189550000	104570000	103650000	143510000	93460000	56572000	70352000	81517000	152580000	131540000	60873000	119080000	90873000	126560000	148460000	173500000	102670000	100020000	104490000	116060000	139810000	89083000	110990000	130240000	120539	electrogenic sodium bicarbonate cotransporter 1-like isoform X4 [Carassius auratus]
320	1485	XP_026077487.1	1.72	27	6	6	Carbamidomethylation	100830000	73312000	64784000	74503000	83986000	93707000	92838000	73115000	82283000	78519000	86156000	74222000	81926000	92125000	82140000	87815000	66117000	57577000	62068000	66659000	83774000	82286000	65876000	72953000	56510000	78627000	66416000	71686000	56880000	54806000	79482000	90916000	94335000	68047000	72280000	65683000	37365	guanine nucleotide-binding protein subunit beta-4-like [Carassius auratus]
321	2880	XP_026122346.1	1.21	17	4	4	Carbamidomethylation	41676000	92113000	43822000	48725000	69049000	69063000	89037000	79197000	96451000	25905000	76147000	76876000	109240000	21913000	23087000	39233000	83015000	43530000	43366000	61850000	66508000	83617000	76160000	89965000	25654000	71807000	73733000	99849000	21203000	23087000	59077000	71931000	62331000	54199000	68381000	57936000	40632	protein NDRG2 [Carassius auratus]
322	3266	XP_026111245.1	4.06	38	3	3		1188700000	1342400000	689390000	1498200000	1590200000	1067500000	1148000000	671790000	1101000000	699490000	1269800000	965560000	1571300000	1095500000	644690000	1188700000	1342400000	689390000	1498200000	1590200000	1067500000	1148000000	671790000	1101000000	699490000	1269800000	965560000	1571300000	1095500000	644690000	1262100000	937720000	1109400000	1262100000	937720000	1109400000	15157	fatty acid-binding protein brain-like [Carassius auratus]
323	699	XP_026062230.1	6.32	3	3	3		26878000	28818000	24728000	40716000	32112000	28080000	30841000	29842000	37815000	29200000	32610000	37879000	38571000	31930000	32670000	26878000	28818000	24728000	40716000	32112000	28080000	30841000	29842000	37815000	29200000	32610000	37879000	38571000	31930000	32670000	30651000	31598000	34732000	30651000	31598000	34732000	174320	glycogen debranching enzyme-like isoform X1 [Carassius auratus]
324	1860	XP_026130624.1	7.93	13	2	2	Carbamidomethylation	33838000	40906000	28569000	74757000	63514000	29439000	28096000	29401000	36713000	24343000	29355000	32065000	37462000	43897000	24863000	33838000	40906000	28569000	74757000	63514000	29439000	28096000	29401000	36713000	24343000	29355000	32065000	37462000	43897000	24863000	48317000	29598000	33528000	48317000	29598000	33528000	24911	ras-related protein Rab-3A-like [Carassius auratus]
325	1062	XP_026116498.1	0.24	2	1	1		1632900	0	1362400	0	0	543500	0	0	0	4652100	104950	168660	0	8563600	5511400	1632900	0	1362400	0	0	543500	0	0	0	4652100	104950	168660	0	8563600	5511400	1497700	2597800	3587200	1497700	2597800	3587200	116028	sarcoplasmic/endoplasmic reticulum calcium ATPase 2-like [Carassius auratus]
326	390	XP_026070150.1	6.24	1	2	2		7461600	11890000	4396800	17552000	13882000	4909300	7694100	6164700	8340100	2811300	5762500	6311700	12809000	4932600	2616800	7461600	11890000	4396800	17552000	13882000	4909300	7694100	6164700	8340100	2811300	5762500	6311700	12809000	4932600	2616800	11151000	6318100	7146400	11151000	6318100	7146400	228793	myosin-10-like isoform X3 [Carassius auratus]
327	2000	XP_026066831.1	5.75	23	4	4		36679000	37947000	25964000	41427000	35775000	33611000	30776000	34549000	23718000	31055000	31244000	27495000	28853000	32100000	34454000	20779000	18337000	16682000	23985000	18815000	19964000	13001000	15044000	9867300	20945000	16144000	13542000	12094000	18089000	25934000	37856000	30742000	32170000	22017000	15764000	17160000	22384	ras-related protein Rab-1B [Carassius auratus]
328	624	XP_026091308.1	6.84	5	2	2	Carbamidomethylation	5049800	5610300	2794600	6569600	8928300	6293800	2591000	6192300	4804400	2983100	3652800	2304800	4171300	4275800	3343000	5049800	5610300	2794600	6569600	8928300	6293800	2591000	6192300	4804400	2983100	3652800	2304800	4171300	4275800	3343000	5790500	4572900	4056700	5790500	4572900	4056700	95134	AMP deaminase 2-like isoform X1 [Carassius auratus]
329	1138	XP_026119343.1	0.52	10	4	4	Carbamidomethylation	47537000	32925000	22541000	32191000	35282000	35588000	48986000	12281000	40000000	31689000	38637000	53869000	53695000	38400000	32435000	37419000	32925000	17288000	30859000	35282000	31632000	48986000	11911000	38367000	21443000	35167000	51061000	53695000	20958000	17751000	38963000	36945000	47289000	31945000	32894000	35726000	84723	von Willebrand factor A domain-containing protein 5A-like isoform X7 [Carassius auratus]
330	560	XP_026121419.1	7.81	11	6	6		15320000	9410700	13680000	33775000	7883800	14515000	15194000	15612000	21628000	19258000	17813000	24034000	19703000	26105000	31436000	12190000	7295400	13680000	32018000	3479600	12749000	14141000	12983000	19563000	16849000	15072000	21483000	15862000	20771000	28620000	19255000	19228000	25399000	15838000	15257000	20362000	105049	dynamin-like 120 kDa protein mitochondrial isoform X7 [Carassius auratus]
331	423	XP_026143639.1	6.01	2	2	2		8523500	6436500	7238300	4780600	6777700	8949300	7911700	7427200	8492300	7630400	6908200	9790600	6892800	6756100	8974700	8523500	6436500	7238300	4780600	6777700	8949300	7911700	7427200	8492300	7630400	6908200	9790600	6892800	6756100	8974700	7060800	8227300	8263300	7060800	8227300	8263300	337641	dmX-like protein 2 isoform X3 [Carassius auratus]
332	440	XP_026073342.1	11.77	9	2	2		9283800	13644000	9038500	13318000	13559000	9149000	7353100	5252300	12541000	7738000	11479000	5379000	4122000	4769500	9902300	9283800	13644000	9038500	13318000	13559000	9149000	7353100	5252300	12541000	7738000	11479000	5379000	4122000	4769500	9902300	11769000	9185800	7757400	11769000	9185800	7757400	69962	plastin-2-like [Carassius auratus]
333	471	XP_026065848.1	13.73	8	3	3	Carbamidomethylation	9099500	5879400	5107800	7412500	8149400	7231900	6810300	3535200	8834400	7960000	7622200	10341000	13881000	11783000	10072000	9099500	5879400	5107800	7412500	8149400	7231900	6810300	3535200	8834400	7960000	7622200	10341000	13881000	11783000	10072000	8376900	7478000	10740000	8376900	7478000	10740000	91538	endoplasmin [Carassius auratus]
334	1649	XP_026079681.1	0.49	9	2	2		35978000	22718000	13781000	21431000	24993000	25635000	22992000	9905200	28264000	26080000	26913000	32286000	17333000	32720000	16102000	35978000	22718000	13781000	21431000	24993000	25635000	22992000	9905200	28264000	26080000	26913000	32286000	17333000	32720000	16102000	23780000	22575000	25071000	23780000	22575000	25071000	50278	elongation factor 1-alpha 1 [Carassius auratus]
335	1449	XP_026145651.1	0.3	23	9	9	Carbamidomethylation	37622000	30485000	20713000	30779000	23475000	39388000	45173000	20886000	32609000	18377000	36357000	27517000	49439000	30881000	16900000	26086000	26219000	16730000	21266000	17281000	25063000	28010000	16740000	27150000	17373000	23069000	23218000	38831000	17706000	14241000	33710000	38780000	38597000	22636000	26044000	24944000	85483	catenin beta-1-like [Carassius auratus]
336	1899	XP_026102271.1	3.86	6	1	1		1638300	1586600	1174400	731670	3456500	2052300	2015500	485940	2297800	1246200	4691900	3608100	2588800	1540800	1100400	1638300	1586600	1174400	731670	3456500	2052300	2015500	485940	2297800	1246200	4691900	3608100	2588800	1540800	1100400	1717500	1619500	2706000	1717500	1619500	2706000	33076	beta-soluble NSF attachment protein isoform X1 [Carassius auratus]
337	570	XP_026081395.1	5.53	9	3	3	Carbamidomethylation	16681000	17081000	20925000	26627000	22587000	17084000	13357000	18836000	18614000	18225000	16141000	20311000	17314000	23880000	19947000	16681000	17081000	20925000	26627000	22587000	17084000	13357000	18836000	18614000	18225000	16141000	20311000	17314000	23880000	19947000	20780000	17223000	19519000	20780000	17223000	19519000	91589	endoplasmin-like [Carassius auratus]
338	2731	XP_026088687.1	0.18	7	2	2	Carbamidomethylation	1970300	13239000	2249000	4789100	5984900	3823900	10690000	8570100	8704300	1308600	4827700	5234100	20104000	0	601710	1716000	10867000	2249000	4768900	5524800	3320800	7523200	7041800	7822400	1308600	4785600	4366600	13924000	0	601710	5801700	6923400	8282800	5025200	5403300	5919500	27731	14-3-3 protein beta/alpha-1-like [Carassius auratus]
339	1758	XP_026126437.1	5.36	51	13	13	Carbamidomethylation	158870000	174180000	105460000	287100000	257900000	132500000	143170000	116740000	165130000	101880000	145140000	88929000	163520000	153860000	113420000	95527000	84898000	61060000	157770000	130270000	80955000	76572000	59031000	88480000	61109000	81108000	57141000	85130000	95658000	71178000	197350000	131890000	135510000	105900000	73229000	78043000	30199	40S ribosomal protein S3a [Carassius auratus]
340	1432	XP_026139814.1	0.21	20	7	7	Carbamidomethylation	69121000	16238000	11404000	8521700	64475000	63806000	23828000	10889000	29326000	21727000	18698000	16518000	24172000	22893000	13704000	37339000	9148000	7069000	5080400	31510000	35543000	14133000	5443500	20897000	12770000	12231000	9851400	18327000	17542000	11185000	34703000	32096000	19880000	18029000	19592000	13827000	70005	semaphorin-7A-like [Carassius auratus]
341	1536	XP_026100989.1	0.79	9	2	2		13070000	26707000	14307000	18048000	21335000	23550000	25437000	21933000	20492000	8833500	20264000	25316000	29967000	7520100	6269300	13070000	26707000	14307000	18048000	21335000	23550000	25437000	21933000	20492000	8833500	20264000	25316000	29967000	7520100	6269300	20658000	20049000	19476000	20658000	20049000	19476000	42168	mitogen-activated protein kinase 1 [Carassius auratus]
342	2500	XP_026144252.1	4.9	54	9	9		263760000	328940000	215280000	504790000	397830000	264190000	251930000	237900000	312880000	208670000	254640000	283670000	316550000	303080000	221990000	172820000	218760000	143290000	355010000	230330000	178890000	163600000	164340000	203260000	146410000	174590000	191300000	214910000	203420000	159520000	342120000	255110000	277380000	224040000	171300000	189780000	27969	14-3-3 protein beta/alpha-A-like [Carassius auratus]
343	1111	XP_026122838.1	0.73	20	5	5		62107000	52799000	42061000	47504000	59673000	58144000	50278000	36740000	63365000	37060000	53413000	61152000	68388000	41986000	37217000	53564000	48037000	35951000	44718000	56007000	53512000	44189000	35144000	56241000	33077000	49745000	52082000	62211000	37771000	33342000	56113000	49496000	54770000	47655000	44433000	47030000	46267	eukaryotic initiation factor 4A-I-like [Carassius auratus]
344	388	XP_026143600.1	2.82	1	2	2		3466700	2801600	2602000	2875300	3102900	3463900	5029100	4305800	2984400	1948000	3749900	3968300	3072400	1479000	260350	3466700	2801600	2602000	2875300	3102900	3463900	5029100	4305800	2984400	1948000	3749900	3968300	3072400	1479000	260350	2969700	3546200	2896500	2969700	3546200	2896500	217365	unconventional myosin-Va-like isoform X6 [Carassius auratus]
346	761	XP_026096173.1	4.16	14	2	2	Acetylation (Protein N-term)	1349600	1994200	3568900	5015500	5188700	2692000	3045600	3910500	6772500	7325200	4832000	4070300	2748000	9480600	6260700	1349600	1994200	3568900	5015500	5188700	2692000	3045600	3910500	6772500	7325200	4832000	4070300	2748000	9480600	6260700	4058000	4899700	5730900	4058000	4899700	5730900	48908	ATP-dependent RNA helicase DDX39A-like [Carassius auratus]
347	289	XP_026070250.1	5.92	17	6	6		40325000	38782000	26878000	38178000	60359000	48457000	44673000	38363000	69478000	39738000	45886000	45375000	70047000	53290000	47872000	39151000	29508000	26789000	34997000	51239000	41670000	34291000	31811000	58900000	39651000	41115000	38947000	43563000	53290000	47792000	44465000	49655000	57202000	36337000	41265000	44942000	75082	calcium-binding mitochondrial carrier protein Aralar1-like [Carassius auratus]
348	399	XP_026087057.1	7.55	2	3	3		4984400	6245900	4209200	11815000	8060400	3935000	4247900	4863100	4787500	3740500	4318800	2422700	5517200	6227500	4160300	4984400	6245900	4209200	11815000	8060400	3935000	4247900	4863100	4787500	3740500	4318800	2422700	5517200	6227500	4160300	7158500	4395600	4759800	7158500	4395600	4759800	214629	unconventional myosin-Va-like isoform X5 [Carassius auratus]
349	1433	XP_026068956.1	3.43	16	3	3	Carbamidomethylation	167720000	81324000	47366000	73024000	83293000	128770000	123020000	38722000	110280000	114000000	136380000	127520000	78370000	122460000	104930000	167720000	81324000	47366000	73024000	83293000	128770000	123020000	38722000	110280000	114000000	136380000	127520000	78370000	122460000	104930000	99016000	102960000	113930000	99016000	102960000	113930000	39674	fructose-bisphosphate aldolase A-like [Carassius auratus]
350	1693	XP_026093670.1	2.3	4	1	1		4979100	4641900	3749300	0	1461300	3419800	2490500	2325200	2321400	2142400	2596300	2473600	2173500	2778900	4101200	4979100	4641900	3749300	0	1461300	3419800	2490500	2325200	2321400	2142400	2596300	2473600	2173500	2778900	4101200	3707900	2539900	2824700	3707900	2539900	2824700	57765	T-complex protein 1 subunit beta [Carassius auratus]
351	1670	XP_026103041.1	1.03	3	2	2	Carbamidomethylation	18157000	13504000	3795900	763950	11765000	14610000	14590000	3050600	16563000	7854800	13517000	20767000	7979400	5478500	6557700	11419000	10874000	0	0	7839500	9462600	14590000	3050600	11702000	7854800	13517000	13768000	7979400	5478500	6557700	13615000	14336000	16459000	10044000	9332000	9460300	85826	von Willebrand factor A domain-containing protein 5A-like isoform X13 [Carassius auratus]
352	1754	XP_026068599.1	1.98	5	2	2	Carbamidomethylation	14101000	11998000	9687700	8282800	13855000	12259000	13493000	6636500	13967000	9618000	13732000	14189000	16600000	10505000	9634200	14101000	11998000	9687700	8282800	13855000	12259000	13493000	6636500	13967000	9618000	13732000	14189000	16600000	10505000	9634200	11585000	11195000	12932000	11585000	11195000	12932000	54762	fascin-like [Carassius auratus]
353	414	XP_026123793.1	2.95	7	12	12	Carbamidomethylation	51380000	63214000	39788000	91245000	45462000	54313000	50597000	38829000	40608000	34026000	23858000	48805000	69149000	54478000	39170000	38366000	44961000	28520000	61625000	23909000	42187000	35183000	27000000	17818000	24818000	13896000	38847000	43440000	42052000	28433000	63174000	52017000	59055000	41749000	34805000	41501000	290856	LOW QUALITY PROTEIN: microtubule-associated protein 1A-like [Carassius auratus]
354	688	XP_026131659.1	6.8	5	1	1	Carbamidomethylation	54494000	30352000	52230000	19798000	28286000	56870000	52210000	55769000	50541000	45936000	59271000	63893000	41190000	43291000	48465000	54494000	30352000	52230000	19798000	28286000	56870000	52210000	55769000	50541000	45936000	59271000	63893000	41190000	43291000	48465000	37971000	52265000	51222000	37971000	52265000	51222000	85149	ATP-dependent 6-phosphofructokinase liver type-like isoform X1 [Carassius auratus]
355	1947	XP_026123866.1	0.7	3	1	1		17428000	6528800	8092100	2725400	6703300	13514000	11393000	1951400	11991000	10926000	11353000	17159000	3755000	9883400	7365300	17428000	6528800	8092100	2725400	6703300	13514000	11393000	1951400	11991000	10926000	11353000	17159000	3755000	9883400	7365300	8295600	9955300	9903000	8295600	9955300	9903000	47328	aspartate aminotransferase mitochondrial-like [Carassius auratus]
356	1535	XP_026056542.1	1.74	11	3	3	Carbamidomethylation; Acetylation (Protein N-term)	52887000	17589000	55378000	116640000	57431000	60318000	70883000	71352000	94998000	54177000	66339000	79115000	100620000	50612000	56916000	52887000	17589000	55378000	116640000	57431000	60318000	70883000	71352000	94998000	54177000	66339000	79115000	100620000	50612000	56916000	70232000	70345000	70721000	70232000	70345000	70721000	65375	glutamate decarboxylase 2-like [Carassius auratus]
357	1532	XP_026106196.1	5.18	14	3	3		148060000	90689000	85939000	124910000	129470000	103080000	91759000	69422000	109680000	81344000	89547000	73557000	121040000	136030000	95243000	148060000	90689000	85939000	124910000	129470000	103080000	91759000	69422000	109680000	81344000	89547000	73557000	121040000	136030000	95243000	115810000	91059000	103080000	115810000	91059000	103080000	39701	fructose-bisphosphate aldolase A-like [Carassius auratus]
358	683	XP_026115929.1	1.5	11	5	5	Carbamidomethylation	23001000	23029000	13499000	15504000	18725000	21872000	18508000	10954000	18068000	13928000	21749000	17003000	27278000	10200000	16338000	20772000	18618000	12223000	6927100	11303000	20029000	16230000	8924500	13664000	12959000	19004000	16289000	24923000	9001500	15476000	19291000	17087000	18994000	13969000	14361000	16939000	69990	heat shock 70 kDa protein 12A-like isoform X2 [Carassius auratus]
359	3161	XP_026099711.1	2.12	20	2	2	Carbamidomethylation	8192400	3773900	0	8500100	12446000	8592700	10680000	10797000	13586000	6170800	8829400	3526100	24443000	6368100	3836900	8192400	3773900	0	8500100	12446000	8592700	10680000	10797000	13586000	6170800	8829400	3526100	24443000	6368100	3836900	10162000	9965200	11245000	10162000	9965200	11245000	20601	ADP-ribosylation factor 3 [Carassius auratus]
360	464	XP_026076784.1	0.96	7	6	6	Carbamidomethylation	17324000	15531000	21431000	14328000	23485000	29497000	28674000	18589000	25182000	10577000	22278000	29420000	28726000	8575900	9189200	16227000	12833000	20692000	11680000	19665000	25641000	21161000	14265000	20562000	10237000	20415000	24623000	16583000	8521200	9189200	20324000	23577000	23780000	17354000	18373000	18196000	103883	puromycin-sensitive aminopeptidase-like [Carassius auratus]
361	549	XP_026085547.1	4.82	44	14	14	Carbamidomethylation	83341000	53381000	63213000	62507000	67143000	67877000	57659000	46626000	56566000	52454000	63550000	59281000	65768000	72822000	55379000	50655000	30281000	33391000	27809000	28905000	40634000	26225000	23111000	25718000	28313000	33937000	33104000	28394000	46293000	33672000	68756000	57276000	65048000	34208000	28800000	35080000	48736	26S proteasome regulatory subunit 7 [Carassius auratus]
362	571	XP_026096177.1	3.04	2	3	3		431310	2809100	1318600	1508200	2273100	3381700	3367400	1542500	2525300	1322300	1259100	2703600	4837900	1864500	1628400	431310	2809100	1318600	1508200	2273100	3381700	3367400	1542500	2525300	1322300	1259100	2703600	4837900	1864500	1628400	2075000	2591300	2886100	2075000	2591300	2886100	227611	myosin-9-like isoform X2 [Carassius auratus]
363	1871	XP_026128880.1	6.98	4	1	1	Carbamidomethylation	0	3544500	539370	2689300	2648600	1520100	4331700	897280	3301400	357370	3032900	3475900	3959900	0	0	0	3544500	539370	2689300	2648600	1520100	4331700	897280	3301400	357370	3032900	3475900	3959900	0	0	2355400	2081600	3489600	2355400	2081600	3489600	35578	serine/threonine-protein phosphatase 2A catalytic subunit beta isoform [Carassius auratus]
364	461	XP_026137293.1	6.14	11	7	7	Carbamidomethylation	48125000	45892000	25135000	51565000	53231000	38400000	43061000	21776000	44668000	29428000	37279000	22818000	43848000	32404000	25595000	37872000	30173000	20842000	41794000	44706000	28018000	28289000	17725000	31703000	26561000	25912000	18164000	30461000	28554000	22733000	46305000	37103000	34363000	35078000	26459000	25165000	79869	adseverin-like [Carassius auratus]
365	545	XP_026118101.1	6.27	3	3	3		14441000	12507000	8260000	5188700	4977200	16384000	21501000	5572700	7884500	5470400	7782600	17537000	25089000	11061000	17100000	14441000	12507000	8260000	5188700	4977200	16384000	21501000	5572700	7884500	5470400	7782600	17537000	25089000	11061000	17100000	9955800	11363000	17903000	9955800	11363000	17903000	182509	complement C3-like [Carassius auratus]
366	1874	XP_026090838.1	1.33	11	3	3	Carbamidomethylation	5686200	8646600	8394800	22533000	17084000	10979000	13365000	19506000	14474000	11956000	12599000	10196000	29607000	6878000	15097000	5686200	8646600	8394800	22533000	17084000	10979000	13365000	19506000	14474000	11956000	12599000	10196000	29607000	6878000	15097000	12469000	14642000	16679000	12469000	14642000	16679000	80647	gelsolin-like [Carassius auratus]
367	1840	XP_026121798.1	5.07	3	1	1		8215300	10835000	0	12479000	13922000	9797000	0	0	0	7120300	8237600	7931900	9206700	11153000	5512000	8215300	10835000	0	12479000	13922000	9797000	0	0	0	7120300	8237600	7931900	9206700	11153000	5512000	11363000	8458700	8408300	11363000	8458700	8408300	40523	guanine nucleotide-binding protein G(i) subunit alpha-2 [Carassius auratus]
368	2413	XP_026079750.1	0.27	17	4	4	Carbamidomethylation	73014000	63586000	47214000	38512000	39790000	69397000	59513000	41614000	60184000	45767000	73838000	120700000	36313000	76328000	68764000	70963000	63586000	47214000	38512000	39790000	69397000	59513000	41614000	60184000	40366000	73838000	120700000	36313000	46525000	32643000	54415000	59867000	97619000	52365000	54466000	64658000	31118	enoyl-CoA hydratase mitochondrial-like [Carassius auratus]
369	1629	XP_026144412.1	3.08	4	1	1		24755000	13467000	10471000	12875000	17927000	21228000	18961000	5057200	20017000	12651000	19777000	21312000	29995000	17573000	11668000	24755000	13467000	10471000	12875000	17927000	21228000	18961000	5057200	20017000	12651000	19777000	21312000	29995000	17573000	11668000	16068000	15583000	20065000	16068000	15583000	20065000	50282	elongation factor 1-alpha-like [Carassius auratus]
370	1213	XP_026096459.1	0.47	6	1	1	Carbamidomethylation	2027900	3435100	1506000	3031000	3717300	3208300	4868700	2115200	3986900	1650500	3137800	4124600	6921900	858000	0	2027900	3435100	1506000	3031000	3717300	3208300	4868700	2115200	3986900	1650500	3137800	4124600	6921900	858000	0	2743500	3165900	4216200	2743500	3165900	4216200	42162	mitogen-activated protein kinase 1-like [Carassius auratus]
371	1268	XP_026073244.1	11.58	20	6	6	Carbamidomethylation	60355000	66921000	45530000	64559000	67276000	53626000	54451000	66666000	52625000	23526000	53489000	37091000	85190000	32074000	35619000	57280000	59339000	44488000	61131000	53682000	49020000	48299000	57250000	41457000	22830000	50063000	33803000	51838000	30626000	29576000	63589000	51716000	55433000	55184000	43771000	39181000	55626	D-3-phosphoglycerate dehydrogenase-like [Carassius auratus]
372	2020	XP_026142321.1	1.27	6	1	1		17175000	9975600	16870000	7304600	8233100	12073000	11869000	15082000	9719800	10705000	12401000	11777000	10102000	9798100	10954000	17175000	9975600	16870000	7304600	8233100	12073000	11869000	15082000	9719800	10705000	12401000	11777000	10102000	9798100	10954000	11912000	11890000	11006000	11912000	11890000	11006000	49158	26S proteasome regulatory subunit 4 [Carassius auratus]
373	682	XP_026113879.1	3.98	8	3	3		29361000	16524000	18616000	22652000	20143000	17502000	22113000	11141000	16761000	20318000	26310000	18158000	16553000	25708000	19728000	29361000	16524000	18616000	22652000	20143000	17502000	22113000	11141000	16761000	20318000	26310000	18158000	16553000	25708000	19728000	22449000	19286000	23400000	22449000	19286000	23400000	57761	intermediate filament protein ON3 [Carassius auratus]
374	980	XP_026124958.1	1.97	23	11	11	Acetylation (Protein N-term); Oxidation (M)	119320000	102990000	43016000	126900000	80996000	84186000	103380000	56073000	82093000	38964000	89599000	71456000	91229000	93085000	61799000	94045000	75506000	33759000	96893000	52878000	63709000	63927000	46485000	66283000	26833000	57195000	57946000	54297000	79634000	51566000	109030000	87256000	94270000	76282000	58051000	60127000	81992	neurofilament medium polypeptide-like [Carassius auratus]
375	742	XP_026144416.1	7.13	27	11	11	Carbamidomethylation; Acetylation (Protein N-term)	158990000	153330000	94588000	198120000	204310000	134510000	126180000	84236000	139820000	95050000	137690000	134950000	140380000	116910000	103000000	85070000	75198000	54128000	107110000	106220000	70821000	63812000	47912000	72651000	51810000	73976000	74751000	67728000	72688000	61709000	166230000	119850000	134410000	85544000	61401000	70170000	49432	adenylyl cyclase-associated protein 1-like [Carassius auratus]
376	352	XP_026064363.1	8.87	4	3	3		8490100	10398000	6822200	11130000	12923000	9401800	9714000	5375200	9351100	5973500	8108900	7671300	8057100	5737800	4788400	8490100	10398000	6822200	11130000	12923000	9401800	9714000	5375200	9351100	5973500	8108900	7671300	8057100	5737800	4788400	9952800	8130500	7085100	9952800	8130500	7085100	119882	ATP-citrate synthase-like isoform X2 [Carassius auratus]
377	987	XP_026062613.1	8.07	20	6	6	Acetylation (Protein N-term)	64428000	63050000	44765000	112650000	116400000	47853000	45388000	48484000	62816000	38143000	55927000	50418000	60526000	67774000	43699000	53536000	50829000	35529000	94944000	97593000	38596000	36625000	39622000	49409000	28843000	44372000	38730000	49880000	52082000	31369000	80259000	48537000	56369000	66486000	38619000	43286000	65548	far upstream element-binding protein 1-like [Carassius auratus]
378	1800	XP_026077628.1	1.05	30	15	15	Carbamidomethylation	368250000	305900000	153500000	370040000	426380000	336320000	320290000	243880000	388050000	260120000	324710000	247380000	467770000	296770000	230510000	203730000	191340000	84905000	232660000	249740000	220600000	220790000	170930000	270000000	146370000	208530000	153390000	327940000	133290000	115980000	333500000	317930000	318770000	197210000	208540000	189910000	64115	heterochromatin protein 1-binding protein 3-like [Carassius auratus]
379	1491	XP_026123451.1	1.92	51	16	16	Carbamidomethylation	92165000	65703000	64080000	62510000	75396000	70102000	73264000	73771000	61566000	52010000	69882000	67550000	77650000	64991000	53258000	49819000	24885000	34294000	16559000	24633000	37766000	35273000	31710000	29465000	31215000	35578000	37564000	27381000	28419000	28781000	74562000	70171000	69908000	30038000	33086000	31545000	47899	26S proteasome regulatory subunit 6A-B [Carassius auratus]
380	785	XP_026146097.1	3.01	27	13	13	Carbamidomethylation	29014000	25426000	21127000	34326000	39494000	36303000	26781000	18866000	33920000	21309000	31580000	34227000	35382000	32108000	21334000	12846000	11887000	11079000	16092000	19749000	16033000	10861000	7944400	14770000	9086000	11773000	14154000	14378000	14961000	7757000	31367000	28277000	31507000	14330000	11739000	12605000	83769	LOW QUALITY PROTEIN: methylmalonyl-CoA mutase mitochondrial-like [Carassius auratus]
381	2215	XP_026113128.1	7.91	4	1	1		16520000	17971000	10850000	34784000	26079000	12782000	10460000	12570000	14003000	10950000	10237000	5242100	15396000	20559000	13091000	16520000	17971000	10850000	34784000	26079000	12782000	10460000	12570000	14003000	10950000	10237000	5242100	15396000	20559000	13091000	21241000	12153000	12905000	21241000	12153000	12905000	34083	40S ribosomal protein SA-like [Carassius auratus]
382	2469	XP_026085669.1	6.66	26	4	4	Acetylation (Protein N-term)	47573000	46212000	35873000	107130000	91185000	38045000	44766000	40908000	47780000	29376000	38350000	18697000	41564000	48515000	30706000	42330000	40805000	35692000	96537000	83219000	38045000	40476000	36897000	43359000	29342000	34809000	18697000	37150000	48348000	30706000	65595000	40812000	36649000	59717000	37624000	33942000	22634	synaptosomal-associated protein 25-B-like isoform X1 [Carassius auratus]
383	3709	XP_026063907.1	1.14	15	1	1	Carbamidomethylation	2380800	2613600	786770	8140900	15685000	4258700	5364000	6115400	9584500	1945400	3484500	3091500	23295000	5365000	5177400	2380800	2613600	786770	8140900	15685000	4258700	5364000	6115400	9584500	1945400	3484500	3091500	23295000	5365000	5177400	5921500	5453600	8082700	5921500	5453600	8082700	20600	ADP-ribosylation factor 1-like [Carassius auratus]
384	2331	XP_026112693.1	2.97	21	6	6	Carbamidomethylation	26144000	22790000	21974000	22776000	34737000	27819000	28777000	23532000	34209000	21351000	25908000	23330000	34995000	34636000	31240000	16591000	16415000	11867000	11065000	24173000	18919000	21773000	16405000	23893000	14277000	17752000	17136000	27422000	17882000	15670000	26064000	27678000	31740000	16022000	19053000	20122000	44528	pyruvate dehydrogenase E1 component subunit alpha mitochondrial-like isoform X1 [Carassius auratus]
385	2795	XP_026126180.1	4.59	8	2	2		31251000	18795000	19009000	41579000	29870000	23851000	17561000	15537000	22920000	23702000	19176000	7127200	13537000	39695000	27743000	31251000	18795000	19009000	41579000	29870000	23851000	17561000	15537000	22920000	23702000	19176000	7127200	13537000	39695000	27743000	28780000	21394000	22371000	28780000	21394000	22371000	28222	ATP synthase F(0) complex subunit B1 mitochondrial-like [Carassius auratus]
386	2252	XP_026053642.1	1.9	19	6	6	Carbamidomethylation	97249000	72602000	78558000	67980000	95520000	98203000	73980000	82934000	104350000	92871000	88226000	79533000	81998000	89546000	95837000	78835000	65396000	72548000	58123000	78471000	83126000	61868000	73471000	86865000	78519000	73949000	68286000	68601000	73296000	85700000	83916000	91146000	87885000	71190000	76967000	74326000	64055	nucleolin-like isoform X5 [Carassius auratus]
387	1948	XP_026136292.1	9.83	5	1	1		12206000	13267000	8810100	25755000	18517000	8030200	8389100	9887500	10827000	7374600	9825900	4829800	10159000	11967000	7451800	12206000	13267000	8810100	25755000	18517000	8030200	8389100	9887500	10827000	7374600	9825900	4829800	10159000	11967000	7451800	15711000	8901700	8846700	15711000	8901700	8846700	49604	septin-6 isoform X6 [Carassius auratus]
388	2802	XP_026096425.1	6.03	29	5	5		76080000	55917000	71125000	55609000	47160000	67483000	77345000	93223000	69983000	75161000	82044000	68404000	78184000	59926000	82975000	65806000	46285000	62892000	50091000	40293000	59523000	66836000	78077000	60834000	56011000	65946000	55665000	72071000	39610000	56827000	61178000	78138000	74306000	53073000	64256000	58024000	21427	adenylate kinase isoenzyme 1 [Carassius auratus]
389	2141	XP_026076959.1	1.27	10	1	1		18397000	10431000	1754100	6547000	11382000	13364000	12505000	336860	14851000	2795900	16743000	20187000	7205900	17584000	1785700	18397000	10431000	1754100	6547000	11382000	13364000	12505000	336860	14851000	2795900	16743000	20187000	7205900	17584000	1785700	9702200	8770400	12701000	9702200	8770400	12701000	24953	ras-related protein Rab-3A [Carassius auratus]
390	2547	XP_026141783.1	1.69	35	5	5	Carbamidomethylation; Oxidation (M)	75919000	143500000	103380000	156100000	118650000	108280000	105480000	131080000	127580000	68375000	101350000	146500000	139970000	50952000	65742000	68609000	126090000	95338000	140500000	103540000	96959000	90235000	115840000	119580000	64755000	88249000	129110000	117020000	50096000	65300000	119510000	110460000	105840000	106820000	98808000	91399000	27857	14-3-3 protein zeta-like [Carassius auratus]
391	1765	XP_026123934.1	0.82	16	4	4	Carbamidomethylation	29388000	21811000	25097000	30182000	24096000	23418000	24111000	31820000	31716000	24232000	30216000	32183000	31577000	27761000	26624000	29388000	21737000	25004000	30115000	24040000	23418000	24111000	28978000	26325000	24232000	27027000	29410000	25891000	24015000	25006000	26129000	31154000	29672000	26057000	27039000	26270000	54210	calcium/calmodulin-dependent protein kinase type II delta 1 chain-like isoform X8 [Carassius auratus]
392	2794	XP_026074350.1	0.2	53	8	8	Carbamidomethylation	93187000	80828000	61372000	78888000	86527000	88040000	100420000	117860000	60580000	48625000	87961000	87287000	196020000	54532000	53863000	79062000	67939000	55172000	68455000	60413000	75209000	75586000	92682000	44138000	39672000	69075000	66608000	132990000	44578000	43442000	83845000	94144000	108880000	66759000	70652000	75925000	33841	pyridoxal kinase-like [Carassius auratus]
393	2202	XP_026066038.1	3.35	39	10	10	Carbamidomethylation	96056000	88962000	59005000	110450000	117170000	88476000	80825000	51103000	94578000	66385000	78432000	86539000	104220000	70640000	69279000	68176000	53319000	37873000	71330000	77201000	57819000	47196000	34145000	64132000	45565000	51104000	58395000	47158000	44406000	48405000	105360000	88229000	102100000	67550000	51994000	53507000	44694	actin-related protein 2-A [Carassius auratus]
394	865	XP_026141684.1	14.4	8	4	4		19061000	17467000	16424000	18604000	21347000	13837000	9205100	7567700	10248000	15347000	15511000	12498000	11733000	24582000	21020000	19061000	16936000	15962000	17089000	20662000	13392000	8895800	6909300	9783600	15240000	15241000	11833000	10892000	24582000	21020000	19718000	15940000	18574000	18920000	15543000	17983000	81317	trifunctional enzyme subunit alpha mitochondrial-like isoform X2 [Carassius auratus]
395	904	XP_026134647.1	0.98	16	5	5	Carbamidomethylation	96405000	52202000	42391000	95622000	84807000	73448000	68704000	37333000	77203000	61229000	68593000	71794000	58196000	83520000	52452000	85315000	47593000	36858000	79338000	79342000	66365000	61810000	31508000	73495000	54119000	60190000	71794000	58196000	76183000	48328000	77389000	64437000	71578000	65689000	57460000	62938000	35419	sideroflexin-1-like [Carassius auratus]
396	1832	XP_026136473.1	2.91	5	1	1	Carbamidomethylation	350080	1849900	104410	889730	4008600	308170	976720	413280	2294900	732900	1508200	422020	2821300	2186100	971260	350080	1849900	104410	889730	4008600	308170	976720	413280	2294900	732900	1508200	422020	2821300	2186100	971260	2343900	1329600	1977200	2343900	1329600	1977200	35725	serine/threonine-protein phosphatase 2A catalytic subunit alpha isoform-like [Carassius auratus]
397	2244	XP_026070143.1	9.21	4	1	1		7727100	7982900	4880300	13783000	12360000	5129100	4860500	5227300	6937300	4383900	4920200	2069700	6639900	9457500	5660900	7727100	7982900	4880300	13783000	12360000	5129100	4860500	5227300	6937300	4383900	4920200	2069700	6639900	9457500	5660900	9346500	5307600	5749600	9346500	5307600	5749600	33906	40S ribosomal protein SA [Carassius auratus]
398	588	XP_026145801.1	0.89	2	5	5		8463800	8999000	4250000	13138000	10099000	6286800	10795000	7638900	8756900	7283600	7977300	5623100	9930200	7807500	8071400	6541600	7716300	2503200	8197200	8236900	6286800	8844800	7128400	7790500	4998700	7977300	4833400	8810100	5131700	5635400	10159000	9284400	9253200	7586300	7363500	7250800	523591	plectin-like isoform X20 [Carassius auratus]
399	2645	XP_026105226.1	3.97	56	12	12	Carbamidomethylation	199100000	176860000	116180000	211920000	241430000	185210000	175850000	113910000	187830000	115190000	171720000	183060000	183730000	165700000	125190000	101420000	86234000	61470000	105500000	121060000	92346000	86970000	52994000	90439000	54716000	89414000	93958000	83993000	75057000	50462000	189780000	158230000	169190000	95137000	75493000	78577000	26861	40S ribosomal protein S3 [Carassius auratus]
400	1443	XP_026080095.1	3.23	22	4	4		111610000	146090000	75887000	267410000	209740000	102760000	101010000	103060000	134210000	126150000	106570000	63435000	118900000	191800000	139150000	111610000	146090000	75887000	267410000	209740000	102760000	101010000	95708000	134210000	108790000	106570000	63435000	118900000	191800000	121480000	162150000	120850000	138100000	162150000	108490000	120440000	30303	voltage-dependent anion-selective channel protein 2 [Carassius auratus]
401	3265	XP_026113129.1	0.86	32	4	4		1033500000	1183600000	456820000	1164000000	1454300000	1018400000	1198700000	639000000	1069200000	513390000	1122500000	916420000	1731200000	837560000	568130000	965900000	1167700000	423380000	1122600000	1392700000	967660000	1173700000	637980000	1032100000	463410000	1084300000	888830000	1713400000	787170000	542610000	1058400000	895780000	1035200000	1014400000	854970000	1003300000	14976	fatty acid-binding protein brain-like [Carassius auratus]
402	3493	XP_026056731.1	1.24	79	10	10	Carbamidomethylation; Acetylation (Protein N-term); Oxidation (M)	273350000	167780000	130740000	199080000	240030000	184060000	203590000	129320000	203020000	221700000	199010000	208870000	233700000	265400000	194930000	165500000	83875000	72240000	93596000	116670000	107360000	104840000	48715000	91996000	134550000	111530000	121210000	72707000	152720000	104390000	206810000	189280000	226070000	106600000	97663000	112940000	17856	peptidyl-prolyl cis-trans isomerase NIMA-interacting 1 [Carassius auratus]
403	556	XP_026053359.1	0.81	21	9	9		40590000	34700000	15588000	48415000	54028000	30240000	28117000	20695000	30298000	22595000	27459000	24486000	39996000	36941000	24168000	19578000	23296000	5755400	29977000	29055000	19033000	18568000	12534000	18697000	10473000	17564000	16516000	27309000	11219000	8208800	42188000	27812000	34137000	23411000	15861000	16164000	70182	heterogeneous nuclear ribonucleoprotein M-like isoform X2 [Carassius auratus]
404	2199	XP_026051483.1	3.12	9	2	2		24636000	2731000	18782000	18186000	17795000	19074000	15174000	4340500	19716000	22975000	20241000	10957000	18472000	35382000	26554000	24636000	2731000	18782000	18186000	17795000	19074000	15174000	4340500	19716000	22975000	20241000	10957000	18472000	35382000	26554000	17556000	16256000	26542000	17556000	16256000	26542000	62465	drebrin-like isoform X8 [Carassius auratus]
405	1103	XP_026119161.1	2.15	15	4	4		43962000	15269000	34888000	59424000	15453000	43614000	27098000	31693000	34671000	20110000	36465000	21453000	34210000	14393000	24712000	42895000	12897000	34888000	59424000	14472000	42785000	25303000	30062000	34671000	19594000	36344000	20487000	27998000	14393000	24712000	45005000	35265000	35827000	43531000	34073000	33394000	58588	protein disulfide-isomerase-like isoform X1 [Carassius auratus]
406	1635	XP_026066934.1	2.17	10	2	2	Carbamidomethylation	11397000	9765500	7896800	5734300	8643100	11135000	10183000	9896500	9512600	7212800	10978000	8918700	11724000	5131600	6098900	11397000	9765500	7896800	5734300	8643100	11135000	10183000	9896500	9512600	7212800	10978000	8918700	11724000	5131600	6098900	8687300	9587900	8919100	8687300	9587900	8919100	37392	guanine nucleotide-binding protein G(I)/G(S)/G(T) subunit beta-2 [Carassius auratus]
407	1048	XP_026053146.1	1.28	6	2	2	Carbamidomethylation	6699500	14553000	7595200	8204500	12940000	12303000	10809000	10218000	12002000	8470600	10490000	9300100	18016000	7679600	5851700	6699500	14553000	7595200	8204500	12940000	12303000	10809000	10218000	12002000	8470600	10490000	9300100	18016000	7679600	5851700	9998400	10760000	10267000	9998400	10760000	10267000	66051	glutaminase kidney isoform mitochondrial-like isoform X2 [Carassius auratus]
408	1235	XP_026063827.1	2.49	21	5	5	Acetylation (Protein N-term)	80349000	48641000	32768000	45510000	58899000	59451000	64976000	34982000	65687000	45327000	64712000	66902000	82462000	70158000	49140000	75181000	46170000	31116000	37921000	49233000	52655000	60711000	32162000	62595000	44489000	54004000	55441000	63018000	62998000	41066000	55321000	56244000	66675000	47924000	50523000	55306000	38134	malate dehydrogenase cytoplasmic-like isoform X1 [Carassius auratus]
409	976	XP_026094861.1	13.08	8	3	3		19251000	19957000	15226000	41495000	30708000	13999000	13019000	14912000	6751300	11217000	12438000	10395000	17744000	21562000	13665000	19251000	19957000	15226000	41495000	30708000	13999000	13019000	14912000	6751300	11217000	12438000	10395000	17744000	21562000	13665000	25327000	11980000	15161000	25327000	11980000	15161000	54794	protein disulfide-isomerase A3-like [Carassius auratus]
410	988	XP_026106680.1	2.12	10	3	3	Acetylation (Protein N-term)	27404000	23411000	20236000	31735000	37960000	28838000	25179000	19486000	32721000	21577000	25827000	22953000	32512000	23105000	13453000	27404000	23411000	20236000	31735000	37960000	28838000	25179000	19486000	32721000	21577000	25827000	22953000	32512000	23105000	13453000	28149000	25622000	23647000	28149000	25622000	23647000	63221	protein RUFY3-like isoform X4 [Carassius auratus]
411	1283	XP_026145409.1	18.44	8	3	3	Carbamidomethylation	2742500	567660	500500	23969000	8042400	5997800	4199400	5112600	2206400	725180	8090600	15798000	21936000	23327000	45251000	2742500	567660	500500	23969000	8042400	4858000	4199400	5112600	2206400	725180	8090600	12850000	19974000	13511000	22042000	11923000	6078900	24777000	11923000	4939200	15294000	72250	succinate dehydrogenase [ubiquinone] flavoprotein subunit mitochondrial-like [Carassius auratus]
412	1938	XP_026068774.1	1.61	9	2	2		11308000	4165000	6952500	5781900	7863800	8810200	4792800	3230300	6498500	9902500	6262400	10045000	3503000	16741000	11216000	11308000	4165000	6952500	5781900	7863800	8810200	4792800	3230300	6498500	9902500	6262400	10045000	3503000	16741000	11216000	7214300	6646900	9553400	7214300	6646900	9553400	40525	guanine nucleotide-binding protein G(i) subunit alpha-2 [Carassius auratus]
413	2292	XP_026097255.1	2.4	16	5	5	Carbamidomethylation; Acetylation (Protein N-term)	29137000	17595000	23846000	25253000	33628000	24610000	24782000	27153000	26237000	27466000	24593000	25847000	37321000	29556000	29942000	24396000	17595000	20794000	23687000	26588000	21094000	21308000	22919000	22128000	19467000	21954000	23545000	30140000	19942000	21299000	29813000	26468000	30971000	22612000	21383000	23376000	50369	protein kinase C and casein kinase substrate in neurons protein 1-like [Carassius auratus]
414	765	XP_026140375.1	7.95	39	12	12	Carbamidomethylation	96606000	86989000	51161000	88532000	107400000	92227000	65239000	48703000	53998000	51775000	78174000	40338000	60459000	81038000	53089000	38350000	36440000	20635000	46325000	49860000	35401000	25230000	19114000	22211000	25189000	27653000	15338000	25059000	35688000	22852000	90577000	66889000	65247000	38322000	25429000	25318000	47248	flotillin-1-like [Carassius auratus]
415	1624	XP_026105619.1	2.79	7	1	1	Carbamidomethylation	712390	1244600	702960	2021200	2065400	762870	1117800	810000	1312800	0	1509300	1942500	1731700	640580	0	712390	1244600	702960	2021200	2065400	762870	1117800	810000	1312800	0	1509300	1942500	1731700	640580	0	1349300	1000900	1456000	1349300	1000900	1456000	37317	guanine nucleotide-binding protein G(I)/G(S)/G(T) subunit beta-2-like [Carassius auratus]
416	533	XP_026130739.1	1.56	9	5	5		11206000	11960000	5845600	12182000	12301000	21101000	12180000	12267000	14295000	9769300	11767000	22321000	16859000	7258000	4272100	9136700	10410000	4963400	8086900	10185000	16496000	10828000	9478300	12164000	5001600	10914000	13737000	12791000	4303300	3459300	11612000	15227000	15431000	8556400	10794000	9040800	98176	puromycin-sensitive aminopeptidase [Carassius auratus]
417	374	XP_026141727.1	5.63	17	15	15	Carbamidomethylation; Acetylation (Protein N-term); Oxidation (M)	70399000	50703000	38496000	59491000	56171000	57742000	60268000	54931000	53282000	42903000	66288000	59702000	56894000	46412000	38402000	28329000	17566000	13486000	15737000	16501000	23661000	29768000	24998000	23697000	16558000	30240000	30524000	21765000	17861000	17025000	62410000	58483000	59634000	21061000	25815000	25002000	186368	bifunctional glutamate/proline--tRNA ligase [Carassius auratus]
418	5122	XP_026066894.1	8.23	27	5	5	Carbamidomethylation; Oxidation (M)	9442400000	12036000000	7635400000	20297000000	17707000000	8096600000	7906100000	8192200000	9389400000	7594600000	7503000000	7915700000	9284000000	14105000000	9081500000	9365500000	11919000000	7560400000	20255000000	17662000000	8066900000	7848200000	8152100000	9354400000	7400600000	7462400000	7882100000	9218400000	13378000000	8621300000	13427000000	8239500000	9589400000	13352000000	8164400000	9312500000	25888	ependymin-1 [Carassius auratus]
419	1183	XP_026126992.1	5.69	17	6	6	Carbamidomethylation	56242000	63167000	46014000	65853000	86836000	53246000	52377000	43674000	63037000	50353000	59061000	40383000	69227000	69153000	41430000	54595000	49643000	36954000	62146000	64139000	43648000	42115000	32074000	50975000	43156000	47377000	37485000	52512000	63256000	39554000	68510000	52714000	58133000	53495000	42394000	48037000	55266	D-3-phosphoglycerate dehydrogenase-like [Carassius auratus]
420	1136	XP_026145602.1	5.36	45	13	13	Carbamidomethylation	75024000	54526000	16983000	57808000	78195000	97369000	82027000	54641000	82498000	72932000	92238000	87168000	90061000	74327000	70599000	54990000	29661000	6445900	19637000	37304000	57100000	43141000	32185000	42174000	50020000	52619000	54814000	32105000	50764000	48707000	64122000	79178000	85391000	34639000	44924000	47802000	54022	NADH dehydrogenase [ubiquinone] flavoprotein 1 mitochondrial-like [Carassius auratus]
421	2286	XP_026062353.1	3.26	6	2	2	Acetylation (Protein N-term)	21849000	15089000	10720000	12243000	17094000	17263000	17402000	7839000	16243000	15373000	16945000	18505000	15259000	20698000	14663000	21849000	15089000	10720000	12243000	17094000	17263000	17402000	7839000	16243000	15373000	16945000	18505000	15259000	20698000	14663000	15399000	14824000	17214000	15399000	14824000	17214000	50310	phosphatidylinositol 5-phosphate 4-kinase type-2 alpha-like [Carassius auratus]
422	1435	XP_026113942.1	0.24	9	3	3		18609000	19079000	9408400	16125000	19831000	18026000	19213000	9007300	21020000	11837000	15585000	14802000	28500000	10987000	10764000	18609000	19079000	9408400	16125000	19831000	18026000	19213000	9007300	21020000	11837000	15585000	14802000	28500000	10987000	10764000	17263000	15821000	18079000	17263000	15821000	18079000	49962	succinate--CoA ligase [ADP-forming] subunit beta mitochondrial-like [Carassius auratus]
423	638	XP_026080605.1	7.04	1	2	2		477450	4821100	1452700	6505200	1076600	5375400	2663200	2470600	821720	1085400	4866400	5505800	6076900	1873900	3702700	477450	4821100	1452700	6505200	1076600	5375400	2663200	2470600	821720	1085400	4866400	5505800	6076900	1873900	3702700	4608300	3732400	4952700	4608300	3732400	4952700	521756	plectin-like isoform X21 [Carassius auratus]
424	1933	XP_026140902.1	4.81	10	3	3	Acetylation (Protein N-term)	20294000	15672000	9911300	15119000	21431000	13491000	11742000	8366600	15589000	12621000	13267000	10683000	16904000	15960000	7209400	20294000	15672000	9911300	15119000	21431000	13491000	11742000	8366600	15589000	12621000	13267000	10683000	16904000	15960000	7209400	16486000	12362000	12805000	16486000	12362000	12805000	46451	phosphatidylinositol 5-phosphate 4-kinase type-2 alpha-like isoform X2 [Carassius auratus]
425	1027	XP_026095875.1	1.09	3	2	2		31965000	17198000	16122000	10805000	23618000	25737000	21618000	9149500	25258000	23952000	21806000	17089000	20507000	9666000	17543000	31965000	17198000	16122000	10805000	23618000	25737000	21618000	9149500	25258000	23952000	21806000	17089000	20507000	9666000	17543000	19942000	21143000	18542000	19942000	21143000	18542000	95484	dynamin-2 isoform X7 [Carassius auratus]
427	2417	XP_026068100.1	9.33	14	2	2		21166000	21636000	18764000	34924000	35348000	18062000	16760000	15144000	23033000	16010000	19499000	18670000	20398000	34484000	17670000	18587000	20852000	16292000	31999000	31170000	15358000	14960000	15144000	20511000	16010000	17472000	16982000	18740000	32745000	17670000	26368000	18739000	22500000	23780000	16396000	20722000	23932	ras-related protein Rab-14-like [Carassius auratus]
428	1451	XP_026075999.1	5.05	51	12	12	Carbamidomethylation; Acetylation (Protein N-term)	136760000	162380000	111090000	87604000	154690000	163870000	166620000	157470000	142490000	109770000	143800000	167380000	206910000	94089000	126340000	78671000	95071000	74943000	44658000	76951000	107410000	103540000	89958000	88650000	74058000	87897000	104170000	109130000	58478000	94214000	139870000	150420000	157240000	74261000	92724000	90777000	42406	beta-centractin [Carassius auratus]
429	1761	XP_026129192.1	6.6	48	15	15	Carbamidomethylation; Acetylation (Protein N-term)	158820000	88977000	87036000	138430000	111740000	133840000	123400000	83562000	107200000	97574000	133940000	96490000	132000000	126710000	133610000	81696000	28145000	38708000	83718000	45229000	70386000	59325000	37901000	52439000	44837000	66500000	55704000	69956000	59842000	71269000	125840000	113430000	135100000	61451000	53523000	64654000	37510	annexin A3-like [Carassius auratus]
430	3165	XP_026136845.1	0.43	35	5	5	Carbamidomethylation; Acetylation (Protein N-term); Oxidation (M)	717390000	504160000	440440000	617670000	724690000	597020000	542480000	365320000	646540000	549740000	509130000	453930000	703980000	614890000	425800000	607650000	387270000	316280000	485090000	654340000	507540000	469210000	272890000	561870000	445780000	430160000	378730000	636850000	509490000	303600000	603210000	546700000	559200000	490120000	451460000	451770000	18635	cofilin-2-like [Carassius auratus]
431	2998	XP_026098318.1	9.71	20	7	7	Carbamidomethylation	42512000	34316000	42825000	47103000	23573000	43386000	42880000	42488000	32373000	26802000	49764000	44308000	55431000	35549000	51223000	32844000	20687000	36762000	38550000	13910000	30492000	31599000	31787000	24277000	23440000	34986000	32582000	38588000	29800000	46413000	38478000	38975000	51338000	28551000	28319000	36474000	61498	delta-1-pyrroline-5-carboxylate dehydrogenase mitochondrial [Carassius auratus]
432	1927	XP_026108617.1	1.11	2	1	1		1973400	1487600	884860	1854200	2456100	2707800	2125100	1543900	0	1245400	2381000	3440400	3537000	790960	0	1973400	1487600	884860	1854200	2456100	2707800	2125100	1543900	0	1245400	2381000	3440400	3537000	790960	0	1731200	1905500	2537300	1731200	1905500	2537300	71308	alpha-adducin-like isoform X6 [Carassius auratus]
433	2920	XP_026058961.1	1.62	13	5	5	Oxidation (M)	276350000	269800000	153450000	535160000	406810000	225640000	222580000	194880000	266120000	252510000	228190000	112930000	230760000	437330000	252180000	197300000	246870000	102840000	498130000	366250000	176360000	202530000	174510000	240740000	179560000	192350000	83282000	220810000	309830000	180970000	349180000	232350000	252710000	302370000	194740000	197450000	56845	excitatory amino acid transporter 2-like isoform X1 [Carassius auratus]
434	967	XP_026060127.1	2.4	8	3	3		17599000	11778000	7757300	12687000	14495000	13111000	10182000	6426700	13863000	9789100	13464000	13254000	11505000	12839000	9952600	17599000	11778000	7757300	12687000	14495000	13111000	10182000	6426700	13863000	9789100	13464000	13254000	11505000	12839000	9952600	12941000	10743000	12273000	12941000	10743000	12273000	77947	propionyl-CoA carboxylase alpha chain mitochondrial [Carassius auratus]
435	1198	XP_026134045.1	4.17	18	9	9	Carbamidomethylation	31230000	57966000	21128000	46147000	75586000	34483000	45576000	35452000	54170000	23176000	41080000	34366000	73098000	30397000	20821000	26273000	32146000	18130000	27160000	46864000	26182000	26269000	22071000	29540000	14866000	23257000	15142000	38361000	18939000	11762000	52296000	41671000	44442000	30115000	23786000	21492000	87692	reticulon-1-like isoform X2 [Carassius auratus]
436	1824	XP_026077366.1	0.1	21	4	4	Carbamidomethylation	12874000	6231700	8358600	7601800	14792000	9348000	8975900	5663400	11735000	14301000	8597200	11054000	8236600	18748000	9230300	12387000	6231700	7774700	7601800	14792000	9348000	8975900	5648200	11735000	12717000	8597200	11020000	8236600	15301000	6990800	10745000	10485000	13093000	10210000	9684800	11186000	40697	guanine nucleotide-binding protein G(i) subunit alpha-2-like [Carassius auratus]
437	3216	XP_026141813.1	7.1	49	10	10	Carbamidomethylation	137220000	57222000	47503000	53040000	97606000	110920000	53124000	22600000	71238000	67951000	58465000	40474000	54188000	69465000	54669000	75693000	36315000	25612000	30998000	39908000	62066000	26771000	14098000	34976000	31657000	36311000	19610000	30512000	20541000	17203000	84783000	73128000	66444000	41705000	33914000	24835000	24148	40S ribosomal protein S8 [Carassius auratus]
438	1804	XP_026063899.1	0.96	8	2	2	Carbamidomethylation	10980000	13798000	10603000	7822300	10372000	12021000	14643000	10534000	12294000	8417300	13912000	14545000	13872000	5668600	6663900	10980000	13798000	10603000	7822300	10372000	12021000	14643000	10534000	12294000	8417300	13912000	14545000	13872000	5668600	6663900	10715000	12160000	10932000	10715000	12160000	10932000	44161	mitogen-activated protein kinase 1-like [Carassius auratus]
439	2042	XP_026122144.1	0.77	75	12	12	Carbamidomethylation	149520000	94242000	90209000	71151000	100320000	93401000	112950000	64567000	105550000	102320000	108450000	112580000	111840000	109290000	107010000	91886000	40785000	55586000	32203000	46233000	53407000	55671000	27073000	56244000	67594000	60851000	69936000	25921000	74464000	78682000	102090000	97598000	114690000	53338000	51998000	61971000	30664	S-methyl-5'-thioadenosine phosphorylase-like [Carassius auratus]
440	2236	XP_026070743.1	6.59	18	3	3	Carbamidomethylation	16918000	13436000	14202000	10253000	14800000	15433000	17878000	14092000	18968000	14327000	15769000	17277000	23170000	15071000	15659000	16918000	13436000	14202000	10253000	14800000	15433000	17878000	14092000	18968000	14327000	15769000	17277000	23170000	15071000	15659000	13922000	16140000	17389000	13922000	16140000	17389000	37957	methylthioribose-1-phosphate isomerase [Carassius auratus]
441	2167	XP_026059220.1	4.48	23	2	2		12429000	17374000	25703000	7359000	17797000	16813000	17931000	25633000	28215000	21568000	23160000	24559000	15597000	13959000	29291000	12429000	17374000	25703000	7359000	17797000	16813000	17931000	25633000	28215000	21568000	23160000	24559000	15597000	13959000	29291000	18313000	22849000	23773000	18313000	22849000	23773000	29747	prohibitin-like [Carassius auratus]
442	2858	XP_026138827.1	1.36	22	3	3	Carbamidomethylation	15917000	13612000	12576000	6402400	12721000	15218000	15539000	11880000	12352000	10445000	14942000	14921000	17646000	9413400	13244000	15917000	13612000	12576000	6402400	12721000	15218000	15539000	11880000	12352000	10445000	14942000	14921000	17646000	9413400	13244000	12717000	13087000	14426000	12717000	13087000	14426000	33155	protein NipSnap homolog 2 [Carassius auratus]
443	543	XP_026097000.1	10.74	16	10	10	Carbamidomethylation; Acetylation (Protein N-term)	33954000	20680000	17727000	52725000	34063000	34770000	31450000	19968000	22448000	20581000	33885000	27023000	44443000	30650000	29271000	17262000	9097300	7513200	35330000	21071000	19017000	15396000	6518700	8653100	10342000	18479000	14931000	25227000	23906000	20469000	36397000	28522000	33180000	22383000	14486000	20602000	97332	importin subunit beta-1-like [Carassius auratus]
445	2088	XP_026067886.1	4.4	17	7	7	Carbamidomethylation	123510000	92607000	70045000	110970000	156860000	93170000	95056000	71582000	120760000	90782000	108510000	103710000	109400000	118580000	99803000	95218000	62905000	61783000	83815000	116380000	68610000	65246000	56255000	90574000	76310000	80008000	77239000	67593000	106010000	91207000	114450000	94953000	111220000	84019000	71399000	84412000	75482	nucleolin-like isoform X2 [Carassius auratus]
446	1046	XP_026085230.1	0.43	10	4	4		14711000	16561000	15029000	27915000	14298000	15971000	19228000	23663000	20144000	13908000	17950000	17523000	27637000	14677000	12262000	14711000	16561000	15029000	22326000	12086000	15867000	15158000	18049000	16369000	11042000	17950000	17523000	22605000	12130000	12262000	20043000	18583000	20283000	16143000	15297000	16494000	82948	trifunctional enzyme subunit alpha mitochondrial-like [Carassius auratus]
447	568	XP_026112197.1	0.54	12	4	4		12120000	28660000	2935100	12561000	27091000	19630000	31643000	27380000	30300000	3381100	19817000	22271000	50036000	8068400	1918200	10868000	26662000	2480700	11714000	24553000	17391000	28518000	26557000	27294000	2638600	17630000	19156000	47424000	7545500	1918200	16673000	24984000	27166000	15256000	22996000	25057000	75206	calcium-binding mitochondrial carrier protein Aralar1-like [Carassius auratus]
448	1272	XP_026084102.1	1.24	22	6	6		49366000	37956000	38525000	42032000	43927000	38809000	35100000	37720000	37630000	39709000	37382000	34004000	43061000	48553000	40612000	36119000	23739000	28218000	14966000	24709000	28718000	25204000	27428000	25817000	30988000	26615000	26054000	30534000	27733000	27547000	42361000	37794000	42096000	25550000	27631000	27697000	52885	succinate-semialdehyde dehydrogenase mitochondrial-like isoform X2 [Carassius auratus]
449	733	XP_026106606.1	1.14	14	4	4	Carbamidomethylation	36399000	23863000	17091000	17588000	21971000	28344000	22746000	8316900	15293000	24110000	27153000	26027000	15104000	29020000	20133000	32778000	23682000	13840000	17588000	21971000	28344000	22746000	8316900	15293000	19218000	26876000	25970000	15050000	18141000	14296000	24323000	24276000	23487000	21972000	19384000	20066000	47439	flotillin-2a-like [Carassius auratus]
450	3927	XP_026115309.1	0.18	5	1	1		1090000	353070	0	0	404400	999500	634760	382370	0	0	0	0	295710	1106000	0	1090000	353070	0	0	404400	999500	634760	382370	0	0	0	0	295710	1106000	0	615830	672210	700860	615830	672210	700860	28263	ATP synthase F(0) complex subunit B1 mitochondrial-like [Carassius auratus]
451	3625	XP_026065054.1	2.7	6	1	1		9904200	11676000	4261700	12126000	14594000	8287000	7082300	5242800	10713000	5807600	8258000	6780400	9425600	8469800	5861700	9904200	11676000	4261700	12126000	14594000	8287000	7082300	5242800	10713000	5807600	8258000	6780400	9425600	8469800	5861700	10513000	7426600	7759100	10513000	7426600	7759100	17296	ubiquitin-conjugating enzyme E2 N-like [Carassius auratus]
452	2360	XP_026058577.1	1.16	10	3	3		23947000	17666000	7447100	8409900	13420000	22496000	23399000	6513000	21390000	10775000	21966000	21850000	18092000	13901000	9521900	22529000	17288000	7447100	8232100	12903000	21471000	22245000	6513000	20377000	10670000	20260000	20662000	17648000	13329000	8713400	14302000	17665000	18352000	13680000	16840000	17408000	35138	electron transfer flavoprotein subunit alpha mitochondrial-like [Carassius auratus]
453	1753	XP_026070025.1	4.61	5	1	1		7770200	7614300	4936400	6891200	7537300	7795800	8661300	6386500	10168000	6725200	8353300	10213000	13264000	7197300	6204500	7770200	7614300	4936400	6891200	7537300	7795800	8661300	6386500	10168000	6725200	8353300	10213000	13264000	7197300	6204500	6949900	7947300	9046500	6949900	7947300	9046500	50032	succinate--CoA ligase [ADP-forming] subunit beta mitochondrial [Carassius auratus]
454	546	XP_026073419.1	2.62	9	10	10		40972000	42904000	33609000	59623000	48239000	24947000	37766000	28850000	47336000	28184000	33645000	35950000	48808000	46334000	35539000	8989700	27314000	12679000	31545000	30512000	14650000	22343000	14079000	26209000	3218100	16745000	18980000	30976000	7393300	4272100	54954000	40512000	49146000	24015000	18678000	15673000	187096	microtubule-associated protein 2-like isoform X2 [Carassius auratus]
455	747	XP_026055230.1	2.78	5	2	2	Carbamidomethylation	3114000	4644400	716160	4983200	9487700	2458800	5140800	2799000	3683100	413080	3666600	1941700	6337600	481950	261700	3114000	4644400	716160	4983200	9487700	2458800	5140800	2799000	3683100	413080	3666600	1941700	6337600	481950	261700	4589100	3284500	3404600	4589100	3284500	3404600	58063	intermediate filament protein ON3-like [Carassius auratus]
456	1563	XP_026095198.1	1.5	11	7	7	Carbamidomethylation	27366000	23560000	17893000	33308000	40272000	29864000	21667000	19613000	30218000	23005000	24356000	22904000	28060000	29484000	20535000	16957000	9943500	9573800	17175000	22462000	15406000	11916000	8161300	16306000	13206000	14109000	13374000	15577000	17663000	11459000	28480000	24873000	25068000	15222000	12999000	14436000	115178	contactin-1a-like [Carassius auratus]
457	698	XP_026129414.1	2.54	3	2	2		13085000	9953800	5501400	5004200	6374300	10199000	11634000	4471000	8692600	8729600	9535900	6831400	13046000	8965100	9764400	13085000	9953800	5501400	5004200	6374300	10199000	11634000	4471000	8692600	8729600	9535900	6831400	13046000	8965100	9764400	7983800	8745300	9868800	7983800	8745300	9868800	149217	synaptojanin-1-like isoform X12 [Carassius auratus]
458	809	XP_026078229.1	1.96	10	2	2		0	848570	2526300	733720	3585300	0	4040500	1021200	4464500	0	707140	6881400	7154300	0	0	0	848570	2526300	733720	3585300	0	4040500	1021200	4464500	0	707140	6881400	7154300	0	0	3253300	4308800	4914300	3253300	4308800	4914300	60993	calcium/calmodulin-dependent protein kinase type II subunit gamma-like isoform X11 [Carassius auratus]
459	972	XP_026121927.1	1.27	3	2	2		3708000	3273200	2389800	5408900	5497100	4067400	3611200	2923300	4578800	2629700	3455900	4863200	3872300	2890400	1819800	3708000	3273200	2389800	5408900	5497100	4067400	3611200	2923300	4578800	2629700	3455900	4863200	3872300	2890400	1819800	4055400	3846500	3618600	4055400	3846500	3618600	126276	solute carrier family 12 member 5-like isoform X2 [Carassius auratus]
460	2359	XP_026111286.1	10.45	27	5	5		60392000	27177000	29804000	22423000	24075000	46581000	38430000	21599000	29739000	26057000	47104000	42625000	45583000	37423000	52469000	55698000	25169000	26069000	21317000	22166000	43298000	35613000	17410000	28005000	24195000	43483000	39453000	42998000	33400000	44504000	38093000	35939000	47334000	35299000	33162000	40767000	22946	adenylate kinase isoenzyme 1-like isoform X1 [Carassius auratus]
461	1932	XP_026066209.1	0.01	36	7	7		128260000	90321000	87183000	79647000	79571000	100100000	92030000	98443000	86937000	89584000	91034000	96481000	118970000	107030000	106030000	101780000	83525000	75490000	66980000	72292000	87072000	85581000	85396000	77046000	63692000	80653000	90555000	104170000	61316000	63912000	95820000	97250000	108580000	80701000	79757000	80371000	26033	V-type proton ATPase subunit E 1-like [Carassius auratus]
462	1805	XP_026055099.1	2.19	37	11	11	Carbamidomethylation	104370000	61703000	38028000	36785000	117240000	82091000	105490000	36686000	104460000	70767000	89031000	108360000	129540000	74537000	50871000	43171000	42851000	16612000	22291000	55014000	47887000	59407000	18534000	62802000	28763000	53367000	55029000	96825000	34068000	23159000	90219000	87675000	101400000	41060000	43479000	59006000	47978	synaptotagmin-2-like isoform X2 [Carassius auratus]
463	4434	XP_026077670.1	4.28	23	3	3	Carbamidomethylation	49138000	54872000	25295000	65843000	70942000	42530000	48607000	22997000	52773000	29834000	46715000	39586000	59175000	38039000	23975000	41438000	43821000	22788000	57864000	61000000	35087000	36164000	18287000	41230000	26767000	38475000	32767000	37173000	38039000	22791000	53218000	39348000	43410000	45382000	31507000	33849000	20175	F-box only protein 2-like [Carassius auratus]
464	914	XP_026140442.1	3.25	29	11	11	Carbamidomethylation	44926000	26267000	35247000	49336000	49073000	44783000	30940000	35369000	47121000	33647000	43738000	41035000	43989000	44601000	35498000	24299000	7065900	22187000	23730000	24493000	24299000	13023000	19068000	25243000	21478000	24439000	22960000	18840000	26752000	24082000	42982000	40803000	44061000	21497000	22286000	25281000	60855	propionyl-CoA carboxylase beta chain mitochondrial-like [Carassius auratus]
465	665	XP_026146053.1	4.62	9	4	4	Acetylation (Protein N-term)	9219300	6220500	10569000	15696000	3559600	13201000	11145000	11937000	9868300	11742000	10953000	12204000	16711000	9953900	13582000	8927200	5473500	10082000	15604000	3492300	12578000	10742000	11473000	9609400	11540000	10424000	11733000	16251000	9713500	13167000	9052800	11579000	12843000	8715800	11189000	12421000	60749	LOW QUALITY PROTEIN: EH domain-containing protein 3-like [Carassius auratus]
466	2012	XP_026107742.1	0.48	20	4	4	Carbamidomethylation	9589900	313630000	177400000	635170000	253240000	13659000	263830000	311240000	375370000	238250000	17878000	357220000	33567000	230430000	325780000	9589900	311210000	177400000	634640000	252340000	12824000	261050000	309560000	374090000	238250000	16239000	356000000	27761000	230430000	325780000	278320000	240800000	240540000	277040000	239160000	237650000	27824	14-3-3 protein beta/alpha-A-like [Carassius auratus]
467	4940	XP_026068836.1	2.41	27	6	6	Carbamidomethylation	139850000	124100000	82611000	153080000	178740000	132980000	126390000	86795000	159040000	127910000	139920000	141310000	134950000	177710000	114450000	118260000	100240000	71583000	110050000	142270000	117760000	106230000	71280000	135720000	110400000	120240000	131900000	111530000	146220000	94920000	135860000	128950000	146560000	108670000	108390000	120960000	33857	cytochrome c1 heme protein mitochondrial-like [Carassius auratus]
468	1238	XP_026067745.1	2.52	8	9	9		49844000	35620000	28930000	40023000	23218000	46505000	35299000	21659000	36447000	29445000	39908000	50296000	44822000	36051000	38958000	35679000	21677000	21491000	15565000	12542000	30631000	21263000	14668000	21702000	23325000	28237000	34833000	17831000	23004000	24028000	41337000	39186000	44360000	21391000	22318000	25586000	227407	microtubule-associated protein 1B-like [Carassius auratus]
469	2274	XP_026143325.1	0.09	11	2	2		666020	21521000	3344200	18449000	22341000	6584600	25464000	8636700	18649000	255930	10657000	15524000	21699000	395470	0	666020	21521000	3344200	18449000	22341000	6584600	25464000	8636700	18649000	255930	10657000	15524000	21699000	395470	0	15943000	11918000	13538000	15943000	11918000	13538000	31196	calretinin-like [Carassius auratus]
470	1587	XP_026096314.1	0.83	14	4	4	Carbamidomethylation	8538800	10539000	4037200	11994000	13932000	7972500	8904100	5999000	12354000	4744700	9609800	10438000	14939000	7207800	5857900	8538800	10539000	4037200	11994000	13932000	7972500	8904100	5999000	12354000	4744700	8370900	8455800	12709000	7207800	5333900	9808200	7994900	10653000	9808200	7994900	8985900	64953	NAD-dependent malic enzyme mitochondrial-like [Carassius auratus]
471	1979	XP_026087140.1	3.03	4	1	1		1871800	3130900	1071300	4626000	4349700	2054100	2088400	2225500	2562200	824410	1891500	2378000	3186300	1359900	614940	1871800	3130900	1071300	4626000	4349700	2054100	2088400	2225500	2562200	824410	1891500	2378000	3186300	1359900	614940	3010000	1950900	1886100	3010000	1950900	1886100	40327	guanine nucleotide-binding protein G(i) subunit alpha-1-like [Carassius auratus]
472	1995	XP_026134689.1	1.13	15	3	3		54301000	85013000	28887000	116580000	110740000	59360000	71519000	41666000	78199000	42743000	61261000	43315000	98564000	83984000	41616000	54301000	85013000	28887000	116580000	110740000	59360000	71519000	41666000	78199000	42743000	61261000	43315000	98564000	83984000	41616000	79105000	59217000	69858000	79105000	59217000	69858000	30398	voltage-dependent anion-selective channel protein 2 [Carassius auratus]
473	1484	XP_026094943.1	3.75	10	2	2	Carbamidomethylation	18813000	15484000	14169000	13061000	14733000	15444000	14769000	9355600	12472000	14696000	19195000	20021000	16020000	12642000	12196000	18813000	15484000	14169000	13061000	14733000	15444000	14769000	9355600	12472000	14696000	19195000	20021000	16020000	12642000	12196000	16080000	13708000	16015000	16080000	13708000	16015000	53704	dihydrolipoyl dehydrogenase mitochondrial-like [Carassius auratus]
474	468	XP_026052723.1	0.54	14	12	12	Carbamidomethylation	18823000	18989000	12808000	23475000	34194000	21608000	23695000	16824000	26820000	16371000	20796000	17323000	33662000	17978000	12336000	12251000	11466000	7585100	10583000	18900000	14113000	12891000	9977200	16730000	10214000	12736000	11902000	15553000	12187000	7771900	24580000	21566000	23856000	12928000	12785000	12592000	159013	WD repeat-containing protein 7 isoform X2 [Carassius auratus]
475	2047	XP_026139625.1	6.58	4	2	2		10196000	9834800	7284900	17932000	15226000	9384700	7770100	8249700	10561000	5314000	9739000	10708000	8951700	6359200	4295800	10196000	9834800	7284900	17932000	15226000	9384700	7770100	8249700	10561000	5314000	9739000	10708000	8951700	6359200	4295800	12308000	8255900	8669400	12308000	8255900	8669400	93078	clathrin coat assembly protein AP180-like isoform X3 [Carassius auratus]
477	923	XP_026146925.1	3.48	8	4	4	Carbamidomethylation	50919000	31374000	14641000	31493000	12120000	30115000	23530000	17468000	14178000	24026000	27807000	25446000	40257000	31028000	22337000	49267000	31374000	14641000	30462000	8819600	28325000	23530000	14506000	14178000	24026000	26080000	25446000	21442000	31028000	22337000	32726000	25389000	35538000	30731000	23014000	25267000	118189	uncharacterized protein LOC113120971 isoform X1 [Carassius auratus]
478	2262	XP_026085870.1	0.66	6	1	1		10195000	15823000	2401200	5754200	9737400	13051000	21524000	6131100	15389000	3219400	13658000	14676000	44405000	1823200	2272300	10195000	15823000	2401200	5754200	9737400	13051000	21524000	6131100	15389000	3219400	13658000	14676000	44405000	1823200	2272300	8782200	11863000	15367000	8782200	11863000	15367000	22229	visinin-like protein 1 [Carassius auratus]
479	1490	XP_026052094.1	14.19	4	2	2		2786100	4690900	1460900	2588800	2753500	2556100	2113500	1175400	3565800	775630	637090	1504100	1682200	525280	1148600	2786100	4690900	1460900	2588800	2753500	2556100	2113500	1175400	3565800	775630	637090	1504100	1682200	525280	1148600	3454700	2148700	1571000	3454700	2148700	1571000	114596	sarcoplasmic/endoplasmic reticulum calcium ATPase 2-like [Carassius auratus]
480	1779	XP_026130999.1	0.21	24	6	6	Carbamidomethylation	26215000	31061000	29669000	49393000	66477000	40271000	42916000	31325000	53012000	29020000	32324000	31799000	49419000	34604000	29064000	23959000	27956000	21025000	45399000	60099000	36511000	30880000	22598000	38412000	27407000	28541000	27304000	44976000	31938000	26474000	44191000	44564000	35568000	37654000	33254000	31846000	40538	guanine nucleotide-binding protein G(i) subunit alpha-2-like [Carassius auratus]
481	2044	XP_026084149.1	4.31	5	2	2		4637000	3088900	2874400	5482700	5094000	3834100	4255400	3983200	4029500	1167200	4219200	4319800	3960900	1405600	1058000	4637000	3088900	2874400	5482700	5094000	3834100	4255400	3983200	4029500	1167200	4219200	4319800	3960900	1405600	1058000	4235400	3814400	3257200	4235400	3814400	3257200	90297	clathrin coat assembly protein AP180-like isoform X5 [Carassius auratus]
482	1554	XP_026062168.1	7.65	26	4	4	Acetylation (Protein N-term)	26593000	22172000	13426000	12172000	24002000	33566000	30594000	18234000	32565000	21246000	28104000	27800000	50509000	19839000	25664000	23306000	20558000	12969000	10927000	21880000	29226000	27274000	17231000	29460000	18829000	25348000	26793000	47531000	18745000	23975000	19673000	27241000	30383000	17928000	24404000	28479000	33297	prohibitin-2-like [Carassius auratus]
483	635	XP_026075567.1	8.31	1	1	1		3540400	2140900	2396100	1112000	1460400	3626400	2742200	1244700	2326500	2479400	3295800	2992500	4408400	2374900	3039200	3540400	2140900	2396100	1112000	1460400	3626400	2742200	1244700	2326500	2479400	3295800	2992500	4408400	2374900	3039200	2130000	2483800	3222100	2130000	2483800	3222100	171485	synaptojanin-1-like isoform X6 [Carassius auratus]
484	3055	XP_026061005.1	9.45	7	3	3		336380000	350600000	217550000	499720000	345650000	256980000	225780000	183720000	223850000	206490000	213500000	71981000	192850000	265280000	207960000	156410000	274260000	95731000	349180000	239790000	143090000	178230000	133970000	157600000	71995000	139780000	52012000	169220000	74735000	64394000	351220000	219930000	193910000	223080000	136980000	100030000	29287	myelin protein P0-like isoform X1 [Carassius auratus]
485	1922	XP_026138171.1	6.65	10	3	3	Acetylation (Protein N-term)	11657000	7065600	3632100	12947000	4639900	10479000	6089400	852090	3787900	4947300	7660700	10443000	8133500	8941200	10638000	11657000	7065600	3632100	12947000	4639900	10479000	6089400	852090	3787900	4947300	7660700	10443000	8133500	8941200	10638000	8098400	6803700	9163200	8098400	6803700	9163200	65155	serine/threonine-protein phosphatase 2A 65 kDa regulatory subunit A beta isoform-like [Carassius auratus]
486	4518	XP_026075365.1	0.94	45	3	3	Acetylation (Protein N-term)	171720000	165610000	131210000	230070000	276140000	183520000	181920000	144040000	236360000	140360000	167170000	183260000	184910000	201940000	125340000	155080000	153970000	122420000	211040000	251540000	170460000	181920000	131940000	219930000	127330000	154780000	170880000	168830000	181050000	113920000	195280000	180260000	173860000	179140000	166610000	159240000	12241	vesicle-associated membrane protein 2-like [Carassius auratus]
487	1764	XP_026078741.1	5.5	24	6	6	Carbamidomethylation	47836000	38036000	36516000	37700000	46234000	30601000	38779000	23094000	38272000	39042000	37369000	38797000	45771000	48301000	36695000	37042000	25032000	27897000	25759000	31865000	22093000	27870000	16585000	27913000	29690000	26242000	28047000	30408000	37276000	30717000	41478000	36497000	45203000	29519000	24830000	30538000	46025	26S proteasome regulatory subunit 8-like [Carassius auratus]
488	1586	XP_026102286.1	0.88	12	3	3		14145000	15503000	6855500	2704300	20946000	13213000	12012000	8712300	17098000	10627000	15373000	17669000	17862000	14194000	5348600	14145000	15503000	6855500	2704300	20946000	13213000	12012000	8712300	17098000	10627000	15373000	17669000	17862000	14194000	5348600	15039000	12332000	16277000	15039000	12332000	16277000	65790	NAD-dependent malic enzyme mitochondrial-like [Carassius auratus]
489	2173	XP_026112486.1	4.52	7	2	2		13699000	16383000	9388300	15285000	19975000	17224000	9629200	11109000	10748000	8926100	11657000	13804000	14958000	10186000	9529800	13699000	16383000	9388300	15285000	19975000	17224000	9629200	11109000	10748000	8926100	11657000	13804000	14958000	10186000	9529800	14946000	11527000	12027000	14946000	11527000	12027000	46245	eukaryotic initiation factor 4A-I-like isoform X1 [Carassius auratus]
490	3218	XP_026086430.1	3.06	45	9	9	Carbamidomethylation	163240000	216700000	148270000	226780000	265270000	190480000	176330000	187110000	236470000	129710000	183410000	191350000	266170000	169310000	135030000	98982000	137720000	84214000	188690000	189660000	105960000	96073000	107870000	155880000	68449000	104570000	100630000	164030000	105910000	66822000	208290000	184400000	190820000	141460000	106850000	108390000	32159	ATP synthase subunit gamma mitochondrial isoform X2 [Carassius auratus]
491	2057	XP_026089990.1	5.65	16	3	3	Acetylation (Protein N-term)	70287000	75983000	16979000	53502000	73849000	53819000	72872000	25051000	77453000	66900000	71907000	78725000	75009000	87050000	64153000	70287000	75983000	16979000	53502000	73849000	53819000	72872000	25051000	77453000	66900000	71907000	78725000	75009000	87050000	64153000	59538000	62823000	75369000	59538000	62823000	75369000	30502	voltage-dependent anion-selective channel protein 1 [Carassius auratus]
492	1808	XP_026139034.1	5.93	10	2	2		11608000	7112300	8840200	6321300	10997000	8776300	9221800	8404800	8659000	7872200	8093200	9203800	13193000	10992000	10016000	11608000	7112300	8840200	6321300	10997000	8776300	9221800	8404800	8659000	7872200	8093200	9203800	13193000	10992000	10016000	8975700	8586800	10300000	8975700	8586800	10300000	48489	septin-7-like isoform X2 [Carassius auratus]
493	2751	XP_026126389.1	3.82	10	4	4	Carbamidomethylation	274400000	246060000	197040000	265590000	381210000	359540000	296050000	118280000	378770000	284550000	312070000	323980000	357090000	294980000	280850000	270760000	245080000	194750000	264740000	379330000	355450000	294340000	116250000	377180000	280790000	309040000	321270000	356710000	291570000	276270000	272860000	287440000	313790000	270930000	284800000	310970000	50331	probable glutamate receptor [Carassius auratus]
494	2094	XP_026140821.1	4.5	35	5	5	Carbamidomethylation; Oxidation (M)	153990000	191070000	177560000	353960000	227900000	144160000	175870000	197410000	234640000	149780000	172810000	188190000	134240000	191000000	167650000	140090000	162650000	165070000	311360000	211900000	122160000	151220000	171360000	209190000	144540000	143810000	160920000	98678000	181310000	149180000	222910000	181870000	172330000	198220000	159700000	146780000	27957	14-3-3 protein zeta-like [Carassius auratus]
495	1970	XP_026136897.1	3.21	13	3	3	Carbamidomethylation	18179000	20399000	13729000	27294000	28859000	20043000	21719000	8845200	24512000	13303000	18318000	22676000	29459000	10101000	4697200	18179000	20399000	13729000	27294000	28859000	20043000	21719000	8845200	24512000	13303000	18318000	22676000	29459000	10101000	4697200	21692000	17685000	18654000	21692000	17685000	18654000	50425	elongation factor 1-gamma [Carassius auratus]
496	5338	XP_026067689.1	0.07	41	6	6	Oxidation (M)	694300000	1157000000	874240000	1541400000	1254200000	926110000	2081200000	869410000	1676900000	832210000	966140000	1115600000	1846500000	1056400000	602660000	503460000	748080000	504030000	1037800000	955190000	653400000	1380900000	490060000	1064800000	472570000	662760000	745740000	1244800000	721240000	382020000	1113900000	1281400000	1123400000	749710000	812350000	751310000	15616	hemoglobin subunit alpha [Carassius auratus]
497	2139	XP_026099228.1	7.6	10	2	2		0	9393500	942540	4839500	7271700	2836500	2518100	4159100	10022000	224470	6499100	8792200	12236000	0	0	0	9393500	942540	4839500	7271700	2836500	2518100	4159100	10022000	224470	6499100	8792200	12236000	0	0	5611800	4285900	9175600	5611800	4285900	9175600	31230	calretinin-like [Carassius auratus]
499	1497	XP_026135485.1	0.19	11	5	5		14403000	18929000	8415400	14370000	22070000	16239000	14320000	11762000	21067000	9830100	20219000	18993000	28368000	10430000	7720700	9881500	18451000	8415400	13163000	19151000	10600000	12448000	11762000	20091000	8974300	17114000	18993000	20441000	6812900	7720700	20819000	18994000	21675000	16007000	14955000	16056000	79351	MICOS complex subunit MIC60 isoform X3 [Carassius auratus]
500	2270	XP_026065647.1	1.62	4	1	1		1986500	2423300	755500	3150300	4026400	2337800	2461000	1697400	3114700	939550	1789000	2231400	3300200	937570	566440	1986500	2423300	755500	3150300	4026400	2337800	2461000	1697400	3114700	939550	1789000	2231400	3300200	937570	566440	2468400	2110100	1764900	2468400	2110100	1764900	40327	guanine nucleotide-binding protein G(i) subunit alpha-1 [Carassius auratus]
501	3662	XP_026116464.1	0	79	6	6	Acetylation (Protein N-term); Oxidation (M)	1448100000	1220200000	963160000	2760200000	1938200000	1289700000	1508400000	1415900000	1801800000	1145300000	1347500000	1542600000	1854300000	1015500000	1222200000	1230700000	683360000	843590000	2396200000	1547300000	1134200000	1222900000	1231400000	1498700000	1087600000	1115900000	1268500000	1733400000	958690000	1179900000	1900600000	1435200000	1406600000	1570800000	1235000000	1251300000	16838	calmodulin [Carassius auratus]
502	621	XP_026059230.1	1.89	12	6	6	Carbamidomethylation; Acetylation (Protein N-term)	32995000	30178000	26674000	15262000	15745000	7866800	27063000	20924000	17099000	20759000	27385000	19158000	21994000	16526000	25700000	27438000	23484000	22704000	11440000	12508000	4127000	23067000	18600000	12287000	18463000	21651000	17119000	16182000	15313000	21485000	24904000	21578000	22530000	19674000	17813000	18384000	96818	major vault protein isoform X2 [Carassius auratus]
503	1392	XP_026064075.1	4.56	20	5	5	Carbamidomethylation	11028000	26490000	10103000	29529000	28883000	9630600	13295000	10314000	14004000	5518000	14735000	9126500	35678000	7297300	10518000	6993400	24474000	6912900	25751000	26786000	7923300	12113000	9935200	12677000	1154300	12931000	8789200	34597000	1441100	5118900	24719000	13729000	17757000	21457000	10857000	13731000	50523	coronin-1A-like [Carassius auratus]
504	2385	XP_026125919.1	3.41	10	2	2	Acetylation (Protein N-term)	18436000	12845000	11033000	15165000	21421000	14291000	12096000	9184000	15410000	13097000	13155000	12151000	16458000	19720000	11388000	18436000	12845000	11033000	15165000	21421000	14291000	12096000	9184000	15410000	13097000	13155000	12151000	16458000	19720000	11388000	15780000	12816000	14574000	15780000	12816000	14574000	32801	F-actin-capping protein subunit alpha-1-like [Carassius auratus]
505	2070	XP_026063772.1	10.33	28	5	5	Carbamidomethylation	50333000	56932000	51091000	32967000	60485000	71061000	65259000	54122000	79837000	43774000	66037000	85106000	79648000	60334000	73699000	35884000	47625000	43643000	25369000	50359000	61542000	56751000	49321000	69816000	31164000	57177000	74173000	69998000	42798000	61078000	55647000	73859000	73599000	45861000	64213000	61045000	29662	prohibitin [Carassius auratus]
506	3361	XP_026112458.1	0.66	17	3	3		79211000	41484000	70554000	195560000	88550000	100270000	80189000	76742000	107060000	96454000	77072000	104660000	107230000	105390000	108390000	73844000	41484000	70554000	158200000	80523000	90883000	63906000	67195000	88329000	96454000	66506000	86678000	73856000	100590000	105070000	111780000	98521000	100760000	94859000	85034000	86758000	41172	electrogenic sodium bicarbonate cotransporter 1-like partial [Carassius auratus]
507	1788	XP_026128795.1	4.46	13	7	7	Carbamidomethylation	22956000	13390000	15177000	19491000	24633000	17918000	20578000	12945000	26180000	12276000	21174000	21423000	23508000	23790000	14958000	17510000	9762000	11185000	10971000	13733000	12187000	13967000	8188500	18155000	10801000	13320000	13224000	16488000	19020000	12622000	20440000	18267000	21619000	12632000	12660000	14935000	100505	catenin alpha-2 isoform X1 [Carassius auratus]
508	2809	XP_026081741.1	1.78	4	1	1		6747800	166440	3097600	360560	572160	1972100	164820	175390	0	8226000	930130	998000	403940	13793000	8212800	6747800	166440	3097600	360560	572160	1972100	164820	175390	0	8226000	930130	998000	403940	13793000	8212800	2188900	2634600	4867600	2188900	2634600	4867600	34101	protein NipSnap homolog 2-like [Carassius auratus]
509	625	XP_026125542.1	1.37	21	13	13	Carbamidomethylation	82015000	71001000	60440000	48386000	80946000	77662000	74934000	62750000	72572000	61007000	77760000	77267000	75442000	71939000	61452000	46653000	32182000	41661000	17526000	40353000	42774000	36647000	39380000	37829000	40476000	39155000	43414000	25487000	48465000	41827000	71737000	71014000	77130000	37239000	39421000	41075000	115858	2-oxoglutarate dehydrogenase mitochondrial isoform X3 [Carassius auratus]
510	1480	XP_026084481.1	16.59	4	1	1		69860	0	0	0	0	566660	0	459920	0	2003600	0	0	0	3454300	1452400	69860	0	0	0	0	566660	0	459920	0	2003600	0	0	0	3454300	1452400	69860	1010100	2453300	69860	1010100	2453300	92588	ubiquitin carboxyl-terminal hydrolase 5-like isoform X4 [Carassius auratus]
511	4140	XP_026141209.1	1.99	10	2	2		10074000	7129700	9710900	7905800	6420100	7841900	6635400	5576300	9281000	7202400	8819900	10264000	6763400	5962500	6978100	8441300	7129700	7932400	7905800	6420100	7530100	6635400	5576300	9281000	5408000	8721600	9968100	6763400	5962500	5132100	9271300	7939300	8056300	7565800	6886100	7309500	32211	carbonic anhydrase-related protein-like [Carassius auratus]
512	2078	XP_026055162.1	0.35	13	2	2		19130000	20356000	16838000	13105000	19216000	19154000	19299000	17042000	20279000	9014300	18911000	21564000	24252000	19280000	7894600	19130000	20356000	16838000	13105000	19216000	19154000	19299000	17042000	20279000	9014300	18911000	21564000	24252000	19280000	7894600	17729000	16958000	20892000	17729000	16958000	20892000	41695	protein NDRG3-like isoform X3 [Carassius auratus]
513	4315	XP_026143058.1	0.09	48	7	7	Carbamidomethylation	122850000	190520000	78905000	156920000	200970000	119320000	187000000	82540000	209750000	85594000	171640000	166420000	201180000	81418000	73993000	100480000	126310000	68545000	102020000	139260000	97888000	140250000	55957000	163000000	80010000	139410000	136150000	123050000	76472000	71149000	150030000	136840000	140530000	107320000	107420000	109250000	16009	coactosin-like protein [Carassius auratus]
514	3067	XP_026123347.1	1.32	33	10	10	Carbamidomethylation	106640000	92667000	63203000	70233000	136550000	120810000	85860000	56584000	95502000	73237000	85178000	98207000	119300000	89251000	70891000	62764000	48414000	40612000	46318000	66297000	65202000	47982000	40394000	48353000	39100000	50860000	61458000	56289000	47593000	43250000	96224000	88259000	102690000	52881000	48206000	51890000	40110	V-type proton ATPase subunit d 1-like [Carassius auratus]
515	1168	XP_026068857.1	0.4	16	5	5	Carbamidomethylation	25471000	16876000	11612000	19596000	19015000	19846000	17812000	8296300	20962000	18358000	20813000	21810000	16269000	20339000	19313000	24785000	15682000	11612000	17349000	18101000	18705000	16598000	7922400	19733000	18358000	18581000	19939000	9604200	19071000	16931000	19635000	17749000	20027000	17506000	16263000	16825000	55687	probable aminopeptidase NPEPL1 [Carassius auratus]
516	460	XP_026053652.1	6.24	4	2	2		3124800	6801800	6901100	2594200	6469400	10999000	9502100	9795900	6505700	4691400	8300200	8254500	7821800	2422400	6420100	3124800	6801800	6901100	2594200	6469400	10999000	9502100	9795900	6505700	4691400	8300200	8254500	7821800	2422400	6420100	5178300	8298700	6643800	5178300	8298700	6643800	108512	26S proteasome non-ATPase regulatory subunit 1-like [Carassius auratus]
517	2038	XP_026067672.1	1.39	27	7	7	Carbamidomethylation	41037000	33603000	23079000	43000000	48231000	38863000	34919000	19020000	41920000	41976000	40141000	43995000	31536000	60075000	41580000	34198000	21805000	17492000	25654000	25850000	28670000	18477000	11318000	26334000	29032000	25977000	24777000	16724000	43235000	26720000	39783000	37189000	44729000	25000000	22766000	27487000	39897	guanine nucleotide-binding protein G(o) subunit alpha-like [Carassius auratus]
518	2333	XP_026062450.1	1.64	12	2	2		1565300	1435300	1276200	4071000	1624500	1664000	1859400	1094900	1992500	788060	1592800	1680600	1937600	1606400	1045000	1565300	1435300	1276200	4071000	1624500	1664000	1859400	1094900	1992500	788060	1592800	1680600	1937600	1606400	1045000	2146400	1845300	1851100	2146400	1845300	1851100	25044	ras-related protein Rab-3A-like [Carassius auratus]
519	1567	XP_026058525.1	0.64	16	4	4	Carbamidomethylation	21239000	27024000	19905000	27065000	47773000	19239000	38063000	24554000	42960000	32655000	26707000	22410000	65268000	35307000	23895000	20186000	26173000	18063000	27065000	43576000	17894000	34555000	18449000	38354000	31486000	25576000	22278000	57237000	35307000	19619000	31247000	33414000	35396000	29261000	30067000	32004000	53668	dihydrolipoyl dehydrogenase mitochondrial-like [Carassius auratus]
520	1730	XP_026102731.1	2.1	5	1	1		5158200	13083000	5032800	3329900	5156500	8654400	10342000	10410000	6930500	3178600	8890100	8874400	11612000	1172300	1827700	5158200	13083000	5032800	3329900	5156500	8654400	10342000	10410000	6930500	3178600	8890100	8874400	11612000	1172300	1827700	6352000	7903000	6475200	6352000	7903000	6475200	58737	serine--tRNA ligase cytoplasmic-like [Carassius auratus]
521	2729	XP_026109834.1	1.16	9	2	2		5629200	8258300	4137300	8558200	10768000	9062100	10956000	6565600	11922000	4620400	9402800	10574000	18065000	2425800	1698900	5629200	8258300	4137300	8558200	10768000	9062100	10956000	6565600	11922000	4620400	9402800	10574000	18065000	2425800	1698900	7470300	8625300	8433300	7470300	8625300	8433300	42066	guanine nucleotide-binding protein subunit alpha-11-like [Carassius auratus]
522	2284	XP_026125849.1	7.99	12	2	2		11410000	5644500	7144200	10601000	6085400	5665300	2972000	4100700	4392900	8060000	5790500	4718800	2926800	13409000	10959000	11410000	5644500	7144200	10601000	6085400	5665300	2972000	4100700	4392900	8060000	5790500	4718800	2926800	13409000	10959000	8177000	5650200	8752400	8177000	5650200	8752400	35072	annexin A5-like [Carassius auratus]
523	2010	XP_026126989.1	1.34	31	5	5		19807000	28498000	15518000	13122000	19571000	18248000	31279000	28842000	31794000	12923000	17712000	19515000	48918000	8191200	8475200	14607000	24097000	12474000	10900000	14614000	13766000	25746000	26796000	25875000	7310300	13600000	15811000	44479000	5383500	5690600	28791000	26905000	45446000	24826000	22187000	41877000	38866	endophilin-A1-like [Carassius auratus]
524	789	XP_026118104.1	3.42	1	2	2		14278000	10448000	10280000	19180000	20787000	13037000	13954000	10064000	9765100	7164300	11231000	9208300	14729000	12726000	10800000	11302000	6121200	7333100	14515000	15272000	9243500	10090000	7382500	7544100	5039000	7762400	6767000	11908000	6982800	7227000	14994000	10797000	11739000	10909000	7859800	8129300	181912	complement C3-like [Carassius auratus]
525	994	XP_026070533.1	4.2	1	1	1		12904000	10865000	5723700	11138000	16905000	8353200	8597600	5445900	10995000	7168800	9152000	8139700	11861000	12738000	6016900	12904000	10865000	5723700	11138000	16905000	8353200	8597600	5445900	10995000	7168800	9152000	8139700	11861000	12738000	6016900	11507000	8112100	9581400	11507000	8112100	9581400	122880	LOW QUALITY PROTEIN: solute carrier family 12 member 5-like [Carassius auratus]
526	2566	XP_026095242.1	3.92	3	1	1		14587000	33095000	0	68869000	47319000	20508000	24892000	22222000	27918000	17000000	21660000	13763000	30622000	24465000	15143000	14587000	33095000	0	68869000	47319000	20508000	24892000	22222000	27918000	17000000	21660000	13763000	30622000	24465000	15143000	40968000	22508000	21130000	40968000	22508000	21130000	56939	excitatory amino acid transporter 2-like isoform X3 [Carassius auratus]
527	1267	XP_026099229.1	0.61	18	4	4	Carbamidomethylation	24704000	35836000	19173000	32786000	37614000	29804000	36383000	30887000	41852000	17435000	34397000	41128000	52229000	15664000	14797000	19338000	31538000	15595000	27648000	31547000	24864000	31862000	27307000	35203000	13696000	27762000	33100000	42848000	10476000	9505000	31082000	31272000	33265000	26192000	26586000	26360000	47385	aspartate aminotransferase mitochondrial-like [Carassius auratus]
528	1019	XP_026094809.1	6.41	8	2	2		1094300	146860	617000	33763	0	415410	398500	0	66483	716440	639040	1111300	5057900	268020	1255500	1094300	146860	617000	33763	0	415410	398500	0	66483	716440	639040	1111300	5057900	268020	1255500	472970	568910	5583500	472970	568910	5583500	76880	dynamin-1-like protein isoform X2 [Carassius auratus]
529	805	XP_026070440.1	2.6	4	1	1		10568000	12076000	13089000	27492000	5191400	15788000	19130000	16927000	21656000	11485000	15280000	17341000	31062000	7882100	11065000	10568000	12076000	13089000	27492000	5191400	15788000	19130000	16927000	21656000	11485000	15280000	17341000	31062000	7882100	11065000	13990000	17335000	17208000	13990000	17335000	17208000	60797	EH domain-containing protein 3-like isoform X2 [Carassius auratus]
530	2980	XP_026127489.1	0.72	35	5	5	Carbamidomethylation	178280000	117860000	126780000	110000000	154590000	138200000	119520000	114720000	144710000	124450000	117520000	120440000	127100000	152070000	113840000	169850000	107850000	123980000	99844000	143410000	134100000	103960000	108010000	127260000	124430000	112260000	118820000	103370000	151260000	113200000	138480000	131150000	131680000	128990000	119550000	120350000	22581	ATP synthase subunit O mitochondrial-like [Carassius auratus]
531	2619	XP_026104701.1	3.88	39	9	9	Carbamidomethylation; Oxidation (M)	107260000	87146000	68541000	110850000	82607000	25827000	80186000	66827000	98141000	78925000	77742000	24745000	117580000	107660000	78759000	63215000	52566000	41949000	75346000	42360000	16898000	46649000	48075000	56498000	44451000	37766000	15565000	73741000	58682000	40487000	96091000	74108000	87507000	58962000	42514000	45814000	45955	isovaleryl-CoA dehydrogenase mitochondrial-like [Carassius auratus]
532	4915	XP_026077561.1	2.37	12	2	2		48073000	36529000	20722000	18623000	30670000	44879000	47982000	15479000	43586000	28689000	47584000	54121000	65043000	27609000	29970000	48073000	36482000	20136000	18585000	30670000	44879000	47982000	15342000	43586000	26499000	47584000	54121000	65043000	23782000	24010000	31013000	36821000	47801000	30789000	35658000	42908000	20121	F-box only protein 2-like [Carassius auratus]
533	1264	XP_026060823.1	0.06	10	10	10		49480000	77919000	25497000	37720000	60516000	58058000	78720000	35410000	28411000	16263000	54505000	42244000	78426000	21193000	21158000	35523000	43614000	18796000	14694000	27548000	40478000	43924000	21501000	18520000	12606000	35924000	29300000	37955000	15191000	17285000	51406000	47675000	52099000	28035000	28038000	28671000	153011	putative leucine-rich repeat-containing protein DDB_G0290503 [Carassius auratus]
534	2090	XP_026128082.1	1.37	18	6	6	Carbamidomethylation	36262000	30941000	30824000	28632000	39142000	31947000	33941000	36643000	37041000	22766000	35986000	41089000	32229000	22479000	26639000	35137000	29802000	29087000	25217000	30798000	28864000	31545000	33412000	30593000	22003000	31867000	36140000	26820000	19917000	23292000	34723000	32988000	32656000	30008000	29283000	27607000	60872	myc box-dependent-interacting protein 1-like isoform X2 [Carassius auratus]
535	1663	XP_026115791.1	2.61	25	6	6		30107000	35977000	16791000	11122000	27203000	37715000	36336000	31753000	29886000	18781000	31324000	38553000	38659000	16817000	18868000	29049000	27971000	16791000	10783000	24262000	35690000	31329000	27141000	25080000	17471000	28357000	34469000	30819000	15336000	17244000	26209000	31263000	31084000	21771000	27342000	26206000	34077	mitochondrial 2-oxoglutarate/malate carrier protein [Carassius auratus]
536	2300	XP_026060196.1	2.16	35	6	6		20108000	28883000	27174000	32918000	36266000	32934000	32282000	38321000	43674000	17728000	24907000	26549000	57798000	17641000	15075000	13701000	23967000	20199000	26945000	28386000	26688000	27707000	33952000	36591000	13293000	20033000	21191000	50463000	9963500	10154000	32127000	35883000	43845000	25081000	29960000	37050000	39235	endophilin-A1-like [Carassius auratus]
537	2093	XP_026098543.1	5.98	24	5	5	Carbamidomethylation	24539000	21271000	16233000	33976000	33272000	17632000	21229000	19238000	28565000	17381000	25835000	21818000	32884000	29612000	20527000	21592000	17388000	13281000	26306000	26849000	10826000	18317000	15687000	23731000	14144000	21821000	19899000	29085000	23286000	16181000	26518000	21696000	26319000	21083000	17369000	22054000	39572	fructose-bisphosphate aldolase B-like [Carassius auratus]
538	1241	XP_026088318.1	1.08	21	6	6	Carbamidomethylation	17975000	22579000	15574000	14698000	26889000	23283000	22257000	9788300	19017000	15367000	21644000	24357000	23353000	13706000	12552000	14105000	12720000	11871000	7548100	15755000	15630000	11705000	6389500	10081000	10492000	15108000	14045000	12372000	7272200	9648900	21238000	19335000	19842000	13135000	11645000	11689000	47164	flotillin-1 [Carassius auratus]
539	2324	XP_026102500.1	4.82	14	2	2	Carbamidomethylation	5328200	5975100	4026000	3587900	6289200	5316500	6470200	6077700	7442800	4661700	5458800	5692000	12206000	5667500	5696000	5328200	5975100	4026000	3587900	6289200	5316500	6470200	6077700	7442800	4661700	5458800	5692000	12206000	5667500	5696000	5041300	5993800	6944000	5041300	5993800	6944000	37949	methylthioribose-1-phosphate isomerase [Carassius auratus]
540	2739	XP_026056546.1	1.15	21	4	4	Carbamidomethylation	39939000	52567000	21138000	25430000	43800000	44120000	64132000	32186000	55396000	24177000	45699000	49635000	92737000	20886000	20898000	39939000	50422000	20850000	24503000	41258000	43589000	62280000	30991000	53672000	23799000	44353000	48625000	85929000	20278000	20727000	37023000	44194000	49636000	35548000	43058000	47647000	35116	annexin A13-like [Carassius auratus]
541	2881	XP_026065455.1	2.56	23	4	4	Carbamidomethylation	48090000	43950000	35905000	37075000	41266000	38062000	41869000	32029000	37265000	44206000	35019000	37428000	54036000	38451000	42286000	36771000	28495000	23439000	30543000	32175000	27025000	26748000	15461000	27716000	32759000	22617000	26530000	39214000	28572000	27714000	41770000	39685000	44046000	30798000	26941000	31532000	20798	ras-related protein Rap-1b [Carassius auratus]
542	1228	XP_026067087.1	2.88	2	1	1		3506800	4299800	2073900	4126000	4615100	4067500	3751700	2453700	5236500	1509000	3398500	2958200	4444600	1915000	130970	3506800	4299800	2073900	4126000	4615100	4067500	3751700	2453700	5236500	1509000	3398500	2958200	4444600	1915000	130970	3724300	3403700	2569500	3724300	3403700	2569500	71860	protein RUFY3-like isoform X4 [Carassius auratus]
543	2149	XP_026099320.1	0.05	12	3	3	Carbamidomethylation; Acetylation (Protein N-term)	4959500	5262900	3863600	4321000	4177800	6050400	5606000	2956100	6222800	2750800	5276800	4399600	9738100	3258400	2888200	4959500	5262900	3863600	4321000	4177800	6050400	5606000	2956100	6222800	2750800	5276800	4399600	9738100	3258400	2888200	5857900	4992300	6036700	5857900	4992300	6036700	36994	serine/threonine-protein phosphatase PP1-gamma catalytic subunit B-like [Carassius auratus]
544	935	XP_026127058.1	0.69	14	10	10	Carbamidomethylation	69692000	37134000	54333000	42906000	48126000	61480000	60612000	33935000	56106000	51334000	60479000	58017000	52261000	40490000	54056000	36719000	14873000	30010000	18511000	24793000	35081000	31460000	12420000	28577000	32584000	33851000	24498000	28162000	18634000	30191000	55204000	57056000	56031000	27180000	30376000	28830000	128394	nck-associated protein 1 isoform X4 [Carassius auratus]
545	1003	XP_026087514.1	9.25	17	5	5		45442000	51502000	32606000	70773000	64714000	33008000	35617000	28697000	45697000	30347000	39863000	27452000	40284000	44557000	38242000	40580000	46326000	29536000	61204000	57583000	30474000	32259000	25428000	41473000	27148000	36306000	26229000	35385000	38983000	34263000	53008000	34673000	38080000	47046000	31356000	34233000	49388	adenylyl cyclase-associated protein 1-like [Carassius auratus]
546	2368	XP_026062939.1	6.65	17	6	6		30682000	44805000	19897000	20810000	26606000	21298000	22571000	17038000	31082000	27025000	24035000	34538000	42033000	29327000	28672000	30682000	24526000	18375000	17459000	22384000	20381000	19823000	15110000	27241000	25837000	23083000	24372000	27959000	26170000	27191000	44407000	24033000	37891000	23083000	21678000	25755000	66590	secretogranin-2-like [Carassius auratus]
548	1913	XP_026098561.1	4.95	15	4	4		34485000	33840000	19471000	32129000	29651000	19039000	21144000	23578000	26249000	18941000	22670000	18698000	34493000	29167000	19400000	28184000	30652000	14881000	24032000	25221000	17420000	19816000	19657000	22530000	14874000	19230000	17795000	32709000	19459000	13431000	29915000	21790000	26932000	24594000	18859000	22571000	45159	acetyl-CoA acetyltransferase mitochondrial [Carassius auratus]
549	2554	XP_026095019.1	5.16	7	3	3		12284000	11417000	4163100	5220200	8079300	7453300	12849000	9616500	8860600	2822800	12592000	11137000	13225000	3743900	4528500	3702400	9832400	2137700	3530500	4719600	4924300	9237000	8868200	4653200	365370	6050300	5558900	10929000	0	0	8232900	8998300	12050000	4784500	5609600	7512700	35203	electron transfer flavoprotein subunit alpha mitochondrial-like [Carassius auratus]
550	1750	XP_026063575.1	11.08	21	8	8	Acetylation (Protein N-term)	87223000	89099000	61448000	155150000	113970000	57596000	58195000	62802000	73940000	62305000	66620000	35700000	65059000	112180000	66466000	82979000	85417000	57730000	144570000	104970000	50043000	52666000	56750000	66124000	59332000	59220000	28527000	59779000	107990000	63373000	104200000	64745000	73214000	95133000	56983000	63778000	75750	microtubule-associated protein tau-like isoform X7 [Carassius auratus]
551	1700	XP_026068132.1	1.56	10	5	5	Carbamidomethylation	30388000	22477000	20110000	43580000	37322000	45045000	21949000	26486000	34062000	26257000	25711000	28145000	32926000	25182000	22726000	25944000	19283000	18437000	41527000	33460000	41200000	19595000	24239000	30587000	24948000	23484000	24167000	27798000	24921000	22229000	31480000	31373000	29538000	28435000	28114000	26786000	100691	heterogeneous nuclear ribonucleoprotein U-like protein 1 [Carassius auratus]
552	2745	XP_026069069.1	2.91	18	1	1	Carbamidomethylation	228790	989900	0	1469300	1275500	0	727170	347580	1379100	141810	1204500	1326900	1366700	425270	0	228790	989900	0	1469300	1275500	0	727170	347580	1379100	141810	1204500	1326900	1366700	425270	0	990870	648910	1080800	990870	648910	1080800	16930	myosin light polypeptide 6-like isoform X2 [Carassius auratus]
553	3019	XP_026111581.1	6.93	11	3	3		35733000	37227000	20059000	42165000	47056000	27948000	28990000	22525000	29960000	11975000	25894000	20300000	30498000	32647000	20326000	35733000	37227000	20059000	42165000	47056000	27948000	28990000	22525000	29960000	11975000	25894000	20300000	30498000	32647000	20326000	36448000	24280000	25933000	36448000	24280000	25933000	26596	glutathione S-transferase A-like [Carassius auratus]
554	1809	XP_026137675.1	6.74	4	2	2		28936000	45283000	23083000	68285000	64959000	31626000	30820000	26701000	35587000	17371000	29272000	26649000	34706000	3477000	22069000	28936000	45283000	23083000	68285000	64959000	31626000	30820000	26701000	35587000	17371000	29272000	26649000	34706000	3477000	22069000	47398000	29135000	28105000	47398000	29135000	28105000	88545	echinoderm microtubule-associated protein-like 2 isoform X1 [Carassius auratus]
555	675	XP_026081797.1	0.55	12	3	3	Carbamidomethylation	7958600	13860000	6289600	4333600	9068100	11651000	12220000	7351600	5443700	5750600	11881000	9952200	15325000	2689000	2077800	7958600	13860000	6289600	4333600	9068100	11651000	12220000	7351600	5443700	5750600	11881000	9952200	15325000	2689000	2077800	8546600	9023200	9840200	8546600	9023200	9840200	46891	flotillin-2 [Carassius auratus]
556	853	XP_026063950.1	9.33	21	13	13	Carbamidomethylation	43242000	37936000	27083000	40328000	47991000	38052000	34495000	26404000	47486000	36083000	38946000	46641000	37482000	50111000	41146000	26344000	15924000	19164000	15578000	19771000	25575000	21111000	12531000	24156000	24246000	24747000	29087000	19554000	29088000	25799000	46165000	42209000	47801000	19356000	21524000	25655000	123960	ubiquitin carboxyl-terminal hydrolase 7 isoform X1 [Carassius auratus]
557	1562	XP_026056238.1	2.73	4	3	3		13151000	9372200	8814700	14507000	18015000	10775000	10600000	7038500	12908000	8846000	11548000	9971700	11670000	16946000	9392500	11385000	5440900	7948400	10806000	13186000	8769500	7184100	4998800	9729700	8193200	8978500	8113800	5848600	16477000	9197400	13501000	10033000	11906000	10483000	7775100	9723000	84978	glycine--tRNA ligase [Carassius auratus]
558	2568	XP_026076049.1	6.64	14	2	2	Carbamidomethylation	5975300	6579500	5271100	12809000	10540000	4568600	5684300	5025200	7541400	3460400	6382800	6696600	1501400	8791100	5490000	5975300	6579500	5271100	12809000	10540000	4568600	5684300	5025200	7541400	3460400	6382800	6696600	1501400	8791100	5490000	8234900	5256000	6988600	8234900	5256000	6988600	23161	ras-related protein rab7-like [Carassius auratus]
559	1863	XP_026059050.1	0.19	11	3	3		12641000	8926800	6878300	14458000	15148000	10542000	13620000	9240100	12299000	9697600	12058000	8796800	9703900	18703000	10403000	12641000	8926800	6878300	14458000	15148000	10542000	13620000	9240100	12299000	9697600	12058000	8796800	9703900	18703000	10403000	12513000	11080000	11933000	12513000	11080000	11933000	59573	catalase-like [Carassius auratus]
560	1837	XP_026051692.1	9.68	3	1	1		4122200	2177500	2680100	5403900	4066600	2115300	1228700	1765200	2162900	3180400	1980900	644130	922400	6945700	3587500	4122200	2177500	2680100	5403900	4066600	2115300	1228700	1765200	2162900	3180400	1980900	644130	922400	6945700	3587500	3690100	2090500	2816100	3690100	2090500	2816100	57310	serine/threonine-protein phosphatase 2B catalytic subunit alpha isoform-like isoform X2 [Carassius auratus]
561	2091	XP_026093505.1	0.28	40	7	7	Carbamidomethylation	55880000	63939000	34289000	51211000	52393000	56107000	66725000	42022000	62137000	30665000	67172000	53742000	86253000	27646000	32440000	49355000	46405000	27287000	29780000	29181000	46358000	49065000	32405000	43967000	23810000	51906000	48480000	56578000	18096000	24627000	54299000	51531000	55297000	39094000	39121000	39938000	28419	proteasome activator complex subunit 1-like [Carassius auratus]
562	2740	XP_026078758.1	1.11	14	4	4		41845000	25852000	20370000	28544000	37561000	34136000	31826000	17631000	36512000	33057000	30426000	26736000	31995000	45360000	27710000	40465000	23234000	19709000	24690000	33590000	32656000	29453000	16062000	34132000	32256000	28906000	26449000	28315000	44490000	27710000	30834000	30632000	32763000	28338000	28912000	31174000	48661	cytochrome b-c1 complex subunit 2 mitochondrial-like isoform X1 [Carassius auratus]
563	1127	XP_026088800.1	3.96	10	4	4		62028000	34630000	19577000	24967000	38172000	39931000	44717000	15583000	48484000	26256000	48656000	53921000	48357000	30965000	35327000	62028000	34169000	19454000	24003000	37021000	39814000	44610000	15487000	47612000	26096000	48502000	53789000	48023000	30965000	35215000	37789000	35465000	44317000	37113000	35195000	44134000	49866	multifunctional protein ADE2-like isoform X3 [Carassius auratus]
564	3137	XP_026076265.1	1.78	5	1	1		1159000	1696300	512350	1015500	2506900	1432400	1472300	1052100	1591000	0	0	1473200	2495100	577010	247500	1159000	1696300	512350	1015500	2506900	1432400	1472300	1052100	1591000	0	0	1473200	2495100	577010	247500	1378000	1387000	1198200	1378000	1387000	1198200	25168	ras-related protein Rab-3C-like [Carassius auratus]
565	3167	XP_026110243.1	3.76	6	1	1	Carbamidomethylation	2638200	3453800	2096700	4646200	6075800	2366300	3129900	1671700	3025000	2850300	3336400	2647400	2555700	3480700	2024500	2638200	3453800	2096700	4646200	6075800	2366300	3129900	1671700	3025000	2850300	3336400	2647400	2555700	3480700	2024500	3782100	2608700	2809000	3782100	2608700	2809000	21912	transforming protein RhoA-like [Carassius auratus]
566	2304	XP_026141222.1	5.06	60	11	11	Carbamidomethylation; Acetylation (Protein N-term)	95833000	111470000	60295000	107210000	130750000	102710000	78590000	59382000	112190000	63177000	94829000	115470000	132280000	65611000	42579000	57778000	68891000	43725000	76791000	79851000	64000000	32300000	39635000	66868000	44090000	60045000	72116000	71801000	45851000	27970000	101470000	89126000	91485000	65407000	54421000	55725000	23515	ras-related protein Rab-2A-like [Carassius auratus]
567	1870	XP_026115775.1	0.62	23	7	7	Carbamidomethylation	77135000	59991000	41413000	42671000	32865000	63837000	74691000	38407000	50856000	46035000	70008000	61826000	73666000	51465000	53827000	60928000	52332000	31716000	37356000	20740000	56302000	63666000	33492000	43941000	29219000	60581000	53089000	52458000	27878000	25300000	53094000	56935000	64554000	40614000	45324000	43861000	40337	phosphoserine aminotransferase-like [Carassius auratus]
568	1309	XP_026061934.1	4.14	8	4	4		31687000	27444000	21665000	31909000	20597000	23630000	20616000	10431000	34569000	15397000	22538000	18350000	28099000	30123000	19297000	30651000	27444000	21460000	31909000	20597000	23124000	20085000	10025000	34569000	15286000	21829000	17934000	27189000	29682000	19297000	27033000	21006000	23805000	26412000	20618000	23186000	79842	adseverin-like [Carassius auratus]
569	2668	XP_026101007.1	6.84	5	1	1	Acetylation (Protein N-term)	13026000	8687300	7079800	12995000	13264000	8827500	6353000	5174900	8774800	9307100	7536200	7509000	6367300	14278000	8412100	13026000	8687300	7079800	12995000	13264000	8827500	6353000	5174900	8774800	9307100	7536200	7509000	6367300	14278000	8412100	11011000	7687500	8820500	11011000	7687500	8820500	32671	F-actin-capping protein subunit alpha-1-like [Carassius auratus]
570	6520	XP_026105136.1	0.67	20	4	4		133260000	94039000	107930000	73586000	94271000	92131000	120200000	87161000	99154000	95101000	103320000	104990000	104510000	94085000	98624000	131020000	91198000	106420000	72699000	93488000	90730000	117710000	85913000	97129000	94204000	101560000	104340000	101110000	93782000	97624000	100690000	98834000	101320000	99032000	97223000	99892000	26397	tubulin polymerization-promoting protein family member 3-like [Carassius auratus]
571	1835	XP_026143323.1	2.62	5	1	1		6585500	11096000	3609500	4017400	6550400	9223900	8736500	12157000	9745100	1829300	7957200	7147500	12659000	306820	455250	6585500	11096000	3609500	4017400	6550400	9223900	8736500	12157000	9745100	1829300	7957200	7147500	12659000	306820	455250	6371800	8338400	5705100	6371800	8338400	5705100	47504	aspartate aminotransferase mitochondrial-like [Carassius auratus]
572	4493	XP_026051814.1	1.85	20	3	3	Carbamidomethylation	24737000	13179000	7864000	4976300	10484000	12231000	14068000	5604900	19900000	13422000	15677000	17029000	22673000	13278000	11691000	23465000	12979000	6786200	4878300	10422000	12231000	13835000	5552200	19634000	11364000	15677000	16994000	22673000	9335400	8727100	13192000	13844000	17915000	12650000	13191000	15601000	20266	peroxiredoxin-5 mitochondrial-like [Carassius auratus]
573	3593	XP_026061006.1	12.17	3	1	1		1304600	0	0	0	0	1226800	1361900	279930	524150	0	329410	0	149190	0	0	1304600	0	0	0	0	1226800	1361900	279930	524150	0	329410	0	149190	0	0	1304600	848180	239300	1304600	848180	239300	27579	myelin protein P0-like isoform X2 [Carassius auratus]
574	470	XP_026065276.1	1.68	6	3	3	Carbamidomethylation	7559600	4762000	1012500	1497400	2759100	5378700	6988600	542120	5793000	2330700	7751200	8542900	16098000	1128900	2126200	7559600	4762000	1012500	1497400	2759100	5378700	6988600	542120	5793000	2330700	7751200	8542900	16098000	1128900	2126200	3815300	6760900	8850100	3815300	6760900	8850100	136217	cullin-associated NEDD8-dissociated protein 1-like [Carassius auratus]
575	1941	XP_026082302.1	8.42	5	1	1		997260	1540700	1481500	459680	1506600	1387500	2628500	3358200	2529500	348460	1570400	3816800	2925300	0	0	997260	1540700	1481500	459680	1506600	1387500	2628500	3358200	2529500	348460	1570400	3816800	2925300	0	0	1197100	2050400	2770800	1197100	2050400	2770800	51139	RNA-binding protein Nova-1-like isoform X2 [Carassius auratus]
576	868	XP_026079421.1	1.46	7	3	3		5369400	11349000	4821600	21516000	12840000	7128900	14571000	3790200	16430000	3891800	12378000	4585300	12796000	4020700	5573500	5369400	11349000	4821600	21516000	12840000	7128900	14571000	3790200	16430000	3891800	12378000	4585300	12796000	4020700	5573500	16043000	12894000	13444000	16043000	12894000	13444000	106468	alpha-actinin-1-like isoform X1 [Carassius auratus]
577	3507	XP_026145089.1	7.66	4	1	1		26205000	28099000	17050000	54108000	35117000	21819000	18843000	20603000	20711000	13686000	21469000	8313200	20561000	30749000	19560000	26205000	28099000	17050000	54108000	35117000	21819000	18843000	20603000	20711000	13686000	21469000	8313200	20561000	30749000	19560000	32116000	19132000	20131000	32116000	19132000	20131000	26137	glutathione S-transferase A-like [Carassius auratus]
578	1721	XP_026078086.1	4.34	8	2	2		7160000	2382600	7622200	6062200	4361000	6674200	1859500	4154000	3484200	5226900	2204100	3665200	2699100	6598100	2441200	7160000	2382600	7622200	6062200	4361000	6674200	1859500	4154000	3484200	5226900	2204100	3665200	2699100	6598100	2441200	6888800	5482900	4718400	6888800	5482900	4718400	74307	dihydropyrimidinase-related protein 4-like isoform X1 [Carassius auratus]
580	2488	XP_026118035.1	0.25	10	6	6		37468000	28302000	13283000	18342000	21127000	25839000	37727000	12726000	22551000	20710000	27867000	28786000	26607000	19465000	13712000	34240000	25231000	12529000	16513000	15270000	22513000	30009000	9208800	18509000	20002000	24344000	25466000	16556000	15935000	10953000	25621000	25521000	24972000	21139000	20556000	19435000	89979	neurofilament medium polypeptide-like [Carassius auratus]
581	1942	XP_026103406.1	8.45	48	10	10	Carbamidomethylation; Acetylation (Protein N-term)	102010000	113420000	89550000	171100000	162980000	92793000	85102000	78715000	94799000	82797000	87478000	66275000	114420000	117010000	83605000	54033000	68239000	55590000	100010000	85670000	60799000	51440000	54563000	59985000	44345000	53032000	43374000	59235000	58343000	44812000	134550000	101570000	106630000	74150000	56717000	52968000	30803	F-actin-capping protein subunit beta isoform X1 [Carassius auratus]
583	4002	XP_026135935.1	0.7	11	2	2		15549000	20824000	19643000	9748100	10872000	14020000	16680000	15718000	14543000	12384000	13914000	14182000	16338000	11377000	14418000	15549000	20824000	19643000	9748100	10872000	14020000	16680000	15718000	14543000	12384000	13914000	14182000	16338000	11377000	14418000	15327000	14669000	14046000	15327000	14669000	14046000	36633	heterogeneous nuclear ribonucleoprotein A/B-like isoform X2 [Carassius auratus]
584	1243	XP_026065603.1	3.35	3	1	1		313820	705340	75743	129550	1432100	851620	1563000	268730	1492900	477070	662760	987220	2861500	87530	0	313820	705340	75743	129550	1432100	851620	1563000	268730	1492900	477070	662760	987220	2861500	87530	0	531320	930670	1149700	531320	930670	1149700	47034	synaptotagmin-1-like isoform X2 [Carassius auratus]
585	579	XP_026077393.1	2.4	3	5	5	Carbamidomethylation	5374300	2775300	3317800	4092700	4391600	6733500	7463000	5546000	3638200	2173500	7038800	6088500	9815300	2005900	2554400	5374300	2775300	2758200	3012300	2484700	6733500	4630300	5037700	3638200	1979500	5137700	5202300	5652000	2005900	2554400	5357200	6107600	7154200	4174900	4564000	4569700	309773	inositol 1 4 5-trisphosphate receptor type 1 isoform X9 [Carassius auratus]
586	2421	XP_026063036.1	7.99	16	3	3	Carbamidomethylation; Acetylation (Protein N-term)	11555000	12352000	9436200	18121000	16647000	9554600	10448000	7056800	12692000	6767100	11787000	9450500	13664000	13908000	7467600	11555000	12352000	9436200	18121000	16647000	9554600	10448000	7056800	12692000	6767100	11787000	9450500	13664000	13908000	7467600	13622000	9836500	11803000	13622000	9836500	11803000	37361	serine/threonine-protein phosphatase alpha-2 isoform-like [Carassius auratus]
587	4423	XP_026130954.1	3.81	24	2	2	Carbamidomethylation	49614000	34539000	27458000	68294000	49425000	46672000	59341000	43838000	53989000	11529000	55681000	52425000	58148000	60579000	40412000	49614000	34539000	27458000	68294000	49425000	46672000	59341000	43838000	53989000	11529000	55681000	52425000	58148000	60579000	40412000	52078000	43873000	58615000	52078000	43873000	58615000	19799	protein/nucleic acid deglycase DJ-1 [Carassius auratus]
588	2644	XP_026054041.1	2.03	14	4	4	Carbamidomethylation	21833000	12244000	14264000	18046000	23041000	17710000	15141000	11543000	18120000	15059000	15654000	17572000	19036000	15577000	12945000	15304000	12244000	7873800	15590000	20534000	13182000	14662000	9562500	15691000	7620900	12799000	13352000	19036000	7548600	4435200	18909000	15606000	17512000	14438000	12235000	11609000	42069	guanine nucleotide-binding protein G(q) subunit alpha-like isoform X2 [Carassius auratus]
589	1954	XP_026066132.1	5.07	18	7	7	Carbamidomethylation	67490000	46709000	24838000	29413000	50507000	63373000	68439000	19016000	61072000	40997000	58405000	77017000	63740000	42195000	36092000	56663000	33308000	18488000	15334000	31374000	52622000	54699000	9315700	46179000	34594000	44393000	59767000	46200000	36378000	32311000	44131000	51502000	56133000	31033000	39482000	43810000	57944	synapsin-2-like [Carassius auratus]
590	3174	XP_026131149.1	2.56	15	2	2	Carbamidomethylation	1682600	1670000	810490	1060700	2093100	1799000	1650500	834360	1706600	578560	1735200	1921500	3560200	982020	1299400	1682600	1670000	810490	1060700	2093100	1799000	1650500	834360	1706600	578560	1735200	1921500	3560200	982020	1299400	1545000	1417100	1899700	1545000	1417100	1899700	23523	ras-related protein rab7-like [Carassius auratus]
591	1173	XP_026071059.1	6.45	13	10	10	Carbamidomethylation	17614000	15096000	5206300	22831000	11925000	19927000	23481000	11791000	19220000	10643000	27626000	20129000	57913000	10910000	10512000	11142000	3972700	2463000	16524000	4210100	13776000	12971000	7083100	9342400	3694800	17115000	16481000	35500000	7525400	7798600	21387000	21684000	31947000	13027000	13321000	18374000	132882	tubulin-specific chaperone D isoform X1 [Carassius auratus]
593	1508	XP_026093328.1	4.37	4	1	1		2948100	0	1505500	7212400	1312400	3538400	4792000	4372700	5886800	0	4139800	4573300	7610600	1683100	2078700	2948100	0	1505500	7212400	1312400	3538400	4792000	4372700	5886800	0	4139800	4573300	7610600	1683100	2078700	3244600	4647500	4017100	3244600	4647500	4017100	65488	glutamate decarboxylase 2-like [Carassius auratus]
594	2428	XP_026114603.1	3.47	8	2	2	Carbamidomethylation	2006100	4283600	4113800	11765000	7387800	2364700	3020900	3549500	4442900	4990800	2896600	2469000	5287700	9355600	6717600	2006100	4283600	3263600	10043000	7387800	2364700	3020900	3549500	4442900	3462200	2896600	2469000	5287700	6770900	4669300	6683100	4896600	6735200	5396800	3368100	4418700	40732	protein NDRG3-like isoform X1 [Carassius auratus]
596	1512	XP_026087578.1	1.32	3	1	1		1076000	1655000	0	1327400	5890100	2329000	7807800	2523700	827020	0	5811300	933280	11042000	0	0	1076000	1655000	0	1327400	5890100	2329000	7807800	2523700	827020	0	5811300	933280	11042000	0	0	2487100	3371900	5929000	2487100	3371900	5929000	46914	synaptotagmin-1-like isoform X2 [Carassius auratus]
597	716	XP_026132381.1	3.38	1	1	1	Carbamidomethylation	0	1938200	916350	534430	0	1912700	2382400	837180	1993600	1826100	1583600	1881000	2266500	1087500	377620	0	1938200	916350	534430	0	1912700	2382400	837180	1993600	1826100	1583600	1881000	2266500	1087500	377620	1129600	1790400	1439300	1129600	1790400	1439300	274668	fatty acid synthase-like [Carassius auratus]
598	4224	XP_026062325.1	1.42	9	1	1		1831800	745520	882280	1539600	2134300	1065800	1359000	1079500	1659300	393510	1150300	2402100	1836900	868890	669150	1831800	745520	882280	1539600	2134300	1065800	1359000	1079500	1659300	393510	1150300	2402100	1836900	868890	669150	1426700	1111400	1385500	1426700	1111400	1385500	32162	carbonic anhydrase-related protein-like [Carassius auratus]
599	977	XP_026081819.1	6.77	18	6	6	Carbamidomethylation	30847000	30877000	25160000	21205000	28035000	36931000	32576000	29124000	23114000	20168000	29081000	36052000	31844000	32271000	23084000	23116000	20846000	20650000	20242000	15722000	29683000	23966000	25124000	18167000	16086000	25993000	29086000	21489000	26397000	19695000	31800000	31008000	33256000	23845000	24293000	26136000	64837	putative adenosylhomocysteinase 3 [Carassius auratus]
600	1966	XP_026075470.1	10.77	13	3	3	Carbamidomethylation	42282000	24407000	23078000	19584000	24755000	31808000	25092000	20259000	28753000	33496000	35650000	34101000	28776000	36918000	37654000	42282000	24407000	23078000	19584000	24755000	31808000	25092000	20259000	28753000	33496000	35650000	34101000	28776000	36918000	37654000	26821000	29924000	35788000	26821000	29924000	35788000	57630	serine/threonine-protein phosphatase 2B catalytic subunit gamma isoform-like isoform X2 [Carassius auratus]
601	1749	XP_026063961.1	9.13	22	5	5		51887000	34140000	26339000	26612000	40631000	45932000	52339000	25376000	52553000	42686000	48145000	55054000	66423000	49545000	41431000	50436000	29594000	25708000	19766000	40017000	45932000	47107000	22573000	50852000	40463000	45168000	52995000	59717000	46514000	39242000	42059000	46541000	52968000	37363000	42554000	48727000	55801	4-aminobutyrate aminotransferase mitochondrial-like [Carassius auratus]
602	3326	XP_026136148.1	7.78	5	2	2	Carbamidomethylation	19461000	15915000	12964000	11837000	13235000	18523000	22702000	4696000	19622000	20655000	18978000	22146000	15620000	17654000	17667000	19461000	15915000	12964000	11837000	13235000	18523000	22702000	4696000	19622000	20655000	18978000	22146000	15620000	17654000	17667000	14978000	17239000	18687000	14978000	17239000	18687000	82959	choline transporter-like protein 1 isoform X3 [Carassius auratus]
603	2208	XP_026089907.1	5.46	3	1	1		6884400	3748300	2602700	1837800	1866800	4757600	4569900	1806600	3118900	3287400	5297900	4312800	5351300	2838700	4953200	6884400	3748300	2602700	1837800	1866800	4757600	4569900	1806600	3118900	3287400	5297900	4312800	5351300	2838700	4953200	3388000	3508100	4550800	3388000	3508100	4550800	35767	aldose reductase-like [Carassius auratus]
604	1223	XP_026145250.1	1.21	17	5	5		11490000	10173000	7570000	7236500	11576000	15058000	12913000	6643900	10325000	10687000	12251000	13074000	11649000	6926300	9513900	10965000	8681500	7151000	7132600	10845000	14577000	11302000	6230400	9597100	10226000	11842000	12448000	8030300	6579300	9341400	10495000	11379000	11223000	9533300	10387000	9648200	47243	flotillin-1-like [Carassius auratus]
605	2043	XP_026073005.1	1.53	22	5	5		25514000	48008000	11962000	49601000	57128000	23421000	38725000	28992000	39047000	22509000	37046000	29989000	49793000	42796000	24411000	24602000	46976000	11192000	45969000	56271000	22736000	38028000	28128000	37899000	20748000	36334000	28784000	48336000	38507000	22183000	42776000	35061000	37532000	40759000	33561000	35219000	36477	voltage-dependent anion-selective channel protein 2-like isoform X1 [Carassius auratus]
606	4228	XP_026082655.1	1.28	33	5	5	Carbamidomethylation; Acetylation (Protein N-term)	111300000	55519000	72688000	57747000	72856000	99915000	86966000	84776000	71723000	54916000	88683000	83389000	53288000	71610000	84350000	103900000	55363000	70451000	56591000	70921000	99826000	86568000	84590000	70946000	51178000	86792000	82009000	52254000	56512000	69567000	79784000	84283000	80891000	77011000	82554000	72076000	22900	40S ribosomal protein S5 [Carassius auratus]
607	1762	XP_026099922.1	1.37	5	4	4	Carbamidomethylation	1441300	3988800	2167200	7037900	5806900	1616800	3741200	2458600	6038900	1816500	3428900	4985500	3342300	4854300	2114800	1441300	3988800	1546900	5421000	4400300	1504300	3362000	1772700	4296700	1156500	3126900	4856300	2537500	2183200	1217200	4896000	3914500	4363500	3681400	3198500	3402500	122957	solute carrier family 12 member 5-like isoform X2 [Carassius auratus]
608	3935	XP_026118255.1	4.5	9	4	4		96121000	81865000	57214000	34584000	96847000	127970000	112710000	121100000	73559000	73975000	107830000	108640000	75517000	76050000	57157000	66161000	32713000	36404000	16412000	58593000	81922000	57745000	65173000	39431000	51664000	63999000	66119000	24593000	59033000	39168000	75092000	103420000	87320000	43823000	60742000	52865000	50181	glutamate receptor U1-like [Carassius auratus]
609	4422	XP_026077508.1	4.94	14	1	1		19723000	14867000	11971000	74416000	7510900	23208000	34294000	29612000	35448000	13936000	35847000	34006000	42240000	19937000	38895000	19723000	14867000	11971000	74416000	7510900	23208000	34294000	29612000	35448000	13936000	35847000	34006000	42240000	19937000	38895000	28977000	28131000	34185000	28977000	28131000	34185000	19813	protein/nucleic acid deglycase DJ-1-like [Carassius auratus]
610	2865	XP_026140374.1	4.14	19	6	6	Carbamidomethylation	65731000	62708000	54869000	89638000	103910000	44125000	44943000	48507000	88650000	72324000	65503000	68432000	63688000	91220000	71299000	42318000	48503000	34046000	67235000	79472000	21982000	23905000	37223000	61477000	48036000	44093000	42631000	46883000	62089000	46424000	81982000	70162000	74518000	58244000	47510000	48424000	76601	uncharacterized protein LOC113116427 [Carassius auratus]
611	3181	XP_026125837.1	5.79	47	6	6	Carbamidomethylation	125330000	165350000	111460000	173060000	244400000	88737000	153920000	88457000	128850000	134460000	86998000	90976000	212240000	162350000	163750000	124550000	162320000	108200000	168230000	241110000	86308000	150620000	87957000	124310000	122830000	84614000	88632000	209090000	126940000	143540000	165960000	123610000	152040000	160880000	114410000	130560000	24271	ubiquitin carboxyl-terminal hydrolase isozyme L1-like [Carassius auratus]
612	2302	XP_026057932.1	3.52	18	5	5		21721000	14261000	11633000	7694400	23051000	18861000	21426000	19027000	22822000	15546000	15983000	20162000	49410000	18284000	17791000	14162000	10098000	6566500	5448700	20079000	13462000	14691000	15998000	16865000	10740000	10282000	14007000	41903000	11659000	12368000	16182000	19537000	31115000	11780000	14351000	24105000	56118	4-aminobutyrate aminotransferase mitochondrial [Carassius auratus]
613	3142	XP_026066411.1	9.87	10	2	2	Carbamidomethylation	20205000	9953200	854020	6444500	10009000	9376000	16632000	548670	18235000	4221900	17907000	15257000	21715000	24066000	23099000	20205000	9953200	854020	6444500	10009000	9376000	16632000	548670	18235000	4221900	17907000	15257000	21715000	24066000	23099000	11791000	9911800	20409000	11791000	9911800	20409000	44584	pyruvate dehydrogenase E1 component subunit alpha mitochondrial-like isoform X1 [Carassius auratus]
614	1865	XP_026124821.1	1.89	22	7	7		28865000	21440000	21224000	13187000	24542000	24478000	30558000	23242000	20830000	22147000	24821000	23918000	33078000	17249000	19752000	26154000	15240000	17104000	8883400	17082000	19545000	20862000	14826000	17646000	18053000	21666000	21160000	25359000	14734000	16154000	22477000	25286000	24224000	16893000	18186000	19815000	44194	endophilin-B2-like isoform X3 [Carassius auratus]
615	2557	XP_026085603.1	6.92	17	2	2		57450000	5088800	47322000	163590000	61068000	52993000	48959000	63148000	72957000	46362000	59678000	64233000	69076000	77213000	118170000	57450000	5088800	47322000	163590000	61068000	52993000	48959000	63148000	72957000	46362000	59678000	64233000	69076000	77213000	118170000	82491000	56884000	77675000	82491000	56884000	77675000	35486	aldose reductase-like [Carassius auratus]
616	1527	XP_026145174.1	0.43	20	9	9	Carbamidomethylation	47679000	31728000	25152000	26475000	40274000	43136000	30578000	46009000	29989000	21530000	31207000	27638000	39290000	22383000	20687000	30714000	19695000	19757000	14505000	21905000	27981000	20883000	29299000	19283000	16123000	22814000	24594000	20759000	17128000	20205000	35164000	34875000	32135000	21315000	22714000	21100000	70047	heterogeneous nuclear ribonucleoprotein R-like [Carassius auratus]
617	2405	XP_026134283.1	9.91	17	3	3	Carbamidomethylation	5923400	3948700	4892300	4900900	5038200	6306900	3209100	2872100	9653500	6631800	8622700	8836800	14048000	5923200	5349300	5923400	3948700	4892300	4900900	5038200	6306900	3209100	2872100	9653500	6631800	8622700	8836800	14048000	5923200	5349300	5267900	5734700	8556000	5267900	5734700	8556000	31207	enoyl-CoA hydratase mitochondrial-like [Carassius auratus]
618	2486	XP_026077970.1	2.52	41	8	8	Carbamidomethylation	47383000	52930000	30338000	72865000	70972000	44105000	64990000	33291000	60326000	59846000	55170000	58204000	79225000	68938000	46677000	29290000	33076000	19653000	38371000	43239000	32737000	35676000	23401000	41074000	35317000	33833000	33887000	52385000	42211000	29715000	55567000	55991000	61643000	32726000	33641000	38406000	30243	voltage-dependent anion-selective channel protein 2-like [Carassius auratus]
619	2190	XP_026076627.1	2.22	15	6	6	Carbamidomethylation	23971000	18949000	11110000	21741000	30292000	19594000	18538000	11605000	20474000	13000000	17333000	14960000	20742000	18628000	12563000	19557000	12249000	8314900	15040000	19670000	15171000	12348000	7155800	14365000	11313000	11087000	9605800	12719000	16270000	10191000	21212000	17142000	16845000	14966000	12070000	11975000	70334	dolichyl-diphosphooligosaccharide--protein glycosyltransferase subunit 2-like isoform X1 [Carassius auratus]
620	1437	XP_026127249.1	1.33	3	3	3		17079000	28253000	10166000	46464000	36817000	18121000	17481000	17099000	24487000	19508000	19012000	14766000	22873000	22524000	18614000	17079000	28253000	10166000	46464000	36817000	18121000	17481000	17099000	24487000	19508000	19012000	14766000	22873000	22524000	18614000	30696000	19339000	19558000	30696000	19339000	19558000	180924	microtubule-associated protein 2-like isoform X5 [Carassius auratus]
621	2323	XP_026110896.1	0.02	15	4	4	Carbamidomethylation	54831000	47890000	29426000	29279000	50509000	50713000	54105000	25623000	44333000	31106000	49511000	50783000	74860000	23932000	20105000	53591000	43841000	28982000	26146000	43958000	50713000	50729000	22725000	41212000	31106000	47558000	49839000	60359000	23681000	20105000	42387000	42428000	44721000	39304000	39297000	40309000	40472	phosphoserine aminotransferase-like [Carassius auratus]
622	2164	XP_026061477.1	2.1	9	3	3		8240700	6298700	6440600	12632000	13155000	7490100	8264300	9137600	7216800	5040400	10364000	5347100	10136000	7198600	6348400	8240700	6298700	6440600	12632000	13155000	7490100	8264300	9137600	7216800	5040400	10364000	5347100	10136000	7198600	6348400	9754700	7674700	8681500	9754700	7674700	8681500	55106	vimentin A2-like isoform X2 [Carassius auratus]
623	3718	XP_026059337.1	2.71	11	2	2		47556000	40435000	46137000	21849000	42450000	38425000	49921000	18925000	33064000	1688000	36115000	35652000	42601000	30377000	41780000	45148000	36361000	44930000	21033000	42001000	36542000	46815000	15093000	32768000	1443800	34370000	34439000	42601000	30377000	41492000	39686000	28405000	37738000	37895000	26532000	36656000	21871	peroxiredoxin-1-like [Carassius auratus]
624	934	XP_026092201.1	1.34	1	1	1	Carbamidomethylation	3373200	1877500	680450	2740500	1223900	1721800	2939200	1477000	2626000	2524600	2023700	702360	2805600	4168200	1418800	3373200	1877500	680450	2740500	1223900	1721800	2939200	1477000	2626000	2524600	2023700	702360	2805600	4168200	1418800	1979100	2257700	2223700	1979100	2257700	2223700	107506	26S proteasome non-ATPase regulatory subunit 1 [Carassius auratus]
625	4420	XP_026093198.1	6.62	70	6	6	Carbamidomethylation; Oxidation (M)	176010000	196810000	141550000	180100000	204460000	122290000	189510000	117290000	186690000	92475000	177690000	124990000	184000000	91469000	109010000	132500000	165890000	110130000	136940000	160300000	102690000	158730000	111920000	142130000	63226000	144800000	98824000	151860000	63922000	71117000	182480000	147990000	139140000	141540000	115740000	106440000	15247	profilin-1-like [Carassius auratus]
626	2066	XP_026055919.1	38.05	8	2	2		848860	7130500	2798700	1464800	4969800	808300	979520	523070	745920	1477500	5117300	5913100	6857900	0	0	848860	7130500	2798700	1464800	4969800	808300	979520	523070	745920	1477500	5117300	5913100	6857900	0	0	5324300	1732500	5962700	5324300	1732500	5962700	58786	serine--tRNA ligase cytoplasmic-like [Carassius auratus]
627	1431	XP_026092125.1	1.88	7	8	8		20823000	16447000	12068000	8205600	15181000	20111000	21783000	17190000	13912000	7775400	21647000	19832000	25215000	9049000	11908000	15883000	10307000	10846000	4344800	8039100	16383000	15598000	14849000	8226300	6868900	15026000	12915000	13412000	7286600	10420000	15709000	17714000	18456000	10270000	12385000	11812000	192924	complement C3-like [Carassius auratus]
628	2348	XP_026063303.1	4.83	39	9	9	Carbamidomethylation	118990000	104800000	52276000	148650000	159390000	76255000	101950000	56290000	114490000	64007000	91421000	86109000	130440000	123040000	80514000	75621000	56494000	27266000	71582000	98609000	42472000	68623000	25370000	75509000	39319000	60769000	70865000	82776000	74191000	51386000	118970000	85387000	103220000	68060000	53048000	67997000	30144	40S ribosomal protein S2 [Carassius auratus]
629	1430	XP_026116100.1	4.37	18	6	6	Acetylation (Protein N-term)	42613000	62511000	20996000	72822000	67305000	36431000	40958000	29306000	47158000	23506000	40892000	32745000	56702000	34904000	21390000	32598000	50567000	19178000	49680000	53206000	29148000	32993000	22354000	40603000	14793000	34428000	29797000	45901000	21204000	12665000	57741000	36193000	40347000	41046000	27978000	28799000	43620	sarcolemmal membrane-associated protein-like isoform X2 [Carassius auratus]
630	1858	XP_026143929.1	2.81	6	4	4		8647300	6699900	11168000	10079000	7071800	6541200	5178000	8439700	8335200	8054000	7900000	8163900	7368500	6600300	7366400	8583300	6536900	11109000	9777200	6690600	6457000	4974100	8243000	8172500	8054000	7900000	8074200	7158200	6600300	7334800	8733300	7342000	7524000	8539300	7180100	7413500	120426	DNA damage-binding protein 1 isoform X2 [Carassius auratus]
631	2152	XP_026126146.1	0.29	6	1	1		1721900	10789000	9711700	13571000	9058200	3802100	8025500	16375000	12334000	6282700	6663100	13026000	6396900	7254700	11767000	1721900	10789000	9711700	13571000	9058200	3802100	8025500	16375000	12334000	6282700	6663100	13026000	6396900	7254700	11767000	8970300	9363900	9021400	8970300	9363900	9021400	57325	succinyl-CoA:3-ketoacid coenzyme A transferase 1 mitochondrial-like isoform X2 [Carassius auratus]
632	2006	XP_026064545.1	6.97	5	2	2		2849900	3164900	1305800	3254500	3291000	1750800	1493000	1987000	2848800	1368500	1612400	263730	2536000	1918800	1334800	2849900	3164900	1305800	3254500	3291000	1750800	1493000	1987000	2848800	1368500	1612400	263730	2536000	1918800	1334800	2981300	2237100	1847300	2981300	2237100	1847300	44043	mitogen-activated protein kinase 1-like [Carassius auratus]
634	3020	XP_026136522.1	7.12	46	8	8	Carbamidomethylation	133410000	108590000	79091000	71727000	90619000	137740000	108140000	73200000	151160000	89806000	102610000	126050000	135770000	110060000	108280000	104790000	76740000	60664000	43185000	61337000	104010000	78786000	47124000	109270000	79738000	94467000	88377000	94138000	81113000	97918000	102580000	120240000	128760000	69343000	83786000	91203000	40089	alcohol dehydrogenase class-3 [Carassius auratus]
635	2562	XP_026136426.1	1.7	5	1	1		1210100	1859900	666020	1208300	1885400	2293500	3002300	1356800	2548900	635420	2374600	2757800	4004100	709060	622680	1210100	1859900	666020	1208300	1885400	2293500	3002300	1356800	2548900	635420	2374600	2757800	4004100	709060	622680	1366000	1967400	2093700	1366000	1967400	2093700	42062	guanine nucleotide-binding protein G(q) subunit alpha-like [Carassius auratus]
636	3188	XP_026098579.1	1.67	7	1	1		478150	3811100	1469500	2360700	4146000	2540700	3300500	3504100	3216400	909470	2406400	1978400	5428300	634560	565390	478150	3811100	1469500	2360700	4146000	2540700	3300500	3504100	3216400	909470	2406400	1978400	5428300	634560	565390	2453100	2694200	2202600	2453100	2694200	2202600	17292	ubiquitin-conjugating enzyme E2 N isoform X1 [Carassius auratus]
637	2341	XP_026087947.1	11.75	27	6	6	Acetylation (Protein N-term)	118360000	118560000	79099000	170210000	153890000	92899000	77365000	69726000	97918000	77168000	99702000	71963000	97389000	130920000	95024000	96852000	97515000	64712000	132950000	124550000	77295000	61739000	53557000	79808000	66176000	81759000	61979000	80621000	115330000	85258000	131580000	83441000	103700000	106310000	67715000	88624000	28679	tropomyosin alpha-4 chain-like isoform X8 [Carassius auratus]
638	2877	XP_026098504.1	7.46	54	9	9	Carbamidomethylation	169680000	182990000	118230000	181150000	206130000	166790000	145010000	160780000	162470000	102090000	166160000	143040000	200740000	105130000	93307000	132250000	147560000	101360000	119600000	131260000	120710000	112440000	119790000	109060000	79175000	123110000	102020000	122350000	89992000	81990000	177990000	150510000	152170000	126410000	108240000	103890000	24446	GTP-binding nuclear protein Ran [Carassius auratus]
639	3198	XP_026092623.1	0.05	34	5	5	Carbamidomethylation; Acetylation (Protein N-term)	39934000	43466000	37844000	60898000	30522000	37850000	33313000	43185000	48289000	38894000	44822000	32030000	57860000	34370000	48780000	37348000	38241000	31630000	45080000	30522000	35531000	33313000	34425000	38238000	37583000	37780000	26837000	51707000	28643000	39228000	48870000	44426000	44599000	36564000	35818000	36839000	16910	myosin light polypeptide 6 isoform X3 [Carassius auratus]
640	1683	XP_026115262.1	1.15	4	1	1		3890300	2009200	2354400	1881200	1774200	3076700	2726500	967340	3111300	2654700	4223700	4066900	1223100	2749500	2881000	3890300	2009200	2354400	1881200	1774200	3076700	2726500	967340	3111300	2654700	4223700	4066900	1223100	2749500	2881000	2381900	2507300	3028900	2381900	2507300	3028900	61529	S-adenosylhomocysteine hydrolase-like protein 1 isoform X1 [Carassius auratus]
641	2673	XP_026057357.1	2.29	7	2	2	Carbamidomethylation	15069000	7983800	11166000	11604000	14657000	12590000	10772000	8259900	15815000	16591000	11045000	11751000	14610000	24710000	14006000	12651000	7281800	9412800	10134000	12305000	11018000	9159000	7216700	13450000	13367000	9290100	10001000	13318000	20511000	11000000	12096000	12806000	15224000	10357000	10842000	12824000	32644	microtubule-associated protein RP/EB family member 2-like isoform X2 [Carassius auratus]
642	2154	XP_026144272.1	15.63	3	1	1		2511400	2905600	1531100	3516500	3570200	891390	1190300	1337700	1249500	2017600	1249000	852460	2031500	3755700	2385400	2511400	2905600	1531100	3516500	3570200	891390	1190300	1337700	1249500	2017600	1249000	852460	2031500	3755700	2385400	2807000	1337300	2054800	2807000	1337300	2054800	50317	septin-7 isoform X3 [Carassius auratus]
643	2211	XP_026086359.1	10.13	6	1	1		4295100	5467700	3669300	9490900	8165300	3843000	3341300	4614000	3732400	2776400	3264800	4302300	3445000	3827300	1929800	4295100	5467700	3669300	9490900	8165300	3843000	3341300	4614000	3732400	2776400	3264800	4302300	3445000	3827300	1929800	6217600	3661400	3353800	6217600	3661400	3353800	42595	60S ribosomal protein L4-B-like [Carassius auratus]
644	1973	XP_026081740.1	2.12	27	7	7		90963000	71104000	61052000	68880000	66563000	68544000	75325000	54780000	74962000	53185000	68404000	69563000	92132000	80061000	65102000	87021000	64112000	53758000	53915000	58064000	63288000	67211000	47101000	65237000	41346000	61874000	65485000	85334000	61247000	49565000	73472000	66952000	77184000	63374000	56837000	65547000	25958	V-type proton ATPase subunit E 1-like [Carassius auratus]
645	2191	XP_026094415.1	3.78	4	1	1		2052500	2789000	2035600	6393600	5542200	1982900	1249200	3271000	2835900	2162500	1884600	928960	3222800	4356100	2646900	2052500	2789000	2035600	6393600	5542200	1982900	1249200	3271000	2835900	2162500	1884600	928960	3222800	4356100	2646900	3762600	2300300	2607900	3762600	2300300	2607900	59562	catalase-like [Carassius auratus]
646	3408	XP_026093330.1	1.56	20	3	3	Carbamidomethylation	32479000	27922000	8237600	17652000	15983000	28799000	31785000	21263000	23199000	15915000	26636000	26794000	41950000	10866000	16018000	32479000	27922000	8237600	17652000	15983000	28799000	31785000	21263000	23199000	15915000	26636000	26794000	41950000	10866000	16018000	20758000	26018000	29624000	20758000	26018000	29624000	35272	annexin A13-like [Carassius auratus]
647	4451	XP_026102072.1	2.48	12	2	2	Carbamidomethylation	6177300	1294000	2244300	4019600	22150000	2063900	7075600	3318000	16700000	6047100	7169300	7735300	22260000	8917500	3083100	6177300	1294000	2244300	4019600	22150000	2063900	7075600	3318000	16700000	6047100	7169300	7735300	22260000	8917500	3083100	9408000	9242400	11480000	9408000	9242400	11480000	23623	high mobility group-T protein-like [Carassius auratus]
648	1928	XP_026055828.1	5.92	18	5	5	Carbamidomethylation; Oxidation (M)	17453000	27567000	15817000	41534000	35288000	16560000	30232000	16485000	21366000	14641000	24929000	27371000	36373000	27308000	15270000	16886000	23853000	14911000	41534000	30698000	14825000	27063000	14713000	18418000	14595000	23122000	25526000	30238000	26585000	14396000	32621000	26375000	31302000	28984000	24058000	28745000	53267	6-phosphogluconate dehydrogenase decarboxylating-like [Carassius auratus]
649	2626	XP_026118925.1	2.03	12	3	3	Carbamidomethylation	6262200	5506500	3293500	5538400	7113600	6330200	7431800	4332500	10818000	7378000	7850400	9794800	12475000	6385100	7582200	3872300	5506500	3293500	5472100	5590400	3896700	5412500	3901700	7687800	4627200	5314400	6209800	11248000	3665600	4855500	6073400	7258100	8817500	4747000	5105200	6258600	40684	neuronal-specific septin-3 isoform X2 [Carassius auratus]
650	1855	XP_026134620.1	1.94	21	5	5	Carbamidomethylation; Acetylation (Protein N-term)	13620000	23744000	18628000	22812000	11810000	16657000	18770000	14932000	17257000	13209000	15993000	17213000	24952000	5534000	9094800	11402000	20208000	16490000	21588000	9862600	14885000	16943000	13748000	15330000	11004000	14652000	16988000	20793000	3755100	6638800	21564000	16858000	15404000	19200000	14382000	12566000	44866	neurofilament light polypeptide-like [Carassius auratus]
651	5120	XP_026141319.1	0.51	14	2	2		7726500	6899000	4173700	7388100	9801300	5502300	7942500	4965900	7195700	7048000	5915800	7339100	10536000	5671200	3858100	7726500	6899000	4173700	7388100	9801300	5502300	7942500	4965900	7195700	7048000	5915800	7339100	10536000	5671200	3858100	7197700	6530900	6664000	7197700	6530900	6664000	23042	ras-related protein Ral-A-like [Carassius auratus]
652	2454	XP_026102419.1	2.2	30	7	7	Carbamidomethylation	45660000	44443000	23646000	42489000	56517000	42407000	36901000	26422000	43220000	28820000	40031000	27714000	47412000	32705000	30701000	31121000	33632000	20275000	27159000	38468000	31351000	29913000	19360000	31703000	19758000	30618000	17823000	38847000	22848000	18919000	44282000	36974000	40875000	30131000	26417000	28502000	46437	saccharopine dehydrogenase-like oxidoreductase [Carassius auratus]
653	1628	XP_026139140.1	2.66	13	4	4	Carbamidomethylation	13242000	10068000	10671000	15475000	19268000	13650000	9159100	8314100	11600000	14608000	11442000	11535000	8284500	20099000	13539000	12680000	10068000	10182000	15475000	19130000	13276000	9025100	8314100	11451000	13216000	11442000	11266000	8284500	17599000	10755000	13904000	11569000	15017000	13507000	11057000	13166000	47507	V-type proton ATPase subunit C 1-A-like isoform X2 [Carassius auratus]
654	1815	XP_026103582.1	2.02	8	4	4		5143400	4602800	6265100	4152100	1855600	4776500	3941400	4758000	3941100	3688400	5491900	5650500	7141700	171880	966390	5143400	4287000	6265100	4152100	1720200	4776500	3612300	4716000	3664400	3688400	5375700	5466900	5660500	171880	966390	4539200	4512600	5936100	4313500	4296700	5342400	82139	trifunctional enzyme subunit alpha mitochondrial-like [Carassius auratus]
655	2953	XP_026053557.1	5.72	33	11	11	Carbamidomethylation	100470000	77697000	67595000	60637000	85407000	45583000	69198000	43302000	87940000	39279000	46741000	74375000	105100000	61980000	57880000	59356000	49936000	41479000	38973000	60810000	33214000	42912000	25046000	58352000	26292000	32503000	52324000	59968000	42473000	38736000	85321000	58228000	77716000	50111000	37163000	47715000	33335	uncharacterized protein LOC113039727 [Carassius auratus]
656	2156	XP_026057639.1	7.26	25	5	5	Carbamidomethylation	32961000	23133000	22563000	17840000	20203000	29734000	18386000	18394000	22647000	27202000	27706000	28604000	30381000	25368000	26241000	27769000	18134000	18595000	11322000	15488000	25194000	13390000	17150000	19123000	23163000	23161000	23834000	23139000	20764000	22510000	23575000	25259000	27660000	18497000	21248000	22682000	45989	mannose-6-phosphate isomerase-like isoform X1 [Carassius auratus]
657	1785	XP_026083884.1	1.45	19	2	2	Carbamidomethylation	15905000	1553900	6575700	3517200	11462000	0	5468500	4397300	4339900	12369000	14623000	0	5674300	7456600	5892700	15905000	1553900	6575700	3517200	11462000	0	5468500	4397300	4339900	12369000	14623000	0	5674300	7456600	5892700	13408000	8896900	13974000	13408000	8896900	13974000	47436	26S proteasome regulatory subunit 6B [Carassius auratus]
658	2925	XP_026125972.1	2.07	4	1	1		83724	1469500	40198	1891100	1250400	380360	1118300	976440	841590	0	549970	1061600	1755900	0	0	83724	1469500	40198	1891100	1250400	380360	1118300	976440	841590	0	549970	1061600	1755900	0	0	946990	829170	1122500	946990	829170	1122500	40722	guanine nucleotide-binding protein G(k) subunit alpha-like [Carassius auratus]
659	6367	XP_026066469.1	0.44	8	2	2	Carbamidomethylation; Acetylation (Protein N-term)	285240000	288380000	306010000	57431000	105350000	268150000	240910000	250820000	119520000	185340000	278190000	243280000	182120000	97278000	235590000	285240000	288380000	306010000	57431000	105350000	268150000	240910000	250820000	119520000	185340000	278190000	243280000	182120000	97278000	235590000	208480000	212940000	207290000	208480000	212940000	207290000	30901	myelin proteolipid protein-like isoform X1 [Carassius auratus]
660	2260	XP_026094450.1	2.95	3	1	1		4241000	2998100	3306300	6321600	5674100	3229000	4409200	3411100	4008100	3496200	4320000	81208	4263400	6348100	3036400	4241000	2998100	3306300	6321600	5674100	3229000	4409200	3411100	4008100	3496200	4320000	81208	4263400	6348100	3036400	4508200	3710700	3609800	4508200	3710700	3609800	59534	catalase [Carassius auratus]
661	1820	XP_026129335.1	1.76	8	2	2	Carbamidomethylation	6376100	10991000	6348300	12869000	10893000	8949500	11239000	10182000	10525000	4991300	10488000	12532000	13540000	3641200	120980	6376100	10991000	6348300	12869000	10893000	8949500	11239000	10182000	10525000	4991300	10488000	12532000	13540000	3641200	120980	9740600	9363100	9899300	9740600	9363100	9899300	57656	serine/threonine-protein phosphatase 2B catalytic subunit gamma isoform-like isoform X2 [Carassius auratus]
662	1591	XP_026083215.1	3.23	4	2	2	Carbamidomethylation	4916300	2213700	792840	1103400	3614000	6392700	4066500	1150900	3490800	1051400	2926700	1491900	5311700	80673	128810	4916300	2213700	792840	1103400	3614000	6392700	4066500	1150900	3490800	1051400	2926700	1491900	5311700	80673	128810	2528100	3230400	2808800	2528100	3230400	2808800	70130	semaphorin-7A-like [Carassius auratus]
664	4143	XP_026067236.1	7.51	9	1	1		0	0	6486100	0	0	0	0	5499800	51575	5967700	186300	0	4417200	0	0	0	0	6486100	0	0	0	0	5499800	51575	5967700	186300	0	4417200	0	0	6486100	3839700	2301800	6486100	3839700	2301800	21843	peroxiredoxin-1-like [Carassius auratus]
665	920	XP_026066539.1	0.48	28	13	13	Carbamidomethylation	60308000	53472000	25280000	42344000	66257000	54797000	54291000	32065000	46806000	25310000	54569000	43976000	67919000	19467000	41513000	31643000	18529000	14315000	12278000	19356000	27543000	21445000	13836000	22393000	16327000	25332000	25776000	24114000	8556300	27158000	55642000	47311000	51392000	19224000	20309000	22187000	68051	moesin-like [Carassius auratus]
666	2023	XP_026053814.1	9.22	26	11	11	Carbamidomethylation	113260000	72330000	65364000	93205000	110920000	112140000	93609000	76450000	82179000	85458000	100870000	98883000	101520000	117660000	87651000	67235000	39942000	43686000	30466000	48906000	67291000	47682000	44412000	50788000	55041000	58381000	60575000	54619000	67054000	57791000	96870000	90781000	102300000	46047000	53043000	59684000	73442	gamma-adducin-like isoform X2 [Carassius auratus]
667	2340	XP_026144638.1	1.03	16	3	3	Carbamidomethylation	26837000	24632000	25256000	24595000	34990000	28512000	25499000	25331000	38474000	24629000	30500000	27051000	26743000	29506000	28659000	26837000	24632000	25256000	24595000	34990000	28512000	25499000	25331000	38474000	24629000	30500000	27051000	26743000	29506000	28659000	27699000	29060000	28817000	27699000	29060000	28817000	42841	interleukin enhancer-binding factor 2 homolog [Carassius auratus]
668	2423	XP_026075900.1	7.13	7	1	1		5927400	18475000	15454000	10765000	14694000	22036000	25744000	2995400	17871000	25160000	25329000	24621000	12987000	25788000	16643000	5927400	18475000	15454000	10765000	14694000	22036000	25744000	2995400	17871000	25160000	25329000	24621000	12987000	25788000	16643000	13063000	18761000	21073000	13063000	18761000	21073000	45074	acetyl-CoA acetyltransferase mitochondrial-like [Carassius auratus]
669	1627	XP_026093946.1	9.35	2	1	1		3984000	3997900	2488800	0	4578400	2158300	2015500	0	2470200	3357800	3070600	2334700	3008700	7631800	4657300	3984000	3997900	2488800	0	4578400	2158300	2015500	0	2470200	3357800	3070600	2334700	3008700	7631800	4657300	3762300	2500400	4140600	3762300	2500400	4140600	84673	glycine--tRNA ligase-like [Carassius auratus]
670	3012	XP_026058552.1	2.87	13	3	3	Carbamidomethylation	21313000	34937000	21436000	25200000	25861000	24419000	27088000	29805000	28379000	13191000	26014000	32013000	26842000	13524000	5793400	18855000	29226000	20442000	23318000	23230000	21348000	23233000	25657000	25750000	12028000	23410000	28421000	20973000	12783000	4546500	25750000	24576000	23930000	23014000	21603000	21120000	39706	isocitrate dehydrogenase [NAD] subunit alpha mitochondrial-like isoform X2 [Carassius auratus]
671	2245	XP_026117484.1	2.5	2	1	1		2049300	2062000	1595600	1096400	0	2305100	2601400	1419900	2424500	1200200	2936800	3612100	3997500	1441200	1085300	2049300	2062000	1595600	1096400	0	2305100	2601400	1419900	2424500	1200200	2936800	3612100	3997500	1441200	1085300	1700800	1990200	2614600	1700800	1990200	2614600	57244	succinyl-CoA:3-ketoacid coenzyme A transferase 1 mitochondrial-like [Carassius auratus]
672	2785	XP_026107607.1	0.68	29	7	7		63660000	48184000	44149000	84269000	55678000	51559000	50041000	41978000	57232000	55745000	50128000	42980000	61328000	51719000	49421000	44314000	28241000	32209000	63262000	33679000	38831000	33771000	31968000	38535000	37445000	37451000	31005000	43468000	36998000	37327000	59188000	51311000	51906000	40341000	36110000	37250000	48961	RNA-binding protein NOB1-like [Carassius auratus]
673	2086	XP_026143933.1	9.21	52	10	10	Carbamidomethylation; Acetylation (Protein N-term)	158590000	124330000	92016000	107800000	122320000	141040000	123100000	78570000	120200000	115130000	132360000	130890000	135280000	157980000	121580000	117910000	78403000	65327000	58287000	64091000	106970000	91832000	50729000	87431000	83897000	97366000	106190000	90699000	106330000	96237000	124870000	118960000	138280000	78478000	84261000	101140000	37764	transaldolase-like [Carassius auratus]
674	2515	XP_026055003.1	6.62	6	1	1	Acetylation (Protein N-term)	3316800	815280	3740800	2850500	3181100	3558400	2951400	2990100	3232300	3377300	3216800	4214800	2951200	4961200	5014700	3316800	815280	3740800	2850500	3181100	3558400	2951400	2990100	3232300	3377300	3216800	4214800	2951200	4961200	5014700	2780900	3221900	4071700	2780900	3221900	4071700	50510	protein kinase C and casein kinase substrate in neurons protein 1-like [Carassius auratus]
675	2015	XP_026132904.1	5.55	17	4	4	Carbamidomethylation	15054000	17258000	8247900	34830000	31577000	13242000	11205000	13641000	21083000	15044000	15371000	15254000	21610000	22352000	14558000	13090000	17244000	7275400	30130000	27494000	11155000	8968300	11557000	18616000	13886000	13615000	14177000	19387000	20722000	14558000	22218000	14843000	18163000	19871000	12836000	16492000	48242	cytochrome b-c1 complex subunit 2 mitochondrial-like [Carassius auratus]
676	1135	XP_026117511.1	3.33	7	9	9	Carbamidomethylation	14672000	9976200	8125500	4846400	7797400	14213000	12205000	6903700	9111100	7431300	14494000	12976000	15995000	7369800	8903200	9655000	6198300	6348400	2645500	4650300	9098600	7508000	3953300	6840500	5670000	8471400	7300500	6866400	6235600	6845800	10032000	11183000	13217000	5899500	6614100	7143900	244199	U5 small nuclear ribonucleoprotein 200 kDa helicase [Carassius auratus]
677	2575	XP_026056790.1	4.93	5	3	3		5957700	2084600	4679400	1281400	1581300	6881400	5404200	5653300	2445500	4406000	5155800	4952900	4494700	2263300	5004700	4839800	1943100	3891200	1281400	1169400	5313400	4432800	4716300	2169200	3518700	4138800	3670000	3702200	1507200	3730400	3608300	4958100	4374300	2993400	4030100	3349700	46087	phosphatidylinositol 5-phosphate 4-kinase type-2 alpha [Carassius auratus]
678	2664	XP_026094959.1	1.5	12	2	2	Carbamidomethylation	5596700	11314000	8910200	7307900	10891000	9376900	6527300	10679000	17708000	6599400	8165800	13752000	10809000	1806600	6067100	5596700	11314000	8910200	7307900	10891000	9376900	6527300	10679000	17708000	6599400	8165800	13752000	10809000	1806600	6067100	8804100	10178000	9919300	8804100	10178000	9919300	40095	isocitrate dehydrogenase [NAD] subunit alpha mitochondrial [Carassius auratus]
679	3327	XP_026131161.1	0.4	56	9	9	Carbamidomethylation; Acetylation (Protein N-term)	79329000	108290000	54577000	73742000	102380000	65492000	103950000	52019000	113630000	46837000	90627000	90681000	88722000	54812000	44916000	30606000	59020000	30442000	36726000	50443000	24401000	63579000	34641000	67825000	19948000	49465000	50973000	49144000	23913000	20418000	93317000	84984000	87650000	50328000	49500000	48485000	19692	actin-related protein 2/3 complex subunit 4 [Carassius auratus]
680	3454	XP_026066947.1	6.47	4	5	5	Acetylation (Protein N-term)	60229000	74349000	53567000	127230000	113530000	54496000	50047000	54883000	68925000	47912000	58306000	40893000	60558000	79814000	52884000	33100000	42857000	31786000	80337000	69908000	31488000	29909000	34857000	39197000	26161000	33462000	23561000	36218000	44692000	27460000	85781000	55252000	58953000	51598000	32322000	33079000	149869	reticulon-3-like isoform X3 [Carassius auratus]
681	880	XP_026092616.1	4.45	2	6	6	Carbamidomethylation	6269400	7878300	5839800	7433600	10233000	6613300	9878600	5658700	10486000	4355900	6215800	5866600	11305000	4899100	3842300	4414100	6391200	4047400	2696400	5784300	4973200	6337600	3286800	7188100	3031200	4212000	2761000	6120400	1856500	2059100	8542100	7894100	7020400	4961100	5283000	3996500	497106	E3 ubiquitin-protein ligase HUWE1-like isoform X4 [Carassius auratus]
682	2210	XP_026143247.1	9.88	6	1	1		2829900	3175900	2586000	5868200	6265800	2805800	2794000	3350700	2895500	1487400	2354000	2038500	2958200	2218900	1135300	2829900	3175900	2586000	5868200	6265800	2805800	2794000	3350700	2895500	1487400	2354000	2038500	2958200	2218900	1135300	4145200	2666700	2141000	4145200	2666700	2141000	42523	60S ribosomal protein L4-B-like [Carassius auratus]
683	1886	XP_026060786.1	3.91	6	3	3	Carbamidomethylation	5994700	6196400	4760000	4382600	7441000	6203200	5335400	4525900	6868800	6960700	5482200	6217200	7916900	9653600	5992100	5994700	6196400	4760000	4382600	7441000	6203200	5335400	4525900	6868800	6960700	5482200	6217200	7916900	9653600	5992100	6346500	6032700	7098500	6346500	6032700	7098500	111555	receptor-type tyrosine-protein phosphatase N2-like isoform X3 [Carassius auratus]
684	1755	XP_026063771.1	2.8	3	2	2		2036800	1173100	131450	3452300	1563600	2519500	3273100	2288000	2279100	1391800	2526200	872330	2642100	3080900	2082400	2036800	1173100	131450	3452300	1563600	2519500	3273100	2288000	2279100	1391800	2526200	872330	2642100	3080900	2082400	1999300	2500600	2707500	1999300	2500600	2707500	96307	major vault protein-like isoform X2 [Carassius auratus]
685	2457	XP_026121904.1	2.01	5	1	1		4932700	201130	7351600	2194100	86073	4534800	0	1786900	1045500	10424000	2521800	3577100	76537	12294000	14739000	4932700	201130	7351600	2194100	86073	4534800	0	1786900	1045500	10424000	2521800	3577100	76537	12294000	14739000	2953100	4447700	6641700	2953100	4447700	6641700	48617	synaptotagmin-2-like isoform X2 [Carassius auratus]
686	2303	XP_026146711.1	2.33	8	1	1	Carbamidomethylation	17220000	24274000	12321000	10208000	17529000	24547000	30469000	22810000	19983000	9597300	28540000	24573000	28336000	4097900	6676900	17220000	24274000	12321000	10208000	17529000	24547000	30469000	22810000	19983000	9597300	28540000	24573000	28336000	4097900	6676900	16310000	21481000	18445000	16310000	21481000	18445000	22185	visinin-like protein 1 [Carassius auratus]
687	1359	XP_026069381.1	0.4	2	1	1		1505100	2895600	2711700	1382000	1532700	0	1378500	1808000	2302100	3389900	1971900	2853000	2685400	1774500	1399500	1505100	2895600	2711700	1382000	1532700	0	1378500	1808000	2302100	3389900	1971900	2853000	2685400	1774500	1399500	2005400	2219600	2136900	2005400	2219600	2136900	104918	dynamin-like 120 kDa protein mitochondrial isoform X7 [Carassius auratus]
688	1998	XP_026069029.1	7.69	30	8	8		24476000	25274000	13080000	35418000	35642000	15713000	21187000	15014000	14756000	5807200	24521000	12868000	24040000	7731400	10810000	12196000	13311000	7581700	21691000	18453000	8594600	12504000	10644000	9277100	3698200	12254000	7727500	11962000	3836700	8052200	26940000	17082000	19958000	14647000	8943600	9135400	45167	keratin type I cytoskeletal 18-like [Carassius auratus]
689	2158	XP_026135295.1	0.44	7	2	2	Carbamidomethylation	4562600	5607600	309370	1670500	3683000	6303900	2084800	1083900	2461200	233270	0	1477500	5076600	956380	0	4562600	5607600	309370	1670500	3683000	6303900	2084800	1083900	2461200	233270	0	1477500	5076600	956380	0	4289600	6226900	3755200	4289600	6226900	3755200	79854	MICOS complex subunit MIC60-like isoform X2 [Carassius auratus]
690	5335	XP_026094036.1	3.29	14	2	2	Carbamidomethylation	3911500	4282700	2495600	6838100	6371500	2102000	4321600	3416200	5223400	3595000	3169900	4699900	3823800	3524200	1840300	3911500	4282700	2495600	6838100	6371500	2102000	4321600	3416200	5223400	3595000	3169900	4699900	3823800	3524200	1840300	4779900	3731700	3873200	4779900	3731700	3873200	23325	ras-related protein Ral-A [Carassius auratus]
691	2635	XP_026092681.1	8.59	29	7	7	Carbamidomethylation	40351000	30516000	24854000	49104000	43272000	28199000	32821000	20180000	28376000	19787000	26252000	18263000	31578000	34264000	25158000	32555000	21758000	18733000	30630000	30273000	21436000	24857000	13221000	21785000	14857000	18546000	15084000	22375000	26208000	16989000	37766000	26624000	28446000	26790000	19231000	19840000	31506	pyridoxal phosphate homeostasis protein-like [Carassius auratus]
692	4426	XP_026078484.1	6.69	33	3	3		125020000	140150000	90414000	247590000	183250000	101790000	89944000	90376000	138190000	90786000	99721000	82123000	110930000	163380000	98734000	123930000	139510000	89967000	245910000	182370000	100850000	89304000	89946000	137770000	90316000	99226000	81844000	110490000	162440000	98464000	157290000	102220000	110980000	156340000	101640000	110490000	11240	alpha-synuclein-like isoform X2 [Carassius auratus]
693	1772	XP_026147149.1	5.22	3	1	1		1909700	2823200	2392400	6488400	4083300	2106100	2204600	2342000	2559000	1609400	2052500	2526200	0	2666300	1591000	1909700	2823200	2392400	6488400	4083300	2106100	2204600	2342000	2559000	1609400	2052500	2526200	0	2666300	1591000	3539400	2164200	2209000	3539400	2164200	2209000	44226	26S proteasome regulatory subunit 10B [Carassius auratus]
694	1773	XP_026088905.1	12.24	3	1	1		269200	279210	231390	2854500	639440	577260	651860	0	153560	341140	0	887400	1248700	1159100	0	269200	279210	231390	2854500	639440	577260	651860	0	153560	341140	0	887400	1248700	1159100	0	854750	430960	1098400	854750	430960	1098400	44285	26S proteasome regulatory subunit 10B-like [Carassius auratus]
695	2187	XP_026121563.1	0.62	13	3	3		18335000	12608000	6809100	13057000	18715000	14729000	11724000	10693000	12317000	10549000	12495000	11442000	14581000	12086000	8642200	18335000	12608000	6809100	13057000	18715000	14729000	11724000	10693000	12317000	10549000	12495000	11442000	14581000	12086000	8642200	14526000	12002000	12625000	14526000	12002000	12625000	44649	dynactin subunit 2 isoform X1 [Carassius auratus]
696	876	XP_026135621.1	0.54	2	1	1	Acetylation (Protein N-term)	0	275210	615800	448820	946950	1232000	1290500	518100	929580	162820	871650	2200000	285500	207270	390260	0	275210	615800	448820	946950	1232000	1290500	518100	929580	162820	871650	2200000	285500	207270	390260	940480	1073000	1165500	940480	1073000	1165500	115477	UDP-N-acetylglucosamine--peptide N-acetylglucosaminyltransferase 110 kDa subunit-like isoform X4 [Carassius auratus]
697	1664	XP_026063522.1	0.16	32	10	10	Carbamidomethylation	19567000	18288000	12300000	29007000	45356000	21699000	23121000	18191000	28635000	19914000	22107000	17993000	39198000	33959000	17746000	8101000	8599900	6146100	17402000	26967000	11154000	12798000	8463900	17287000	7123600	13205000	13313000	23340000	9866300	5253500	28132000	28445000	33857000	13443000	11365000	12996000	47436	venom prothrombin activator porpharin-D-like [Carassius auratus]
698	3496	XP_026086006.1	7.12	36	5	5	Carbamidomethylation	35211000	25567000	27560000	32607000	32678000	27045000	33159000	17401000	25747000	28232000	28688000	35460000	34741000	37579000	29801000	33566000	19732000	25420000	25998000	31594000	22151000	25935000	14365000	22204000	26285000	24509000	32290000	24741000	34519000	27793000	32224000	26732000	34655000	27262000	22188000	28770000	18568	cofilin-2 [Carassius auratus]
699	1197	XP_026117265.1	3.91	7	4	4	Carbamidomethylation	4376300	4938900	3917100	4893700	5612800	5232700	4144800	2962600	6531600	3843600	5413000	6715100	7956600	3701200	4805200	4376300	4329100	3917100	4508000	5235600	5232700	3784100	2700400	5780200	3843600	5049300	6377700	6395200	3701200	4805200	5136000	5494900	6635300	4678400	5036900	5881100	109801	squamous cell carcinoma antigen recognized by T-cells 3-like [Carassius auratus]
700	5393	XP_026113620.1	0.44	20	2	2		2454500	9375300	37155000	12141000	5932700	62186000	6265600	4746100	78766000	283580	4295500	60612000	64289000	35687000	610810	0	0	36711000	163560	0	58706000	50338	149030	72339000	0	206470	54998000	51981000	35687000	610810	24474000	37012000	36034000	18437000	32811000	28697000	13070	vesicle-associated membrane protein 2-like [Carassius auratus]
701	2452	XP_026121999.1	66.93	6	1	1		119350	0	0	0	0	0	0	0	0	0	1274900	0	4609300	721750	1943500	119350	0	0	0	0	0	0	0	0	0	1274900	0	4609300	721750	1943500	119350	0	2137400	119350	0	2137400	55769	probable aminopeptidase NPEPL1 [Carassius auratus]
702	2875	XP_026131833.1	0.56	6	2	2		22830000	15971000	18326000	12020000	12395000	17481000	14999000	20309000	11932000	11312000	19423000	15322000	13077000	11955000	14591000	22830000	15971000	18326000	12020000	12395000	17481000	14999000	20309000	11932000	11312000	19423000	15322000	13077000	11955000	14591000	16475000	15381000	14874000	16475000	15381000	14874000	53744	annexin A4-like isoform X2 [Carassius auratus]
703	2439	XP_026088980.1	7.48	26	2	2		43947000	36598000	38881000	21640000	30653000	52024000	32480000	46630000	58169000	39763000	34016000	35555000	44313000	18596000	38446000	43947000	36598000	38881000	21640000	30653000	52024000	32480000	46630000	58169000	39763000	34016000	35555000	44313000	18596000	38446000	34344000	45813000	34185000	34344000	45813000	34185000	25028	peroxiredoxin-6-like [Carassius auratus]
704	2282	XP_026065014.1	3.6	18	4	4		24370000	15025000	15675000	18738000	27228000	17979000	16133000	14284000	21858000	17397000	17864000	15661000	19437000	30854000	21027000	23347000	12748000	15092000	16128000	27228000	17040000	15048000	13151000	20223000	16877000	16555000	15661000	18060000	30854000	21027000	20532000	17530000	21774000	18909000	16468000	20432000	31369	microtubule-associated protein RP/EB family member 3-like [Carassius auratus]
705	1325	XP_026058402.1	0.12	2	1	1		770610	0	114330	0	60236	332810	39064	0	74816	361680	246710	212340	0	386130	24239	770610	0	114330	0	60236	332810	39064	0	74816	361680	246710	212340	0	386130	24239	315060	202090	217350	315060	202090	217350	77149	dynamin-1-like protein isoform X4 [Carassius auratus]
706	3207	XP_026071700.1	9.01	20	5	5	Carbamidomethylation	42909000	35162000	25069000	27075000	33687000	38603000	39478000	24682000	35435000	26949000	42730000	37352000	43571000	33017000	35994000	38213000	30735000	21485000	25198000	29494000	34368000	33478000	19225000	31787000	25393000	37605000	33066000	37959000	31796000	34085000	32901000	33029000	38533000	29025000	28850000	34902000	49410	mitochondrial enolase superfamily member 1 [Carassius auratus]
707	1909	XP_026112227.1	3.6	17	3	3	Carbamidomethylation	6237900	3988900	10027000	9201400	13121000	8851700	9359000	7496600	14775000	11460000	10446000	9786500	17271000	8582800	10814000	6237900	3988900	10027000	9201400	13121000	8851700	9359000	7496600	14775000	11460000	10446000	9786500	17271000	8582800	10814000	8934000	10522000	13408000	8934000	10522000	13408000	49803	spliceosome RNA helicase DDX39B [Carassius auratus]
708	1882	XP_026131400.1	3.93	11	4	4	Carbamidomethylation	13333000	12488000	11410000	13680000	12455000	13674000	12014000	12122000	17682000	10035000	13110000	11180000	13403000	8750400	8650900	12972000	12167000	11298000	13680000	12061000	13270000	11740000	12122000	17682000	9770600	12847000	11140000	13301000	8493000	8650900	13368000	13231000	11196000	13071000	12917000	11030000	59434	copine-3-like isoform X2 [Carassius auratus]
709	849	XP_026135267.1	0.81	4	2	2	Acetylation (Protein N-term)	759460	768750	285210	449720	806260	516350	695220	817490	393880	0	1023600	634170	2252700	259400	0	759460	768750	285210	449720	806260	516350	695220	817490	393880	0	1023600	634170	2252700	259400	0	613880	679010	1390000	613880	679010	1390000	114919	UDP-N-acetylglucosamine--peptide N-acetylglucosaminyltransferase 110 kDa subunit isoform X7 [Carassius auratus]
710	5940	XP_026124431.1	2.34	15	2	2		56734000	78242000	42307000	31535000	44365000	64443000	87495000	84096000	56564000	31050000	60766000	65808000	107950000	15227000	29315000	29710000	40713000	21806000	14975000	23229000	33530000	47596000	45648000	30079000	16477000	31990000	34107000	61212000	9239900	15937000	50917000	64957000	56398000	26367000	34894000	31081000	15066	astrocytic phosphoprotein PEA-15-like [Carassius auratus]
711	2800	XP_026144921.1	3.65	6	1	1		7275300	7620400	0	7735800	12645000	10167000	8784000	4952800	10220000	0	7628900	7654500	11771000	1292300	1951300	7275300	7620400	0	7735800	12645000	10167000	8784000	4952800	10220000	0	7628900	7654500	11771000	1292300	1951300	8819200	8530800	6059600	8819200	8530800	6059600	22099	visinin-like protein 1 [Carassius auratus]
712	4339	XP_026145750.1	3.64	11	1	1		37557000	8711100	32208000	22970000	31513000	34105000	29341000	33960000	26074000	29422000	30624000	33549000	27009000	35451000	40564000	37557000	8711100	32208000	22970000	31513000	34105000	29341000	33960000	26074000	29422000	30624000	33549000	27009000	35451000	40564000	27388000	30580000	33439000	27388000	30580000	33439000	23508	ras-related protein Rab-5A [Carassius auratus]
713	2345	XP_026086377.1	4.84	5	1	1	Carbamidomethylation	2591400	0	1044100	0	1876800	2943200	2170300	0	0	5207800	3694300	2882400	16623000	343940	146570	2591400	0	1044100	0	1876800	2943200	2170300	0	0	5207800	3694300	2882400	16623000	343940	146570	1837400	3440400	4738100	1837400	3440400	4738100	107027	alanine--tRNA ligase cytoplasmic-like [Carassius auratus]
714	2799	XP_026112808.1	4.11	6	1	1		0	2133400	539660	1376000	3281900	3990300	3612600	909910	4036900	1130800	3071500	815970	3471300	78338	205040	0	2133400	539660	1376000	3281900	3990300	3612600	909910	4036900	1130800	3071500	815970	3471300	78338	205040	1832700	2736100	1528400	1832700	2736100	1528400	22113	visinin-like protein 1 [Carassius auratus]
715	4275	XP_026140181.1	15.28	28	4	4	Carbamidomethylation	19877000	15354000	11059000	56842000	18005000	18628000	17033000	8998500	19008000	14704000	30749000	33581000	24778000	44322000	53938000	18639000	12689000	11059000	55128000	15966000	17633000	14348000	7678000	16835000	14704000	27221000	31457000	17875000	44322000	53817000	39419000	18276000	38452000	37505000	16482000	35283000	33958	uridine phosphorylase 1-like isoform X2 [Carassius auratus]
716	2142	XP_026143631.1	10.7	20	4	4		17074000	23625000	16074000	22607000	21432000	13471000	15847000	17376000	12370000	12231000	17154000	14257000	22215000	16076000	13386000	14104000	23072000	15129000	22607000	20833000	11213000	14462000	17351000	11866000	10263000	15370000	12601000	21035000	14835000	13200000	22767000	16354000	17347000	21500000	15126000	16138000	38883	tropomodulin-3-like [Carassius auratus]
717	2287	XP_026127001.1	0.66	3	1	1		1569100	0	0	200790	1920600	464430	1913600	215720	0	0	0	1055200	2094900	0	376050	1569100	0	0	200790	1920600	464430	1913600	215720	0	0	0	1055200	2094900	0	376050	1230200	864570	1175400	1230200	864570	1175400	35172	annexin A5-like [Carassius auratus]
718	1741	XP_026112261.1	4.69	13	4	4	Carbamidomethylation; Acetylation (Protein N-term)	11757000	7915300	10186000	13786000	26583000	11275000	10975000	8935900	26674000	16176000	12215000	14748000	31106000	23025000	19048000	11757000	7915300	9694100	10012000	21529000	10570000	9048900	7823100	24044000	15346000	10798000	12031000	22632000	22514000	17475000	15288000	14807000	20028000	12182000	13366000	17090000	66129	glutamate decarboxylase 1-like isoform X1 [Carassius auratus]
719	1720	XP_026139412.1	7.51	10	1	1	Oxidation (M)	0	0	11311000	0	0	0	0	0	8408000	0	0	0	0	0	0	0	0	11311000	0	0	0	0	0	8408000	0	0	0	0	0	0	11311000	8408000	0	11311000	8408000	0	47859	26S proteasome regulatory subunit 6B-like [Carassius auratus]
720	4272	XP_026083432.1	3.69	3	2	2		9556200	13183000	9432600	24371000	23934000	9785900	12181000	13305000	16382000	8579900	11571000	13714000	17811000	19709000	9044900	5506600	6746400	7037600	13210000	13463000	7168200	6022400	7029400	8583400	6248000	6725800	8803900	6489000	15186000	7137500	16095000	12047000	14370000	9192800	7010300	8868400	83422	synaptic vesicle glycoprotein 2A-like [Carassius auratus]
721	2463	XP_026122416.1	7.34	24	7	7		22212000	42859000	17877000	24492000	30924000	36954000	33004000	33151000	23906000	31145000	34519000	31242000	43005000	24270000	38574000	15676000	34097000	14683000	16669000	17542000	29126000	26833000	28649000	14515000	26076000	26944000	26263000	35619000	19606000	34516000	28221000	31632000	36505000	19733000	25039000	29638000	52694	NADH dehydrogenase [ubiquinone] iron-sulfur protein 2 mitochondrial isoform X1 [Carassius auratus]
722	3010	XP_026058203.1	2.89	59	7	7	Carbamidomethylation	148030000	97343000	116210000	161670000	175470000	113410000	81077000	108220000	125940000	106480000	135110000	79679000	93608000	198450000	130510000	97959000	50682000	84772000	90352000	104560000	76371000	41203000	70346000	79306000	74572000	90177000	48321000	38574000	143090000	103500000	140550000	107030000	127980000	86474000	68360000	85244000	15775	cellular retinoic acid-binding protein 1-like [Carassius auratus]
723	1907	XP_026139184.1	3.07	2	1	1		1804400	1149800	1453200	764530	1675000	1239500	1660000	778060	1476800	934680	1621600	858870	1260200	870860	436060	1804400	1149800	1453200	764530	1675000	1239500	1660000	778060	1476800	934680	1621600	858870	1260200	870860	436060	1369400	1217800	1009500	1369400	1217800	1009500	70401	polyadenylate-binding protein 1-like [Carassius auratus]
724	2586	XP_026128995.1	3.29	20	2	2	Acetylation (Protein N-term)	7024200	6156000	2232400	13632000	10196000	5775000	4851800	749020	8196400	3485600	5659700	3352600	4744600	5516200	3615100	7024200	6156000	2232400	13632000	10196000	5775000	4851800	749020	8196400	3485600	5659700	3352600	4744600	5516200	3615100	10301000	7844800	7553900	10301000	7844800	7553900	33226	heterogeneous nuclear ribonucleoprotein D-like [Carassius auratus]
725	2437	XP_026147189.1	1.79	25	2	2		168460000	107500000	132100000	53143000	84950000	136720000	88057000	135580000	83035000	115380000	118190000	105370000	114340000	110020000	157280000	168460000	107500000	132100000	53143000	84950000	136720000	88057000	135580000	83035000	115380000	118190000	105370000	114340000	110020000	157280000	113520000	115750000	121040000	113520000	115750000	121040000	25011	peroxiredoxin-6-like [Carassius auratus]
726	1444	XP_026125949.1	3.21	5	1	1	Carbamidomethylation	0	296270	0	0	659140	1152700	1023800	904580	1124000	378060	1472300	859020	5599400	432910	249010	0	296270	0	0	659140	1152700	1023800	904580	1124000	378060	1472300	859020	5599400	432910	249010	477700	916610	1722500	477700	916610	1722500	60830	S-adenosylhomocysteine hydrolase-like protein 1 isoform X2 [Carassius auratus]
727	2237	XP_026051155.1	6.72	4	1	1		0	1425500	0	1002500	843390	256150	477730	478110	819770	0	0	473670	2225100	0	0	0	1425500	0	1002500	843390	256150	477730	478110	819770	0	0	473670	2225100	0	0	1090500	507940	1349400	1090500	507940	1349400	46632	lissencephaly-1 homolog B [Carassius auratus]
728	3388	XP_026098154.1	6.78	8	1	1		1156500	1159000	1416000	148180	697260	1600700	1346100	2001100	2456300	1394000	1536100	1415100	1623000	730270	2389500	1156500	1159000	1416000	148180	697260	1600700	1346100	2001100	2456300	1394000	1536100	1415100	1623000	730270	2389500	915400	1759700	1538800	915400	1759700	1538800	21025	ras-related protein Rap-1A-like [Carassius auratus]
729	4316	XP_026062392.1	2.1	10	4	4		98320000	94952000	57020000	96341000	127970000	80316000	100650000	56530000	111230000	67014000	84460000	82684000	103340000	82420000	47873000	98320000	94952000	57020000	96341000	127970000	80316000	100650000	56530000	111230000	64998000	84460000	82684000	103340000	74310000	47873000	94920000	84759000	87235000	94920000	82744000	79124000	68937	microtubule-associated protein 4-like isoform X2 [Carassius auratus]
730	2458	XP_026115376.1	11.45	5	1	1		647720	654970	0	374660	660270	1132100	905200	858580	855930	0	0	1136800	1164500	591100	890840	647720	654970	0	374660	660270	1132100	905200	858580	855930	0	0	1136800	1164500	591100	890840	584400	937950	945810	584400	937950	945810	44804	cAMP-dependent protein kinase type II-alpha regulatory subunit-like [Carassius auratus]
731	3096	XP_026088913.1	1.51	32	7	7	Carbamidomethylation; Acetylation (Protein N-term); Oxidation (M)	156870000	195170000	81965000	259590000	217870000	119690000	216690000	85265000	145530000	129610000	121730000	153250000	155470000	139490000	98686000	76569000	80480000	48257000	93469000	90897000	70532000	88313000	35007000	82392000	77298000	67264000	71661000	70746000	75256000	54943000	188070000	143280000	140100000	78133000	70808000	67974000	29169	syntaxin-binding protein 6-like isoform X2 [Carassius auratus]
732	1889	XP_026138833.1	5.2	11	3	3		16658000	13167000	9651500	10164000	13650000	16734000	16131000	11294000	15218000	12621000	15470000	15630000	21308000	12659000	14269000	16658000	13167000	9651500	10164000	13650000	16734000	16131000	11294000	15218000	12621000	15470000	15630000	21308000	12659000	14269000	12658000	14400000	15867000	12658000	14400000	15867000	39466	protein phosphatase 1 regulatory subunit 7-like [Carassius auratus]
733	3294	XP_026057544.1	13.88	20	5	5		54141000	39706000	39807000	47912000	50116000	49751000	33485000	37285000	45616000	33811000	38054000	30384000	36353000	43683000	41898000	48611000	38680000	37718000	42699000	46620000	45355000	32569000	36168000	42453000	31398000	34116000	28793000	33223000	37308000	37437000	47728000	40200000	38075000	42866000	37589000	34175000	46032	60S ribosomal protein L3-like isoform X1 [Carassius auratus]
735	2633	XP_026098150.1	2.78	8	3	3	Carbamidomethylation	14170000	11973000	8245400	17314000	18272000	13754000	10185000	8457400	14737000	9503200	10317000	10961000	12092000	11963000	10831000	14170000	11973000	8245400	17314000	18272000	13754000	10185000	8457400	14737000	9503200	10317000	10961000	12092000	11963000	10831000	13995000	11327000	11233000	13995000	11327000	11233000	69969	dolichyl-diphosphooligosaccharide--protein glycosyltransferase subunit 2-like isoform X1 [Carassius auratus]
736	5074	XP_026077664.1	0.1	11	2	2		3418000	8419000	1158700	3034700	2001000	3240100	9597800	4723700	2601900	564570	5289100	3454800	7814800	3743900	2050200	1522500	7566300	149640	441290	1063100	755240	6958500	2648100	706250	158850	2961000	216280	6891900	0	117100	3606300	4145600	4979900	2148500	2245400	2546600	21370	cell division control protein 42 homolog isoform X2 [Carassius auratus]
737	5329	XP_026093663.1	8.54	30	2	2	Carbamidomethylation	46499000	67170000	51766000	73694000	53384000	50585000	48941000	54718000	59371000	34223000	45424000	43530000	55795000	28915000	40654000	46499000	67170000	51766000	73694000	53384000	50585000	48941000	54718000	59371000	34223000	45424000	43530000	55795000	28915000	40654000	60612000	50161000	45211000	60612000	50161000	45211000	16918	eukaryotic translation initiation factor 5A-1-like [Carassius auratus]
738	3338	XP_026139066.1	1.12	5	2	2		18568000	12583000	9869900	9065200	18571000	16522000	21033000	11239000	18802000	8817500	14849000	19718000	15336000	9613500	5152200	18568000	12583000	9869900	9065200	18571000	16522000	21033000	11239000	18802000	8817500	14849000	19718000	15336000	9613500	5152200	13732000	15282000	12934000	13732000	15282000	12934000	83544	synaptic vesicle glycoprotein 2A [Carassius auratus]
739	2519	XP_026099028.1	9.53	4	1	1		0	1009600	25392	808590	1558400	222440	0	537350	804750	0	0	0	1766000	0	0	0	1009600	25392	808590	1558400	222440	0	537350	804750	0	0	0	1766000	0	0	850490	521510	1766000	850490	521510	1766000	46624	lissencephaly-1 homolog B-like [Carassius auratus]
740	4152	XP_026090905.1	0.04	17	2	2		34764000	34428000	41002000	17987000	8845900	19424000	30792000	39942000	18554000	21735000	25608000	22947000	24179000	20006000	30857000	34764000	34428000	41002000	17987000	8845900	19424000	30792000	39942000	18554000	21735000	25608000	22947000	24179000	20006000	30857000	28388000	26655000	25322000	28388000	26655000	25322000	17324	peroxiredoxin-5 mitochondrial-like [Carassius auratus]
741	2921	XP_026066885.1	12.05	61	6	6	Acetylation (Protein N-term)	70279000	35383000	55401000	47117000	50170000	68650000	62658000	56314000	74670000	58097000	64652000	74457000	84578000	61198000	72748000	65978000	30098000	50914000	40482000	42018000	63327000	49631000	47443000	59925000	54960000	58813000	63892000	65790000	56568000	67196000	59172000	67657000	75600000	51835000	55456000	62452000	25329	platelet-activating factor acetylhydrolase IB subunit beta-like [Carassius auratus]
742	2003	XP_026107419.1	2.65	4	2	2	Carbamidomethylation; Acetylation (Protein N-term)	6746800	3180500	3001700	1488000	2735000	4654500	4359600	822980	4400800	3572500	4436700	4634900	3599700	4058400	3114000	6746800	3180500	3001700	1488000	2735000	4654500	4359600	822980	4400800	3572500	4436700	4634900	3599700	4058400	3114000	3430400	3562100	3968700	3430400	3562100	3968700	55072	UTP--glucose-1-phosphate uridylyltransferase-like isoform X2 [Carassius auratus]
743	2440	XP_026113180.1	6.54	6	1	1		6372900	5532100	7192600	4183100	6524900	8184200	6536000	8023700	10223000	5831300	7307800	7089000	7394400	3686900	6369700	6372900	5532100	7192600	4183100	6524900	8184200	6536000	8023700	10223000	5831300	7307800	7089000	7394400	3686900	6369700	5961100	7759500	6369600	5961100	7759500	6369600	43238	interleukin enhancer-binding factor 2 homolog [Carassius auratus]
745	3778	XP_026057430.1	3.92	3	1	1		377720	520000	1106700	1322100	1580100	302010	339270	781540	1254900	799480	734610	859570	869000	1522800	916040	377720	520000	1106700	1322100	1580100	302010	339270	781540	1254900	799480	734610	859570	869000	1522800	916040	981330	695440	980410	981330	695440	980410	105301	microtubule-associated protein 4-like isoform X8 [Carassius auratus]
746	2861	XP_026053376.1	0.42	27	4	4	Carbamidomethylation	15306000	12693000	10499000	14143000	19338000	15640000	15919000	6618000	20112000	12969000	13668000	17533000	13422000	20461000	10517000	14959000	10904000	9331500	12565000	16552000	14021000	13461000	5669900	16000000	12506000	11487000	13503000	11388000	19445000	10210000	14396000	14252000	15120000	12862000	12331000	13207000	25001	ras-related protein Rab-3B-like isoform X1 [Carassius auratus]
747	1577	XP_026134049.1	8.21	30	8	8	Carbamidomethylation	34050000	20221000	20331000	43881000	36797000	21310000	23946000	18293000	27906000	23498000	18984000	17713000	21225000	28271000	21690000	16070000	15406000	12177000	26307000	24950000	15027000	11651000	9700800	14948000	12577000	13003000	8252400	12421000	18957000	9719100	34525000	25493000	27867000	19722000	14437000	15620000	42716	protein phosphatase 1A isoform X2 [Carassius auratus]
748	3873	XP_026145584.1	2.94	28	7	7	Carbamidomethylation	11357000	17794000	8773600	16739000	27477000	13941000	17368000	9650300	21990000	8542500	11177000	9652900	26989000	9313000	4053500	7622500	11553000	6754700	9076600	13889000	9506800	10142000	4421000	14700000	5614600	8416200	6460900	12513000	7024400	2713400	17660000	15143000	17156000	9779300	8877000	7425600	29730	proteasome subunit beta type-5-like [Carassius auratus]
749	4669	XP_026057067.1	0.31	18	1	1		38740000	15410000	43528000	52218000	34867000	40163000	34764000	43577000	39187000	24076000	36782000	39397000	34790000	29007000	30976000	38740000	15410000	43528000	52218000	34867000	40163000	34764000	43577000	39187000	24076000	36782000	39397000	34790000	29007000	30976000	43040000	36353000	34190000	43040000	36353000	34190000	16960	eukaryotic translation initiation factor 5A-1-like [Carassius auratus]
750	2470	XP_026063417.1	1.23	23	6	6		28483000	37006000	24049000	37656000	42491000	27446000	27475000	30551000	41775000	27465000	35352000	32925000	37407000	38898000	27500000	25383000	32852000	21493000	34322000	38357000	26014000	25529000	28461000	33814000	23083000	21535000	30215000	29496000	32625000	23646000	35227000	32151000	36023000	31331000	27380000	28410000	43666	branched-chain-amino-acid aminotransferase cytosolic-like [Carassius auratus]
751	3304	XP_026055184.1	4.08	10	2	2		8343300	6403800	7334100	4625600	3240000	8919200	8836300	6565700	7788800	6085300	6288900	7780100	9203300	7122800	6291200	8343300	6403800	7334100	4625600	3240000	8919200	8836300	6565700	7788800	6085300	6288900	7780100	9203300	7122800	6291200	6284200	7639100	7623800	6284200	7639100	7623800	50666	elongation factor 1-alpha 2-like [Carassius auratus]
752	2523	XP_026073617.1	7.3	15	4	4		9652400	10190000	11081000	32482000	4159800	11537000	13540000	9251200	2921500	12565000	18750000	20543000	15338000	23370000	46327000	8958000	10190000	11081000	29558000	4159800	9708900	12880000	9251200	2921500	12565000	14472000	17068000	8886400	22026000	43882000	17175000	12514000	25082000	15366000	11270000	21483000	39473	phosphoribosyl pyrophosphate synthase-associated protein 1 isoform X2 [Carassius auratus]
753	478	XP_026109940.1	4.8	10	12	12	Carbamidomethylation	14373000	11324000	12821000	14582000	19558000	13799000	15366000	7676500	16039000	13945000	14746000	13629000	18759000	11874000	6920300	6954400	6101600	4347900	7071600	9868500	4479100	4305500	2273600	7328000	5906300	6301600	6166700	7116700	5579400	3161800	15732000	14957000	16374000	6868800	5149700	5665200	263195	acetyl-CoA carboxylase isoform X9 [Carassius auratus]
754	2886	XP_026062581.1	1.04	4	1	1	Carbamidomethylation	952660	1131800	282280	1696300	3214400	882000	2305500	708110	2074100	134650	0	728550	3066800	328700	302840	952660	1131800	282280	1696300	3214400	882000	2305500	708110	2074100	134650	0	728550	3066800	328700	302840	1455500	1220900	1106700	1455500	1220900	1106700	60962	alanine aminotransferase 2-like isoform X1 [Carassius auratus]
755	2414	XP_026069498.1	1.06	13	2	2		16704000	10325000	8202900	12218000	16364000	15389000	13224000	6385100	14432000	13524000	13282000	16001000	10226000	19208000	11375000	16704000	10325000	8202900	12218000	16364000	15389000	13224000	6385100	14432000	13524000	13282000	16001000	10226000	19208000	11375000	12763000	12591000	14018000	12763000	12591000	14018000	33633	prohibitin-2-like [Carassius auratus]
756	5331	XP_026068245.1	6.01	9	2	2		12835000	7388000	7310400	6342900	10336000	6293200	10633000	3847000	10437000	5779100	6947800	7809700	11048000	9827800	5789100	8611500	5330500	6149700	5958300	8767900	4125000	6751700	3335300	7478400	3847100	4427400	4206500	7390900	8301100	4693100	8842400	7397700	8284500	6963600	5107500	5803800	13406	V-type proton ATPase subunit G 1-like [Carassius auratus]
757	5344	XP_026098902.1	3.02	37	6	6	Carbamidomethylation	33636000	34267000	23469000	57738000	44028000	29135000	34646000	32224000	34816000	23215000	36596000	32705000	52479000	46950000	28760000	30000000	31873000	20816000	51215000	37684000	25260000	32093000	28656000	31335000	20969000	31108000	27189000	43104000	38833000	21339000	40597000	34132000	40377000	34318000	27663000	32315000	34178	succinate--CoA ligase [ADP/GDP-forming] subunit alpha mitochondrial [Carassius auratus]
758	2990	XP_026053217.1	6.66	24	6	6	Carbamidomethylation	93017000	91059000	69895000	64836000	81508000	117210000	134050000	92159000	102650000	62502000	117550000	110080000	118070000	60214000	68729000	66780000	43643000	52766000	46962000	48433000	75135000	74406000	54182000	63230000	52139000	70258000	64134000	35722000	48142000	56870000	80063000	102110000	97082000	51717000	63818000	55025000	34674	glycerol-3-phosphate dehydrogenase [NAD(+)] cytoplasmic-like isoform X2 [Carassius auratus]
759	3755	XP_026104339.1	2.79	22	7	7	Carbamidomethylation	172630000	157280000	117270000	292410000	287430000	186710000	173790000	127990000	225580000	194760000	161660000	107940000	192610000	219490000	106870000	156360000	125080000	100970000	226340000	223980000	162350000	147240000	103010000	185350000	173380000	136880000	88064000	146480000	188750000	91647000	205710000	181770000	157720000	166540000	154270000	130360000	43107	gap junction alpha-1 protein-like [Carassius auratus]
760	2472	XP_026141790.1	8.7	5	1	1		2457700	1492700	1926400	1339500	1896000	1386100	2093700	1362000	2464100	2912100	2064000	2327000	2170000	3881800	2750100	2457700	1492700	1926400	1339500	1896000	1386100	2093700	1362000	2464100	2912100	2064000	2327000	2170000	3881800	2750100	1822500	2043600	2638600	1822500	2043600	2638600	46202	medium-chain specific acyl-CoA dehydrogenase mitochondrial-like [Carassius auratus]
761	3638	XP_026057424.1	0.81	1	1	1		1587300	6337200	2179400	5506300	4840600	3584900	6344300	3009700	5772700	1096800	4697500	6890600	7257200	304760	871290	1587300	6337200	2179400	5506300	4840600	3584900	6344300	3009700	5772700	1096800	4697500	6890600	7257200	304760	871290	4090200	3961700	4004300	4090200	3961700	4004300	131557	microtubule-associated protein 4-like isoform X2 [Carassius auratus]
762	2320	XP_026082712.1	0.28	17	7	7	Carbamidomethylation	11323000	18989000	594910	15955000	24979000	13687000	23974000	22621000	29106000	7119300	17025000	24348000	33333000	8846100	13275000	9767600	15645000	0	13073000	23275000	12111000	20536000	18206000	25863000	4781100	13798000	20644000	29626000	4020700	9706300	19435000	24589000	24820000	16800000	19882000	19454000	79926	1 4-alpha-glucan-branching enzyme-like [Carassius auratus]
763	3412	XP_026145088.1	9.53	9	2	2		73923000	73810000	58358000	176110000	88527000	57739000	48056000	60658000	51959000	43852000	57308000	24133000	44743000	76502000	56584000	73923000	73810000	58358000	176110000	88527000	57739000	48056000	60658000	51959000	43852000	57308000	24133000	44743000	76502000	56584000	94146000	52453000	51854000	94146000	52453000	51854000	26451	glutathione S-transferase A-like [Carassius auratus]
764	3129	XP_026064516.1	0.98	10	3	3		36417000	30296000	15154000	34746000	35461000	30764000	35987000	18273000	32783000	13359000	34571000	28484000	43332000	20321000	20982000	36417000	30296000	15154000	34746000	35461000	30764000	35987000	18273000	32783000	13359000	34571000	28484000	43332000	20321000	20982000	30651000	26233000	29843000	30651000	26233000	29843000	46953	2' 3'-cyclic-nucleotide 3'-phosphodiesterase-like [Carassius auratus]
765	3878	XP_026100376.1	6.4	37	6	6	Carbamidomethylation	143640000	95841000	93832000	85483000	91078000	119230000	112360000	68316000	108050000	107480000	114480000	120930000	115230000	132430000	98032000	120650000	83357000	79828000	63726000	80096000	99287000	99792000	65362000	94932000	85704000	99689000	104880000	102690000	98604000	89888000	109580000	114450000	130920000	86319000	89265000	99434000	27024	thioredoxin-dependent peroxide reductase mitochondrial-like [Carassius auratus]
766	1054	XP_026134583.1	0.4	2	2	2		358900	1418300	77651	460080	833860	447440	1704900	884320	481650	86442	870100	703350	1944500	117540	0	358900	1418300	77651	460080	833860	447440	1704900	884320	481650	86442	870100	703350	1944500	117540	0	787200	844190	1151800	787200	844190	1151800	151316	eukaryotic translation initiation factor 3 subunit A isoform X4 [Carassius auratus]
767	2760	XP_026108106.1	1.84	18	6	6		244470000	194920000	135030000	198220000	265350000	207790000	195400000	125250000	234700000	155130000	188410000	173560000	244280000	201350000	121250000	151500000	156140000	88904000	163920000	211500000	143210000	153580000	99752000	177800000	88996000	138430000	129340000	196990000	111020000	67737000	208090000	186330000	186040000	154390000	132670000	128700000	39289	pyruvate dehydrogenase E1 component subunit beta mitochondrial [Carassius auratus]
768	3882	XP_026139001.1	5.23	11	1	1		10033000	1607900	8241300	4988200	6673500	9750100	7998400	9688800	6860900	7605200	8438500	9463300	7201800	10028000	11265000	10033000	1607900	8241300	4988200	6673500	9750100	7998400	9688800	6860900	7605200	8438500	9463300	7201800	10028000	11265000	6308900	8380700	9279300	6308900	8380700	9279300	23390	ras-related protein Rab-5A-like [Carassius auratus]
769	3455	XP_026052085.1	2.54	23	7	7		21938000	5080700	3843500	6705800	25510000	43276000	18041000	4422900	5726600	8146400	16810000	8111300	16653000	37316000	11512000	18083000	4205400	3771700	5507900	17654000	30222000	12431000	3194400	4186600	7585700	13007000	6474400	10209000	31250000	10192000	14728000	17335000	20308000	9844300	12175000	14227000	34011	erythrocyte band 7 integral membrane protein-like isoform X1 [Carassius auratus]
770	2854	XP_026108816.1	0.16	21	8	8	Carbamidomethylation	18753000	15798000	12441000	13906000	16676000	20414000	15685000	14274000	15229000	15038000	18131000	20605000	15116000	16686000	12462000	15461000	11986000	9382500	9452000	12281000	13912000	13878000	9562900	11015000	11547000	12634000	14415000	11030000	13053000	8940300	17186000	17134000	18471000	11712000	11983000	12015000	52695	tryptophan--tRNA ligase cytoplasmic-like [Carassius auratus]
771	2911	XP_026075063.1	5.13	20	3	3	Acetylation (Protein N-term)	7857000	2240700	4811400	10704000	9754200	5099500	6399700	2593900	5988800	5204700	8452800	6270900	10103000	5260700	5238200	7181600	468890	4811400	8689200	8286800	3988900	4077800	710550	4188000	5024000	6552000	4952600	6870400	5260700	5042700	8433800	8141500	10217000	6951400	6516700	8296700	33251	heterogeneous nuclear ribonucleoprotein D-like [Carassius auratus]
772	1299	XP_026055229.1	4.8	18	3	3		11470000	4066100	1751400	6362200	14653000	740450	15466000	312180	0	532270	5054200	10116000	2653800	2838600	2845600	11470000	4066100	1751400	6362200	14653000	740450	15466000	312180	0	532270	5054200	10116000	2653800	2838600	2845600	9625100	8792400	7836100	9625100	8792400	7836100	49092	keratin type I cytoskeletal 18 [Carassius auratus]
773	1829	XP_026113463.1	19.86	7	7	7		14391000	20113000	14392000	24284000	13069000	10652000	10142000	10429000	8915100	8836500	15531000	9766200	12978000	9639800	7031200	12830000	12787000	12090000	14914000	8791800	8350600	7755900	7737400	5400200	7944500	10439000	7595600	9778400	9090500	6385700	18884000	11180000	12319000	12873000	7839500	9006500	227717	myosin-11-like isoform X2 [Carassius auratus]
774	3741	XP_026146294.1	0.47	35	6	6		54758000	61094000	32601000	50763000	60787000	50095000	59952000	42124000	60993000	30398000	49846000	58995000	67193000	37306000	28828000	44745000	45736000	27081000	34676000	46945000	40789000	45818000	31987000	47872000	25299000	39684000	50364000	49287000	27475000	20563000	53442000	49391000	50056000	39836000	38353000	37475000	28122	V-type proton ATPase subunit D-like [Carassius auratus]
775	2484	XP_026123828.1	1.06	37	10	10	Carbamidomethylation	49316000	38162000	23650000	28277000	51281000	44800000	44170000	27746000	45083000	25187000	38480000	37807000	69841000	33974000	22043000	33351000	27001000	19038000	19426000	34244000	28851000	24994000	16115000	27411000	19230000	25288000	22410000	39109000	25288000	14320000	39115000	37617000	40587000	26612000	23320000	25283000	29712	40S ribosomal protein S4 X isoform-like [Carassius auratus]
776	7805	XP_026062930.1	1.07	15	2	2		72671000	107630000	68364000	149940000	51244000	83361000	82776000	83697000	103120000	63033000	80882000	84708000	116160000	43087000	47185000	39485000	93428000	28883000	104000000	31125000	52940000	71159000	65072000	78446000	27383000	54633000	56921000	111110000	16362000	21283000	91532000	85376000	78345000	60949000	61179000	54450000	23290	ADP-ribosylation factor-like protein 6-interacting protein 1 [Carassius auratus]
777	1925	XP_026080914.1	0.94	5	1	1		3511900	4145400	1852200	4224000	7697700	4839200	0	2900800	6373700	1722100	4023100	3729600	6072100	2714300	880310	3511900	4145400	1852200	4224000	7697700	4839200	0	2900800	6373700	1722100	4023100	3729600	6072100	2714300	880310	4286300	3958900	3483900	4286300	3958900	3483900	35151	guanine nucleotide-binding protein subunit beta-2-like 1 [Carassius auratus]
778	4594	XP_026143246.1	0.18	12	2	2		1535000	3337800	1532300	15661000	8212200	3049900	9079400	4686100	2927200	1746000	4482700	2452800	10277000	3313800	3081200	1535000	3337800	1532300	15661000	8212200	3049900	9079400	4686100	2927200	1746000	4482700	2452800	10277000	3313800	3081200	8007300	5682500	5324200	8007300	5682500	5324200	43810	dual specificity mitogen-activated protein kinase kinase 1 [Carassius auratus]
779	6751	XP_026060995.1	1.41	33	4	4	Acetylation (Protein N-term)	161970000	182100000	148310000	163330000	166990000	142080000	159070000	179320000	196470000	127440000	160230000	157220000	226580000	111550000	121350000	136020000	91398000	124300000	124150000	116910000	105700000	78404000	107020000	143780000	119180000	109400000	111900000	107720000	108300000	117140000	168600000	162700000	163640000	122620000	112640000	113480000	18354	cold-inducible RNA-binding protein B-like isoform X2 [Carassius auratus]
780	3005	XP_026097007.1	8.08	69	7	7	Carbamidomethylation; Oxidation (M)	275610000	251800000	163830000	329620000	291330000	197070000	193040000	160680000	215850000	119930000	201470000	169370000	274730000	289020000	225510000	240260000	206330000	130690000	272150000	259860000	174590000	165320000	117150000	193180000	100780000	181340000	141050000	237120000	239640000	191350000	264100000	187530000	233860000	221860000	159620000	198100000	17230	nucleoside diphosphate kinase [Carassius auratus]
781	3744	XP_026129513.1	3.3	33	7	7	Carbamidomethylation	98825000	52659000	63753000	65547000	78472000	82053000	69054000	42031000	70732000	22352000	73867000	70586000	43761000	101530000	90333000	75108000	34680000	51173000	34489000	47592000	63681000	52719000	27991000	51671000	11822000	57678000	62449000	27414000	82884000	77877000	71979000	60755000	76289000	48736000	45088000	61933000	28702	40S ribosomal protein S6-like [Carassius auratus]
782	2493	XP_026142797.1	0.42	6	2	2	Carbamidomethylation	4674700	4529300	1832800	2992500	4598700	3873300	5834900	2638600	5342900	1381200	5040500	5206700	4979100	3398400	1936100	4674700	4529300	1832800	2992500	4598700	3873300	5834900	2638600	5342900	1381200	5040500	5206700	4979100	3398400	1936100	3890400	4012100	4538900	3890400	4012100	4538900	55457	xaa-Pro dipeptidase-like [Carassius auratus]
783	966	XP_026081015.1	1.89	10	8	8		8823200	16692000	13001000	22404000	24832000	11311000	28490000	18710000	17690000	7298500	18777000	20056000	21501000	10313000	18370000	7109800	10582000	11503000	20186000	17269000	6247300	18190000	9790500	11175000	6082700	12442000	9512100	10476000	9506500	14450000	18486000	17621000	20039000	13646000	10297000	11277000	145617	cytoplasmic FMR1-interacting protein 2-like [Carassius auratus]
784	4523	XP_026139996.1	1.83	46	2	2	Carbamidomethylation; Acetylation (Protein N-term)	3451000	5413500	5223400	10033000	11680000	4189700	5929200	4218200	7381600	4220900	5359600	6149500	5299600	5965400	4152800	3451000	5413500	5223400	10033000	11680000	4189700	5929200	4218200	7381600	4220900	5359600	6149500	5299600	5965400	4152800	7160200	5187900	5385400	7160200	5187900	5385400	12562	synaptobrevin-like [Carassius auratus]
785	5349	XP_026088224.1	3.52	86	7	7	Carbamidomethylation	38852000	59914000	39539000	60398000	45442000	50360000	67238000	53948000	59663000	38688000	55909000	56781000	83742000	48213000	57809000	33221000	51940000	31353000	55883000	38639000	43624000	56711000	44501000	51852000	32418000	46958000	47612000	68232000	40604000	50537000	50057000	56153000	62194000	42207000	45821000	50789000	13218	V-type proton ATPase subunit F [Carassius auratus]
786	4683	XP_026080892.1	2.9	3	1	1	Carbamidomethylation	0	1131900	2196200	903120	3488500	2240400	2809000	1828400	1701300	4103300	2579500	2308900	3743900	2479100	1949200	0	1131900	2196200	903120	3488500	2240400	2809000	1828400	1701300	4103300	2579500	2308900	3743900	2479100	1949200	1929900	2536500	2612100	1929900	2536500	2612100	75394	choline transporter-like protein 1 isoform X3 [Carassius auratus]
788	2733	XP_026064742.1	1.38	8	2	2		18627000	13522000	8630500	11389000	22309000	16541000	15381000	7005000	17339000	15816000	13377000	14750000	14996000	19664000	12581000	13848000	8250000	6130800	7911800	11318000	11436000	11073000	4044100	11894000	9721100	9881000	10834000	9850800	12038000	8483600	14895000	14416000	15073000	9491800	9633700	10218000	21450	ras-related C3 botulinum toxin substrate 1 [Carassius auratus]
789	2491	XP_026063840.1	13.63	7	3	3	Carbamidomethylation	8195500	1918300	2471300	1949500	4965000	20762000	7259600	10524000	4015900	9194000	4934000	7135200	13080000	16300000	13472000	8195500	1918300	2471300	1949500	4965000	20762000	7259600	10524000	4015900	9194000	4934000	7135200	13080000	16300000	13472000	5249200	16883000	12123000	5249200	16883000	12123000	80414	glycogen [starch] synthase muscle-like [Carassius auratus]
790	1846	XP_026097425.1	2.27	28	8	8	Carbamidomethylation	40234000	34843000	32340000	50887000	58589000	46529000	46364000	25779000	43963000	34567000	38844000	34913000	45301000	57621000	43411000	23362000	15984000	23411000	40152000	29765000	25799000	25575000	17338000	22705000	22950000	21736000	19792000	22910000	43287000	31169000	44621000	39440000	44018000	27777000	22873000	27779000	42845	leukocyte elastase inhibitor-like [Carassius auratus]
791	2534	XP_026124768.1	12.01	23	5	5	Carbamidomethylation	39161000	56235000	46703000	56061000	31395000	36964000	12922000	23913000	19524000	35084000	42753000	30234000	23836000	25622000	44891000	31897000	51910000	43490000	52747000	26592000	31150000	9089300	20386000	15930000	28736000	37569000	25612000	19875000	19180000	39696000	46275000	25681000	33467000	41327000	21058000	28386000	43022	septin-5-like isoform X2 [Carassius auratus]
792	2798	XP_026087329.1	7.38	10	4	4		21044000	18517000	15762000	37388000	28114000	12734000	15064000	16727000	19706000	14067000	13010000	10978000	21215000	21470000	15522000	16293000	15077000	13960000	29726000	25936000	12734000	12255000	14283000	16949000	11358000	13010000	10065000	18793000	16869000	12154000	24165000	16196000	17004000	20199000	13516000	14178000	67486	splicing factor proline- and glutamine-rich-like [Carassius auratus]
793	3887	XP_026124947.1	7.38	15	4	4		35314000	34313000	26229000	31854000	23551000	30010000	29130000	20481000	29152000	20963000	27380000	19966000	35434000	31972000	24071000	31401000	28253000	23711000	31854000	23551000	26143000	23842000	16255000	24251000	20963000	24069000	17830000	27130000	29940000	24071000	31918000	26861000	28553000	27754000	22291000	24608000	37047	uncharacterized protein LOC113107033 [Carassius auratus]
794	2641	XP_026111013.1	1.31	3	1	1		0	1441800	193610	424650	1379200	2302600	2004800	604930	1424700	332490	1598800	1849100	2901200	175800	362250	0	1441800	193610	424650	1379200	2302600	2004800	604930	1424700	332490	1598800	1849100	2901200	175800	362250	859820	1333900	1377400	859820	1333900	1377400	33954	mitochondrial 2-oxoglutarate/malate carrier protein-like [Carassius auratus]
795	2241	XP_026098903.1	2.5	11	3	3	Carbamidomethylation	6081600	9646800	4414900	9995200	12600000	9434400	9042300	5719200	7476400	1794700	7514300	11269000	18420000	513660	2059500	6081600	9646800	4414900	9995200	12600000	9434400	9042300	5719200	7476400	1794700	7514300	11269000	18420000	513660	2059500	8992900	7256200	9322900	8992900	7256200	9322900	56554	serine/threonine-protein phosphatase 2B catalytic subunit alpha isoform-like isoform X2 [Carassius auratus]
796	1883	XP_026115747.1	7.76	28	8	8	Carbamidomethylation	56260000	49534000	39654000	56415000	67768000	48095000	42770000	45102000	56795000	39783000	51491000	46119000	67212000	62954000	45242000	37435000	30580000	25582000	38303000	38842000	31765000	25298000	25691000	34977000	29403000	31018000	31834000	36775000	45595000	34430000	55203000	48706000	56656000	34148000	29427000	35930000	56651	aldehyde dehydrogenase mitochondrial [Carassius auratus]
797	2638	XP_026081254.1	7.1	24	3	3	Acetylation (Protein N-term)	42174000	64218000	32351000	81408000	70877000	40646000	39042000	35630000	44983000	25693000	40145000	41817000	49656000	38600000	25902000	42174000	64218000	32351000	81408000	70877000	40646000	39042000	35630000	44983000	25693000	40145000	41817000	49656000	38600000	25902000	58206000	37199000	39224000	58206000	37199000	39224000	23867	ras-related protein Rab-6B-like isoform X4 [Carassius auratus]
798	2163	XP_026058477.1	2.78	9	2	2	Carbamidomethylation	3634100	6199900	2945300	11077000	10350000	4346400	4145600	4009800	7392800	3512800	3921500	1743900	7208500	5184600	3302900	3634100	6199900	2945300	11077000	10350000	4346400	4145600	4009800	7392800	3512800	3921500	1743900	7208500	5184600	3302900	6841300	4681500	4979900	6841300	4681500	4979900	40301	guanine nucleotide-binding protein G(i) subunit alpha-1-like [Carassius auratus]
799	2177	XP_026081213.1	1.78	7	2	2	Carbamidomethylation	5985500	10221000	5676900	11237000	13499000	7008300	10020000	3614100	10325000	6151100	9167200	10340000	9525000	8578900	5288200	5985500	10221000	5676900	11237000	13499000	7008300	10020000	3614100	10325000	6151100	9167200	10340000	9525000	8578900	5288200	9323900	7423700	8579800	9323900	7423700	8579800	50677	elongation factor 1-gamma-like [Carassius auratus]
800	4040	XP_026052537.1	5.54	6	1	1		9582900	3983800	4007400	2847400	5037000	6838200	6819500	2328000	5998900	6093200	6623100	7524000	5776700	7727100	5580900	9582900	3983800	4007400	2847400	5037000	6838200	6819500	2328000	5998900	6093200	6623100	7524000	5776700	7727100	5580900	5091700	5615500	6646400	5091700	5615500	6646400	15083	profilin-2-like isoform X1 [Carassius auratus]
801	2465	XP_026146418.1	11.9	16	6	6		52040000	34679000	30065000	28656000	39614000	38553000	31538000	28764000	39114000	35273000	39640000	40813000	41213000	48618000	45284000	37025000	22608000	22813000	19492000	26970000	27307000	20826000	20798000	28271000	25963000	28117000	28275000	28945000	36263000	34815000	37745000	34825000	44091000	25781000	24633000	31283000	50129	trifunctional enzyme subunit beta mitochondrial-like [Carassius auratus]
802	3426	XP_026051985.1	7.36	19	2	2	Carbamidomethylation	8225300	9591700	0	22121000	12466000	8467900	8986900	8718900	5254600	5457500	8196100	2838800	10792000	8977300	6438600	8225300	9591700	0	22121000	12466000	8467900	8986900	8718900	5254600	5457500	8196100	2838800	10792000	8977300	6438600	15971000	8457800	9174400	15971000	8457800	9174400	22154	peroxiredoxin-1 [Carassius auratus]
803	3211	XP_026062667.1	3.61	15	3	3	Acetylation (Protein N-term)	98819000	55372000	40945000	65415000	56965000	64597000	51756000	29567000	46666000	54524000	60889000	48311000	48412000	65426000	55822000	93401000	49799000	39593000	64749000	52972000	59577000	44619000	28295000	41123000	52571000	55657000	45735000	35531000	64507000	55490000	63503000	49422000	55772000	60103000	45237000	51384000	22124	peroxiredoxin-1-like [Carassius auratus]
804	2502	XP_026137998.1	11.15	4	1	1		1554400	1970100	1202100	0	2690000	1116200	955530	1190100	1496000	482240	1016900	1209100	1505300	604650	340770	1554400	1970100	1202100	0	2690000	1116200	955530	1190100	1496000	482240	1016900	1209100	1505300	604650	340770	1854100	1048000	935350	1854100	1048000	935350	46542	lissencephaly-1 homolog A [Carassius auratus]
805	2464	XP_026136991.1	2.37	2	1	1		355690	161620	325640	0	96182	524910	528820	334050	122980	160770	537260	322330	490560	111640	411880	355690	161620	325640	0	96182	524910	528820	334050	122980	160770	537260	322330	490560	111640	411880	234780	334310	374740	234780	334310	374740	94040	heat shock 70 kDa protein 4-like [Carassius auratus]
806	1621	XP_026144141.1	0.13	23	9	9	Carbamidomethylation	33759000	32808000	24711000	21747000	33711000	32991000	38589000	19212000	32160000	18326000	30094000	41356000	37337000	20133000	14267000	19628000	22734000	13621000	14479000	21308000	24005000	25237000	10692000	24076000	14161000	21092000	30801000	23049000	16075000	10064000	30681000	29021000	31522000	18354000	19634000	21481000	58409	26S proteasome non-ATPase regulatory subunit 3-like [Carassius auratus]
807	7832	XP_026123453.1	3.25	31	6	6	Carbamidomethylation	788660000	548310000	372450000	777500000	1182800000	674320000	561030000	317720000	726650000	564270000	512070000	396910000	672250000	655820000	392880000	658780000	486530000	319430000	700140000	1052600000	588190000	501000000	281980000	640170000	468780000	446470000	338150000	605710000	532750000	324350000	735040000	569420000	528020000	643490000	496020000	449480000	12978	CD59 glycoprotein-like [Carassius auratus]
808	4359	XP_026097936.1	2.7	32	5	5	Carbamidomethylation	90140000	56418000	59396000	50163000	62315000	74312000	61842000	46848000	61403000	69061000	67603000	77772000	53228000	94727000	78310000	65991000	43711000	41358000	34919000	44980000	55366000	49762000	33423000	48101000	46120000	51290000	58505000	40246000	57708000	49937000	63687000	62693000	74328000	46192000	46554000	51537000	24574	60S ribosomal protein L10-like [Carassius auratus]
809	2736	XP_026133238.1	2.63	7	1	1		5744900	3698900	2974000	3475300	11232000	5029500	6943400	3289500	9589700	5092000	4752100	5452100	10263000	8077900	5678400	5744900	3698900	2974000	3475300	11232000	5029500	6943400	3289500	9589700	5092000	4752100	5452100	10263000	8077900	5678400	5424900	5988800	6844700	5424900	5988800	6844700	21423	ras-related C3 botulinum toxin substrate 3-like isoform X2 [Carassius auratus]
810	3360	XP_026104000.1	3.81	20	6	6	Carbamidomethylation	27269000	27301000	18563000	31111000	29832000	25792000	30773000	20797000	33122000	15856000	32717000	30254000	25970000	5214800	5256000	19895000	11626000	14368000	15843000	15835000	18364000	17141000	14487000	20417000	12591000	21725000	20475000	11216000	3408900	3455900	26815000	25268000	22643000	15513000	16600000	12056000	37667	serine/threonine-protein phosphatase 2A activator-like [Carassius auratus]
811	1481	XP_026080022.1	2.78	1	1	1		63469	2014600	1068000	1759700	3297800	2406100	3310100	2188000	3047800	960940	2128000	2338400	5383500	694600	568870	63469	2014600	1068000	1759700	3297800	2406100	3310100	2188000	3047800	960940	2128000	2338400	5383500	694600	568870	1640700	2382600	2222700	1640700	2382600	2222700	150003	eukaryotic translation initiation factor 3 subunit A-like isoform X2 [Carassius auratus]
812	2942	XP_026122362.1	5.8	6	4	4		16646000	17995000	16897000	30587000	28465000	19881000	11432000	9924100	20379000	16743000	16248000	15394000	15977000	27974000	14232000	15683000	17359000	15728000	28393000	27370000	18582000	10485000	8969900	19499000	15147000	15549000	14895000	15618000	25461000	12401000	23076000	17239000	18689000	21865000	16104000	17510000	134842	probable serine/threonine-protein kinase kinX isoform X1 [Carassius auratus]
813	4691	XP_026063958.1	1.41	15	3	3		1886700	20734000	7981300	18411000	19759000	1827400	17657000	5410800	12563000	5573100	16080000	13785000	17474000	4983100	4311100	172530	19452000	6290900	16145000	17384000	751760	17108000	5342600	10842000	4629800	14843000	13240000	17317000	3659700	3737700	15774000	13059000	13529000	13908000	12188000	12761000	25809	rho GDP-dissociation inhibitor 2-like isoform X1 [Carassius auratus]
814	5337	XP_026140628.1	5.94	66	7	7		496690000	297580000	227500000	276570000	330310000	446080000	409250000	160200000	382670000	295090000	424190000	409120000	521040000	399540000	295990000	474070000	277470000	215170000	241020000	305440000	429850000	388120000	145310000	365730000	281570000	407600000	395900000	499480000	378520000	283490000	328970000	340990000	412000000	302640000	322110000	394000000	10016	acyl-CoA-binding domain-containing protein 7-like [Carassius auratus]
815	1227	XP_026111116.1	7.05	32	11	11	Carbamidomethylation	54451000	42467000	29378000	37177000	47347000	46023000	45365000	31834000	51498000	31867000	48940000	49656000	60702000	27225000	33711000	31027000	12936000	16488000	10631000	15208000	27005000	21744000	14126000	27015000	19809000	25900000	28387000	30888000	17593000	22698000	44089000	43547000	48158000	18973000	21940000	26126000	61658	stress-induced-phosphoprotein 1 [Carassius auratus]
816	3414	XP_026120918.1	3.98	10	1	1		866850	2999600	236510	1964700	1938300	1987600	3890000	2281100	2630300	71810	2059400	2326700	73096	140250	72245	866850	2999600	236510	1964700	1938300	1987600	3890000	2281100	2630300	71810	2059400	2326700	73096	140250	72245	1601200	2172200	934340	1601200	2172200	934340	20385	ADP-ribosylation factor 4-like [Carassius auratus]
817	2482	XP_026062703.1	16.24	5	1	1		1297500	912300	1290800	833760	841780	0	0	0	0	317820	776240	1233100	1050900	954780	564470	1297500	912300	1290800	833760	841780	0	0	0	0	317820	776240	1233100	1050900	954780	564470	1035200	317820	915880	1035200	317820	915880	36584	annexin A13-like [Carassius auratus]
819	2041	XP_026139543.1	0.54	17	4	4	Carbamidomethylation	36951000	19585000	22617000	14903000	17897000	33545000	19849000	10915000	18867000	21758000	22287000	23416000	29328000	24935000	15011000	34895000	19337000	21276000	14490000	16988000	33474000	18796000	10462000	18228000	20086000	21761000	22435000	28789000	22757000	13487000	26738000	25508000	26739000	25744000	24730000	25590000	55356	succinate-semialdehyde dehydrogenase mitochondrial-like [Carassius auratus]
820	3590	XP_026058800.1	1.55	6	1	1		3152200	2348600	2107700	1780000	0	3533400	2921200	1281900	3133100	2656300	2968600	2963300	2676700	1910800	2737500	3152200	2348600	2107700	1780000	0	3533400	2921200	1281900	3133100	2656300	2968600	2963300	2676700	1910800	2737500	2347100	2705200	2651400	2347100	2705200	2651400	21425	GTPase KRas [Carassius auratus]
821	4737	XP_026146251.1	5.81	16	3	3	Carbamidomethylation; Acetylation (Protein N-term)	34735000	20745000	19145000	28841000	19676000	23641000	18032000	9840800	22295000	6207100	23191000	31524000	16865000	12582000	21838000	34735000	20745000	19145000	28841000	19676000	23641000	18032000	9840800	22295000	6207100	23191000	31524000	16865000	12582000	21838000	24628000	18586000	24455000	24628000	18586000	24455000	29881	elongation factor 1-delta-like isoform X5 [Carassius auratus]
822	2735	XP_026121667.1	4.69	7	1	1		12198000	6660100	5639100	6719900	15198000	9215300	13189000	4745000	15332000	9758500	8751100	12583000	14662000	14285000	10638000	12198000	6660100	5639100	6719900	15198000	9215300	13189000	4745000	15332000	9758500	8751100	12583000	14662000	14285000	10638000	9283200	10448000	12184000	9283200	10448000	12184000	21399	ras-related C3 botulinum toxin substrate 3 [Carassius auratus]
823	2425	XP_026104891.1	3.71	5	1	1		2565800	1278500	1421600	541570	1164100	1564100	1684000	2485800	1770700	817050	1513400	2723800	656240	613070	319340	2565800	1278500	1421600	541570	1164100	1564100	1684000	2485800	1770700	817050	1513400	2723800	656240	613070	319340	1394300	1664300	1165200	1394300	1664300	1165200	45344	RNA-binding protein Nova-1-like isoform X2 [Carassius auratus]
824	6521	XP_026089288.1	1.61	14	3	3	Carbamidomethylation	38907000	38884000	42306000	29811000	28991000	43528000	30844000	38348000	51048000	43774000	38642000	36178000	41532000	28838000	43878000	21399000	32279000	20165000	22895000	21255000	25067000	22812000	26429000	35148000	18213000	21980000	23187000	37661000	11927000	15568000	35780000	41508000	37814000	23598000	25534000	22065000	45918	secernin-2-like [Carassius auratus]
825	5351	XP_026109815.1	0.26	8	1	1		17879000	13081000	8525400	3433200	12824000	14539000	18440000	3798900	16746000	9958400	15026000	9951700	19096000	6764100	4850600	17879000	13081000	8525400	3433200	12824000	14539000	18440000	3798900	16746000	9958400	15026000	9951700	19096000	6764100	4850600	11149000	12697000	11138000	11149000	12697000	11138000	13439	V-type proton ATPase subunit G 1-like [Carassius auratus]
826	2790	XP_026118481.1	0.31	20	7	7	Carbamidomethylation	30677000	30519000	24354000	27302000	35775000	31182000	29869000	23635000	27872000	22015000	28437000	34060000	33958000	19593000	22779000	21598000	25121000	14771000	18868000	24659000	22845000	25247000	18453000	21243000	13679000	22312000	27499000	29091000	11517000	12128000	29725000	27189000	27765000	21003000	20293000	20509000	52875	26S proteasome non-ATPase regulatory subunit 12-like [Carassius auratus]
827	2544	XP_026068718.1	9.8	9	2	2		11084000	6744600	8461700	9249600	7944100	6008200	7218500	7209800	7105100	6499300	4226600	7392200	7210600	7932700	6808700	11084000	6744600	8461700	9249600	7944100	6008200	7218500	7209800	7105100	6499300	4226600	7392200	7210600	7932700	6808700	9331300	6808200	7732000	9331300	6808200	7732000	44638	dynactin subunit 2-like isoform X1 [Carassius auratus]
828	3276	XP_026116079.1	5.46	18	5	5		37761000	33821000	24040000	43250000	45537000	34223000	30431000	20732000	34951000	25523000	31653000	33030000	33060000	36565000	21821000	33783000	29883000	20520000	37717000	39700000	27670000	25864000	17934000	29227000	22239000	26378000	27964000	29947000	30417000	18337000	37277000	29172000	31769000	32321000	24587000	26609000	40174	NSFL1 cofactor p47-like [Carassius auratus]
830	4705	XP_026109996.1	1.25	26	4	4		2194200000	2996300000	2742700000	3412400000	3377200000	2795500000	3340700000	2459400000	3466200000	2051800000	2590900000	2610600000	2278200000	6340200000	3146100000	1984200000	2819400000	2558900000	3211200000	3071000000	2499000000	2903100000	2293500000	3099300000	1815100000	2400500000	2342700000	1925400000	6010200000	2976300000	2945300000	2823500000	3395200000	2729700000	2522700000	3133000000	15573	hemoglobin subunit alpha [Carassius auratus]
831	1980	XP_026137162.1	1.02	8	2	2	Carbamidomethylation	233320	684030	388290	1349200	1406300	609280	782050	457920	1001700	169070	470930	568610	1754200	219190	172120	233320	684030	388290	1349200	1406300	609280	782050	457920	1001700	169070	470930	568610	1754200	219190	172120	1195400	792070	873600	1195400	792070	873600	60898	alanine aminotransferase 2-like isoform X1 [Carassius auratus]
832	4449	XP_026146926.1	9.35	4	1	1		3205400	2744900	44816	0	0	2230700	2599000	601600	0	0	0	266620	106010	0	0	3205400	2744900	44816	0	0	2230700	2599000	601600	0	0	0	266620	106010	0	0	1998400	1810400	186320	1998400	1810400	186320	23308	myelin protein P0 isoform X2 [Carassius auratus]
833	2521	XP_026109028.1	8.01	2	1	1	Carbamidomethylation	0	147900	0	239490	425190	787680	691960	175160	211800	0	929820	441780	614380	0	0	0	147900	0	239490	425190	787680	691960	175160	211800	0	929820	441780	614380	0	0	270860	466650	662000	270860	466650	662000	103320	heterogeneous nuclear ribonucleoprotein U-like protein 1 isoform X1 [Carassius auratus]
834	2870	XP_026063033.1	5.23	3	1	1		3449300	0	526140	1078300	113780	2312000	3064300	2665400	3436500	1726700	3254800	1327200	2644900	2823200	3237500	3449300	0	526140	1078300	113780	2312000	3064300	2665400	3436500	1726700	3254800	1327200	2644900	2823200	3237500	1291900	2641000	2657500	1291900	2641000	2657500	50727	coronin-1A-like [Carassius auratus]
835	2213	XP_026058752.1	1.49	10	6	6		13541000	12355000	7542400	10439000	13038000	13632000	11526000	8399100	13097000	7321400	11892000	9432500	11094000	8021100	6076500	10753000	8398000	6261400	8072800	9070700	10598000	8789100	6995500	9308800	4597800	9002200	7520500	8950800	6955100	5812300	11967000	12002000	10012000	8810500	8449800	7648200	109321	116 kDa U5 small nuclear ribonucleoprotein component [Carassius auratus]
836	4909	XP_026091713.1	0.11	13	2	2	Acetylation (Protein N-term)	299300000	233780000	298230000	175060000	251160000	217670000	271330000	313160000	252630000	192690000	245630000	229110000	285940000	205130000	237940000	233780000	110820000	245100000	119350000	153870000	155550000	139130000	196590000	155630000	166040000	161680000	157100000	90930000	185410000	216330000	252090000	249870000	241690000	172580000	162590000	162290000	20102	cold-inducible RNA-binding protein B-like [Carassius auratus]
837	5140	XP_026063193.1	7.02	7	1	1		1351000	871440	1203000	863070	2029400	818240	1453400	644960	1361500	117080	754480	1297400	538000	843520	691720	1351000	871440	1203000	863070	2029400	818240	1453400	644960	1361500	117080	754480	1297400	538000	843520	691720	1263600	879040	825020	1263600	879040	825020	27449	THO complex subunit 4-like isoform X1 [Carassius auratus]
838	2539	XP_026095028.1	8.97	23	7	7	Carbamidomethylation	31961000	33849000	27079000	38634000	41207000	29027000	33489000	22649000	38389000	29834000	35632000	34688000	51625000	32061000	37213000	22089000	24152000	19368000	30103000	28571000	20858000	21618000	19490000	23768000	20952000	23548000	24111000	32334000	20698000	27808000	34835000	31196000	38244000	24857000	21337000	25700000	49247	sulfide:quinone oxidoreductase mitochondrial-like [Carassius auratus]
839	2797	XP_026071600.1	6.55	37	9	9	Carbamidomethylation	228760000	62357000	30521000	57892000	259170000	154640000	35830000	28220000	115990000	98758000	44895000	32404000	53996000	58711000	33719000	113310000	46982000	15373000	34335000	177820000	91661000	27093000	19203000	82058000	36152000	31714000	23601000	42460000	22955000	12197000	148080000	98882000	48112000	77565000	51233000	26585000	27584	histone H3-like [Carassius auratus]
840	2011	XP_026123363.1	0.39	25	8	8	Carbamidomethylation	38278000	37010000	33337000	30992000	37381000	35027000	36109000	32586000	33644000	24502000	42488000	34194000	43760000	25186000	29836000	24337000	21611000	23043000	17256000	16926000	22267000	20690000	23297000	14860000	17322000	23636000	20691000	22558000	13789000	21192000	37492000	35739000	37809000	20635000	20495000	20373000	68081	alpha-ketoglutarate-dependent dioxygenase FTO-like [Carassius auratus]
841	5342	XP_026090097.1	8.38	23	6	6		37674000	26574000	26164000	49934000	46424000	25307000	26398000	25525000	28442000	22702000	25147000	17626000	30494000	28015000	21839000	31766000	21296000	22813000	40693000	37536000	22023000	21995000	20492000	23872000	20769000	20860000	14856000	19955000	27445000	21559000	37572000	25950000	26811000	30821000	21830000	20935000	22985	high mobility group protein B3-like [Carassius auratus]
842	16394	XP_026105422.1	10.14	10	2	2		2817200000	3620100000	2334400000	5718200000	5074700000	2310200000	2247800000	2213400000	2766200000	2295900000	2115900000	2448000000	2684100000	3973200000	2652800000	2815000000	3617200000	2332200000	5718200000	5074700000	2310200000	2247500000	2213400000	2766200000	2288200000	2115800000	2448000000	2683900000	3939700000	2631600000	3913300000	2367100000	2777500000	3911500000	2365100000	2763800000	24065	ependymin-2 [Carassius auratus]
843	4218	XP_026091872.1	3.12	4	1	1		2517700	1174300	1759800	1605000	1896700	2176700	2151500	404290	1907300	1459900	2007100	2514700	1465100	2528700	1785900	2517700	1174300	1759800	1605000	1896700	2176700	2151500	404290	1907300	1459900	2007100	2514700	1465100	2528700	1785900	1790700	1619900	2060300	1790700	1619900	2060300	42150	guanine nucleotide-binding protein G(q) subunit alpha-like isoform X3 [Carassius auratus]
844	5125	XP_026132132.1	0.05	32	4	4		134150000	199940000	95364000	115450000	129690000	131120000	174210000	148860000	138590000	79302000	139650000	139460000	234740000	85197000	88472000	134150000	199940000	95364000	115450000	129690000	131120000	174210000	148860000	138590000	77950000	139650000	139460000	234740000	81505000	85386000	134920000	135500000	139540000	134920000	134140000	136150000	22246	cold-inducible RNA-binding protein-like [Carassius auratus]
845	3341	XP_026074374.1	0.26	16	6	6	Carbamidomethylation	14690000	12955000	7143500	14371000	16053000	17344000	17634000	8041700	17747000	8242400	16801000	15713000	17525000	7385000	8991800	10307000	8639400	6574500	14086000	12480000	10698000	10993000	7397600	13479000	6140000	11875000	10714000	12670000	6379400	8286300	14579000	13802000	14108000	10991000	9741600	9985100	61204	UDP-glucuronosyltransferase-like [Carassius auratus]
846	2040	XP_026091105.1	0.52	5	1	1	Carbamidomethylation	1559200	2420300	1539200	4037300	3885200	2276500	2664300	2010000	2957300	1680400	2559400	2802300	2991700	2521000	1586400	1559200	2420300	1539200	4037300	3885200	2276500	2664300	2010000	2957300	1680400	2559400	2802300	2991700	2521000	1586400	2688200	2317700	2492200	2688200	2317700	2492200	35162	guanine nucleotide-binding protein subunit beta-2-like 1 [Carassius auratus]
847	1856	XP_026079835.1	4.49	11	4	4	Acetylation (Protein N-term)	9591800	13807000	7396200	9684500	11253000	8166000	10924000	7407100	8322600	7738100	8769900	7353300	13340000	5777900	4421400	9229400	12350000	6534900	9238500	10079000	7075900	10131000	7049300	8128400	7384500	7940100	6795200	12981000	5368100	4227300	10346000	8511600	8333900	9486300	7953800	7863700	45110	neurofilament light polypeptide-like [Carassius auratus]
848	3131	XP_026055207.1	4.47	3	2	2		2795000	2634200	1868600	5324100	5273800	2431600	2341100	2032900	3565100	1504600	2942200	2584900	4254100	1663000	675390	2795000	2634200	1868600	5324100	5273800	2431600	2341100	2032900	3565100	1504600	2942200	2584900	4254100	1663000	675390	3762000	2434000	2532700	3762000	2434000	2532700	99766	band 4.1-like protein 1 isoform X7 [Carassius auratus]
849	2617	XP_026098284.1	8.33	6	3	3		15731000	13360000	8502800	24806000	21141000	9755900	9727300	8085300	12135000	10405000	10128000	7949500	12045000	19076000	11363000	15731000	13360000	8502800	24806000	21141000	9755900	9727300	8085300	12135000	10405000	10128000	7949500	12045000	19076000	11363000	17065000	10022000	12112000	17065000	10022000	12112000	67497	dolichyl-diphosphooligosaccharide--protein glycosyltransferase subunit 1-like [Carassius auratus]
850	4444	XP_026146917.1	13.89	5	1	1		44948000	31467000	26793000	36575000	38452000	32182000	20212000	14374000	23955000	26322000	23434000	21113000	12252000	34764000	22890000	44948000	31467000	26793000	36575000	38452000	32182000	20212000	14374000	23955000	26322000	23434000	21113000	12252000	34764000	22890000	35647000	23409000	22890000	35647000	23409000	22890000	25045	myelin protein P0 isoform X1 [Carassius auratus]
851	2377	XP_026089493.1	5.22	3	1	1	Carbamidomethylation	2217100	2259700	1410200	1240400	2757600	3077800	4847600	921470	4113000	2597200	3800900	4796200	0	2135200	1923400	2217100	2259700	1410200	1240400	2757600	3077800	4847600	921470	4113000	2597200	3800900	4796200	0	2135200	1923400	1977000	3111400	3163900	1977000	3111400	3163900	80808	septin-9-like isoform X1 [Carassius auratus]
852	5850	XP_026102030.1	8.76	64	5	5	Carbamidomethylation; Acetylation (Protein N-term)	83415000	43128000	54127000	71226000	81114000	57977000	45670000	50299000	56894000	42396000	59458000	46844000	49915000	64463000	46511000	66029000	28069000	38148000	60769000	57955000	37673000	35020000	36844000	35498000	29184000	38120000	36287000	39872000	44132000	36020000	67863000	50647000	54759000	50194000	34844000	38886000	9086	40S ribosomal protein S21 isoform X1 [Carassius auratus]
853	2657	XP_026086467.1	0.04	7	2	2	Carbamidomethylation	4734400	4258700	3231700	3883000	3559300	4393900	5324500	2125900	5128800	3592500	5046100	5478900	2610600	3516800	3200500	4734400	4258700	3231700	3883000	3559300	4393900	5324500	2125900	5128800	3592500	5046100	5478900	2610600	3516800	3200500	3933400	4113100	4161700	3933400	4113100	4161700	43060	cathepsin D-like [Carassius auratus]
854	5303	XP_026108133.1	2.4	13	4	4		75282000	30004000	45974000	60907000	47706000	57608000	48217000	32494000	57018000	55993000	52878000	58589000	48581000	67121000	55601000	75149000	28476000	44926000	59321000	46505000	57264000	45591000	30704000	55147000	55611000	51463000	56451000	44929000	67121000	55601000	56691000	50266000	57698000	55592000	48863000	55297000	37671	uncharacterized protein LOC113080123 [Carassius auratus]
855	3187	XP_026063814.1	5.65	19	4	4		54181000	40449000	30566000	46240000	45888000	37370000	33157000	27855000	40584000	39619000	40816000	34230000	37163000	49268000	35921000	47525000	35136000	26268000	46240000	45888000	34258000	29770000	23512000	34484000	33322000	34208000	29556000	37163000	40408000	29970000	45633000	35717000	40784000	40211000	31069000	34261000	27232	LIM and SH3 domain protein 1-like [Carassius auratus]
856	1728	XP_026064044.1	1.08	12	9	9	Carbamidomethylation	22149000	19586000	13429000	22992000	22473000	19428000	20039000	11965000	22645000	15447000	20288000	21578000	20525000	16472000	14776000	12980000	12027000	6824700	11706000	14808000	12149000	11037000	6021600	13785000	9341500	11981000	10952000	10732000	10316000	7190300	20298000	19108000	20037000	11669000	10467000	10234000	137239	liprin-alpha-3-like [Carassius auratus]
857	2524	XP_026077760.1	0.11	20	5	5	Carbamidomethylation	23414000	17454000	10835000	15144000	24907000	17161000	21310000	11024000	21044000	9823900	18324000	17322000	26744000	10193000	9660900	21208000	12379000	9115600	8353900	18201000	13333000	16265000	8297700	17450000	8772800	15080000	14254000	18616000	8810800	8580700	18609000	16694000	19129000	13851000	13120000	14592000	46436	eukaryotic initiation factor 4A-III-like [Carassius auratus]
858	2074	XP_026076737.1	14.13	5	2	2		1664900	3286300	962850	580190	839650	3370200	2193100	726220	3257300	1584100	3139500	3030800	3803500	0	0	1664900	3286300	962850	580190	839650	3370200	2193100	726220	3257300	1584100	3139500	3030800	3803500	0	0	2240900	2575000	3324600	2240900	2575000	3324600	122692	sodium-driven chloride bicarbonate exchanger-like isoform X1 [Carassius auratus]
859	5110	XP_026051203.1	8.94	23	4	4	Oxidation (M)	77009000	64802000	50629000	108490000	99309000	54693000	48053000	51107000	61358000	55375000	49420000	46738000	64981000	93175000	54359000	64822000	53879000	42312000	88006000	80883000	46079000	40855000	42436000	51742000	46785000	41129000	44658000	56515000	75965000	44026000	80047000	54691000	61864000	65980000	46153000	52588000	22884	high mobility group protein B3-like [Carassius auratus]
860	4662	XP_026115072.1	2.35	10	2	2		26274000	21131000	11642000	12641000	19309000	18210000	20079000	5720000	18582000	15256000	18566000	20697000	22512000	15705000	16555000	26274000	21131000	11642000	12641000	19309000	18210000	20079000	5720000	18582000	15256000	18566000	20697000	22512000	15705000	16555000	19404000	15884000	19187000	19404000	15884000	19187000	24561	elongation factor 1-beta-like [Carassius auratus]
861	5333	XP_026062483.1	1.36	66	7	7	Carbamidomethylation; Acetylation (Protein N-term)	15451000	27150000	9829000	19575000	15606000	15298000	29733000	12809000	22949000	9087900	18819000	12043000	48703000	7799200	4170900	10461000	17283000	4813500	11691000	10639000	7537800	19158000	7704400	11078000	3437300	10346000	7692800	23916000	4069700	2547900	20687000	19730000	22434000	11575000	10450000	10361000	16803	eukaryotic translation initiation factor 5A-1-like [Carassius auratus]
862	1864	XP_026103914.1	10.21	9	4	4		9514200	9258900	7062500	20711000	17841000	4797400	5831000	9330900	7457800	6871200	8542800	3627400	11096000	14748000	8930400	9514200	8596400	7062500	19665000	16282000	4797400	4582600	8129000	7055700	6871200	8117400	2406000	8095000	14748000	8930400	13313000	7547800	10498000	12224000	6597000	8949100	66376	lamin-B2-like [Carassius auratus]
863	3392	XP_026076741.1	0.64	47	7	7	Carbamidomethylation	58388000	42037000	29521000	66284000	42647000	52711000	35216000	42280000	33010000	26812000	40364000	46847000	42509000	44636000	52844000	44799000	27736000	25358000	39055000	25135000	39747000	26011000	35040000	25709000	22835000	26024000	33435000	24209000	29487000	34095000	53916000	42936000	50634000	33003000	30523000	32189000	34624	26S proteasome non-ATPase regulatory subunit 14 [Carassius auratus]
864	2589	XP_026075194.1	1.16	8	1	1		1382500	459720	697830	115290	281930	1238400	766650	514350	274140	680610	1098100	865140	304010	324040	803050	1382500	459720	697830	115290	281930	1238400	766650	514350	274140	680610	1098100	865140	304010	324040	803050	587450	694830	678870	587450	694830	678870	22356	ras-related protein Rab-1A-like [Carassius auratus]
865	5077	XP_026130882.1	4.37	14	2	2	Carbamidomethylation	9558800	11056000	4494200	18064000	12826000	7061500	10375000	5171500	7187000	5572300	8667800	5248400	9482400	10633000	7301000	9558800	11056000	4494200	18064000	12826000	7061500	10375000	5171500	7187000	5572300	8667800	5248400	9482400	10633000	7301000	11200000	7073600	8266600	11200000	7073600	8266600	21213	cell division control protein 42 homolog isoform X1 [Carassius auratus]
866	2462	XP_026117012.1	2.91	11	4	4	Carbamidomethylation	5252600	3125000	3818100	6615200	9333700	6312300	2827700	3184700	4556700	5643200	4555100	4319400	3742900	8342800	5183200	5161600	2218400	3685100	5845700	7691400	3877500	2112900	2761600	3674500	5460600	3799000	2779700	3742900	8342800	4872700	5978200	4504900	5735000	5269700	3577400	4866200	69429	acyl-CoA dehydrogenase family member 9 mitochondrial-like [Carassius auratus]
867	2549	XP_026071222.1	3.1	5	1	1	Carbamidomethylation	5055600	5221000	3118400	5739500	7603100	6734800	5752500	4643700	7815600	4197000	5762300	7419700	2965300	3618600	3268100	5055600	5221000	3118400	5739500	7603100	6734800	5752500	4643700	7815600	4197000	5762300	7419700	2965300	3618600	3268100	5347500	5828700	4606800	5347500	5828700	4606800	64396	vesicular glutamate transporter 2.1-like [Carassius auratus]
868	4233	XP_026078044.1	8.29	14	4	4		50496000	41925000	52980000	37571000	46762000	47911000	43333000	52682000	43258000	45551000	44187000	50199000	58739000	56097000	58708000	50469000	41246000	52840000	35848000	45668000	47506000	42840000	51879000	42916000	45434000	43891000	50041000	56997000	55944000	58708000	45947000	46828000	54494000	45214000	46396000	53907000	54808	fumarate hydratase mitochondrial isoform X1 [Carassius auratus]
869	3057	XP_026123176.1	3.27	11	8	8	Carbamidomethylation	14344000	8184800	10128000	15821000	15302000	12926000	14586000	10181000	12970000	8109200	12603000	8066800	18347000	9243000	9195300	10442000	5631400	7445200	11845000	13137000	9517800	9445900	7315800	9643700	6536900	8545300	4737700	9154100	8168800	6425200	13358000	12413000	13109000	9700100	8795800	7569300	84926	cysteine--tRNA ligase cytoplasmic-like isoform X2 [Carassius auratus]
870	2852	XP_026073194.1	3.25	8	3	3	Carbamidomethylation	4111200	3692800	2077900	2691500	6347600	4644600	4883500	3887400	10071000	3347000	7574300	8136200	13093000	1502300	2607800	4111200	3692800	2077900	2691500	6347600	4644600	4883500	3887400	10071000	3347000	7574300	8136200	13093000	1502300	2607800	5994200	6969400	8245000	5994200	6969400	8245000	122020	sodium-driven chloride bicarbonate exchanger-like [Carassius auratus]
871	5212	XP_026076624.1	0.7	23	7	7		72932000	58941000	39400000	38092000	67735000	62699000	82119000	43111000	75244000	43340000	68921000	73147000	73291000	54408000	45285000	51325000	46315000	30168000	26702000	50725000	46946000	67975000	36166000	57121000	27573000	53390000	58157000	61106000	28169000	25946000	56517000	62003000	66365000	41047000	47668000	46865000	34885	heterogeneous nuclear ribonucleoprotein A1-like isoform X3 [Carassius auratus]
872	3612	XP_026114813.1	4.06	39	5	5	Carbamidomethylation	388640000	286600000	295610000	481700000	508700000	343930000	184700000	258150000	369910000	332720000	280780000	261610000	355660000	432020000	303630000	362250000	266230000	275750000	426330000	475050000	322370000	170740000	241640000	350310000	314320000	265010000	254360000	339600000	400460000	283940000	393280000	319500000	327480000	361120000	300860000	308680000	23457	uncharacterized protein C7orf57 homolog isoform X1 [Carassius auratus]
873	3690	XP_026135035.1	2.27	39	7	7	Carbamidomethylation	28033000	33789000	20872000	43994000	50871000	26134000	37944000	21734000	32591000	18908000	29189000	30131000	48314000	22956000	19588000	17458000	25466000	14697000	35155000	37538000	19303000	25253000	15826000	27678000	11761000	20971000	23514000	31269000	15658000	11024000	40075000	34935000	34137000	27049000	19964000	20487000	30427	proteasome subunit beta type-1-B-like [Carassius auratus]
874	3885	XP_026121619.1	3.14	14	2	2	Carbamidomethylation; Acetylation (Protein N-term)	14600000	11252000	10893000	11295000	16011000	12748000	10440000	9127000	16619000	14491000	11972000	14942000	14435000	19141000	12485000	14600000	11252000	10893000	11295000	16011000	12748000	10440000	9127000	16619000	14491000	11972000	14942000	14435000	19141000	12485000	12810000	13150000	16145000	12810000	13150000	16145000	29664	microtubule-associated protein RP/EB family member 3-like [Carassius auratus]
875	6172	XP_026071590.1	8.01	10	2	2		52141000	42649000	35307000	89491000	56913000	38580000	37833000	41441000	44376000	32513000	38819000	18655000	35953000	46566000	33487000	37029000	17394000	27450000	55217000	33194000	22893000	12305000	18909000	21604000	26120000	20474000	8526100	5540600	38163000	27421000	55300000	38949000	35085000	34057000	20366000	20414000	15128	astrocytic phosphoprotein PEA-15-like [Carassius auratus]
876	1423	XP_026077912.1	0.72	7	5	5		1595100	3566700	2076600	8153800	6725400	3691600	4719000	2548200	3470800	1933500	3997200	4607200	7172100	4908300	4429900	768500	3332200	1969400	6200700	6033700	3467700	4419700	2227400	2954200	1933500	3039600	2922200	6153900	3831500	1904600	5215600	3340600	5165100	4076200	3000500	3712500	116562	vinculin-like isoform X2 [Carassius auratus]
877	1790	XP_026078974.1	1.06	17	9	9	Carbamidomethylation	22160000	27065000	25798000	39422000	34676000	36533000	28376000	22053000	45129000	17881000	41073000	25745000	63279000	8934400	20315000	17867000	17672000	20756000	24998000	13546000	30119000	20726000	12949000	35708000	14474000	35855000	20471000	52256000	7894200	18609000	34835000	35807000	37856000	21896000	27177000	29883000	106219	eukaryotic translation initiation factor 3 subunit C isoform X2 [Carassius auratus]
878	2574	XP_026088161.1	0.14	7	1	1	Carbamidomethylation	544000	2565100	0	660600	1167500	1252900	353960	1201800	1312600	993990	0	1567000	1857300	501460	439440	544000	2565100	0	660600	1167500	1252900	353960	1201800	1312600	993990	0	1567000	1857300	501460	439440	1234300	1023100	1091300	1234300	1023100	1091300	38250	glycerol-3-phosphate dehydrogenase [NAD(+)] cytoplasmic-like isoform X1 [Carassius auratus]
879	4189	XP_026063882.1	3.24	15	3	3		6393300	15316000	14638000	20229000	21431000	15495000	21649000	20990000	24800000	13869000	28457000	35442000	41018000	13577000	9924500	6393300	15316000	14638000	20229000	21431000	15495000	21649000	20990000	24800000	13869000	28457000	35442000	41018000	13577000	9924500	15601000	19565000	25684000	15601000	19565000	25684000	45264	2' 3'-cyclic-nucleotide 3'-phosphodiesterase-like [Carassius auratus]
880	2700	XP_026132168.1	0.94	7	2	2		2270900	2660500	1189600	1660600	2258700	893650	3068000	2317500	2104400	615750	2768400	3247700	5055300	467290	1060600	2270900	2660500	1189600	1660600	2258700	893650	3068000	2317500	2104400	615750	2768400	3247700	5055300	467290	1060600	2008100	2011200	2808300	2008100	2011200	2808300	42157	protein phosphatase 1B-like isoform X2 [Carassius auratus]
881	2037	XP_026141981.1	1.07	6	2	2	Acetylation (Protein N-term)	5345600	4712700	2477500	1343600	876770	4549200	3478800	3156800	1493600	2656400	5391700	2884500	3947200	1782700	2876400	5345600	4712700	2477500	1343600	876770	4549200	3478800	3156800	1493600	2656400	5391700	2884500	3947200	1782700	2876400	3176700	3326200	3657400	3176700	3326200	3657400	55066	UTP--glucose-1-phosphate uridylyltransferase isoform X2 [Carassius auratus]
882	2350	XP_026070264.1	1.76	3	1	1		7751700	2137200	4078200	1482900	3699800	5504700	4162100	1482200	5194500	6064900	5104800	7038800	2238500	5539600	4354700	7751700	2137200	4078200	1482900	3699800	5504700	4162100	1482200	5194500	6064900	5104800	7038800	2238500	5539600	4354700	3829900	4481700	4855300	3829900	4481700	4855300	65940	glutamate decarboxylase 1-like isoform X1 [Carassius auratus]
883	2887	XP_026119118.1	0.01	1	1	1		308040	1304400	0	1466500	1975600	415320	1621200	1032900	1513300	0	598850	649740	2968300	0	0	308040	1304400	0	1466500	1975600	415320	1621200	1032900	1513300	0	598850	649740	2968300	0	0	1263600	1145700	1405600	1263600	1145700	1405600	145860	band 4.1-like protein 1 isoform X9 [Carassius auratus]
884	5129	XP_026103902.1	11.87	7	1	1	Carbamidomethylation	418440	791500	0	1795200	0	0	3287100	0	4469500	0	1894500	1902700	4190500	2483100	1046600	418440	791500	0	1795200	0	0	3287100	0	4469500	0	1894500	1902700	4190500	2483100	1046600	1001700	3878300	2303500	1001700	3878300	2303500	31204	heterogeneous nuclear ribonucleoprotein A0-like [Carassius auratus]
885	1923	XP_026075949.1	4.34	3	1	1		0	491470	786110	1343800	1496300	0	226660	363120	1126900	977220	0	673280	786790	3585500	1610100	0	491470	786110	1343800	1496300	0	226660	363120	1126900	977220	0	673280	786790	3585500	1610100	1029400	673470	1663900	1029400	673470	1663900	93938	AP2-associated protein kinase 1-like isoform X2 [Carassius auratus]
886	1962	XP_026120108.1	2.35	18	9	9	Carbamidomethylation	29067000	35954000	24763000	26401000	31921000	37349000	36006000	32384000	31061000	23915000	34785000	32246000	40804000	18129000	18915000	24979000	29189000	20947000	22439000	22871000	30778000	29999000	24730000	22821000	19337000	28401000	22945000	26676000	14548000	16198000	30760000	34162000	30170000	24085000	25756000	21754000	65052	mitochondrial import receptor subunit TOM70-like [Carassius auratus]
887	1983	XP_026090009.1	14.63	5	2	2	Carbamidomethylation	9130100	231090	6225000	26686000	9527600	9856300	8973100	7842000	12310000	6267600	10731000	13669000	18458000	13727000	17498000	9130100	231090	6225000	26686000	9527600	9856300	8973100	7842000	12310000	6267600	10731000	13669000	18458000	13727000	17498000	12828000	9090500	14985000	12828000	9090500	14985000	94432	heat shock 70 kDa protein 4-like [Carassius auratus]
888	2879	XP_026084605.1	7.03	35	5	5		34215000	20539000	12566000	20466000	25779000	29444000	28451000	13856000	30202000	18897000	22290000	25456000	25910000	25222000	23867000	25178000	18633000	12566000	17337000	21641000	21896000	19686000	10214000	22742000	18897000	20267000	23909000	23727000	24477000	21466000	25141000	25541000	25735000	19071000	18687000	22769000	33704	syntaxin-12-like isoform X1 [Carassius auratus]
889	5718	XP_026069875.1	1.85	18	2	2	Carbamidomethylation	9835600	13165000	12326000	10760000	24264000	10047000	6244600	13328000	23002000	18056000	6768100	9056000	9803800	13729000	21096000	6326600	5730900	12326000	6279400	17352000	10047000	6244600	10942000	18040000	17036000	6768100	6049600	0	13639000	21096000	15187000	15251000	16188000	9603100	12462000	11888000	24593	elongation factor 1-beta-like [Carassius auratus]
890	2481	XP_026106859.1	5.48	10	2	2	Carbamidomethylation	817150	2521300	4115300	4462200	2369100	4531000	2443300	1050500	4036700	4602000	3968300	2373900	4927600	5586600	5506900	817150	2521300	4115300	4462200	2369100	4531000	2443300	1050500	4036700	4602000	3968300	2373900	4927600	5586600	5506900	2979300	3332700	4697400	2979300	3332700	4697400	61859	methylcrotonoyl-CoA carboxylase beta chain mitochondrial-like [Carassius auratus]
891	2859	XP_026062305.1	1.08	6	1	1		1777900	1430200	896970	1815300	1392000	1142300	1353800	1409000	2373800	298790	1024000	1510900	2047600	0	0	1777900	1430200	896970	1815300	1392000	1142300	1353800	1409000	2373800	298790	1024000	1510900	2047600	0	0	1462500	1315500	1527500	1462500	1315500	1527500	42485	septin-2B-like isoform X1 [Carassius auratus]
892	5231	XP_026076146.1	9.02	7	1	1	Carbamidomethylation	23945000	11534000	12023000	7831000	29160000	19701000	38823000	9999300	33987000	19521000	28419000	26979000	49477000	21548000	27655000	23945000	11534000	12023000	7831000	29160000	19701000	38823000	9999300	33987000	19521000	28419000	26979000	49477000	21548000	27655000	17231000	24749000	30816000	17231000	24749000	30816000	23295	high mobility group-T protein-like [Carassius auratus]
893	3502	XP_026065546.1	3.55	8	2	2	Acetylation (Protein N-term)	10502000	27079000	13904000	45667000	34838000	17941000	19272000	17742000	19428000	12698000	14892000	7125300	22359000	19755000	11544000	10502000	27079000	13904000	45667000	34838000	17941000	19272000	17742000	19428000	12698000	14892000	7125300	22359000	19755000	11544000	28079000	18470000	16195000	28079000	18470000	16195000	74599	microtubule-associated protein tau-like isoform X2 [Carassius auratus]
894	1236	XP_026068351.1	5.75	6	4	4	Carbamidomethylation	8209000	10191000	2878900	10943000	11785000	7090900	6037800	4429400	8067600	2605600	3913700	4227500	8232000	2794700	3681300	7384800	9897800	2128700	10279000	11033000	6072400	6037800	4243900	7665600	2008900	3807400	3233000	7879300	1579400	2821000	9549000	6215600	5951400	8892200	5664900	5245600	105958	AP-1 complex subunit beta-1 isoform X4 [Carassius auratus]
895	3608	XP_026132614.1	5.16	7	2	2		1870500	66072	1401200	1073100	1694600	1962600	1944200	1688100	1828400	2782600	1405000	2584700	3112700	4793000	1819200	1870500	66072	1401200	1073100	1694600	1962600	1944200	1688100	1828400	2782600	1405000	2584700	3112700	4793000	1819200	1824600	2551500	3895800	1824600	2551500	3895800	55371	TOM1-like protein 2 isoform X2 [Carassius auratus]
896	2762	XP_026106074.1	3.35	17	5	5		54291000	45488000	15806000	28937000	47542000	52785000	65500000	20302000	59781000	28458000	49355000	64568000	98211000	37215000	31526000	44123000	36077000	13031000	23304000	39367000	42303000	52053000	17015000	49336000	24153000	39398000	53155000	79023000	31021000	26928000	38939000	46431000	60079000	31478000	38038000	49581000	56593	4F2 cell-surface antigen heavy chain-like [Carassius auratus]
897	4920	XP_026073045.1	10	6	1	1		1008400	1139800	1243200	2706600	2537500	826470	816780	543460	1329900	907110	1280500	1636800	1834900	1253500	654760	1008400	1139800	1243200	2706600	2537500	826470	816780	543460	1329900	907110	1280500	1636800	1834900	1253500	654760	1727100	884740	1332100	1727100	884740	1332100	28517	THO complex subunit 4-like [Carassius auratus]
898	2309	XP_026055140.1	6.36	24	9	9	Carbamidomethylation	33923000	20381000	18829000	21781000	23087000	31407000	31110000	15781000	33720000	27255000	28548000	29003000	36923000	33338000	27795000	23049000	14456000	12943000	9925400	9741300	20991000	18297000	7481000	21451000	20756000	15675000	19333000	16667000	24562000	19113000	26307000	28641000	32292000	14801000	17795000	20039000	59615	glucose-6-phosphate 1-dehydrogenase-like isoform X2 [Carassius auratus]
900	3826	XP_026100823.1	4.08	6	1	1		4275700	1999100	1254600	3194500	4760700	2398400	2414400	1715400	2469800	3463200	2639000	352420	276700	3439800	1985400	4275700	1999100	1254600	3194500	4760700	2398400	2414400	1715400	2469800	3463200	2639000	352420	276700	3439800	1985400	3096900	2492200	1738700	3096900	2492200	1738700	21354	GTPase NRas [Carassius auratus]
901	2072	XP_026085838.1	1.77	14	4	4		22979000	21259000	10574000	14665000	22585000	17750000	26207000	11768000	21560000	12767000	23795000	27509000	32576000	14047000	12823000	21856000	19265000	9833900	13076000	19225000	16923000	23663000	10676000	19159000	12714000	21619000	26207000	28956000	13401000	12481000	18769000	19419000	25787000	17008000	18036000	24170000	61812	bifunctional epoxide hydrolase 2-like [Carassius auratus]
902	5866	XP_026053398.1	0.09	8	1	1		0	1119700	2771000	2813500	3710600	0	2387100	1972500	3698900	2370100	2475000	4562600	2613400	1123500	2815600	0	1119700	2771000	2813500	3710600	0	2387100	1972500	3698900	2370100	2475000	4562600	2613400	1123500	2815600	2603700	2607100	2718000	2603700	2607100	2718000	44146	dual specificity mitogen-activated protein kinase kinase 2 [Carassius auratus]
903	2910	XP_026112461.1	4.4	5	3	3		38241000	9316500	29302000	147660000	22171000	53974000	54194000	48651000	61576000	29253000	54362000	79053000	74357000	46110000	51076000	37104000	9316500	29302000	136260000	22171000	51244000	52071000	48651000	61576000	29253000	51358000	74573000	64103000	45029000	49582000	64728000	53346000	60992000	58460000	50920000	56929000	82748	electrogenic sodium bicarbonate cotransporter 1-like isoform X2 [Carassius auratus]
905	2441	XP_026085131.1	1.09	8	2	2	Carbamidomethylation	19291000	13606000	7711300	16069000	22596000	12849000	19370000	12175000	21733000	8114000	15748000	18580000	31694000	3745800	3420000	19291000	13606000	7711300	16069000	22596000	12849000	19370000	12175000	21733000	8114000	15748000	18580000	31694000	3745800	3420000	16899000	14848000	15298000	16899000	14848000	15298000	52006	dihydrolipoyllysine-residue succinyltransferase component of 2-oxoglutarate dehydrogenase complex mitochondrial-like [Carassius auratus]
906	7369	XP_026067808.1	2.6	19	2	2		8763600	7058400	9383100	2174200	4639800	6002300	7015200	8595000	5490800	7070100	6091000	4843800	6135600	5580000	7644000	8763600	7058400	9383100	2174200	4639800	6002300	7015200	8595000	5490800	7070100	6091000	4843800	6135600	5580000	7644000	7190800	6834700	6760900	7190800	6834700	6760900	19702	tubulin polymerization-promoting protein family member 3-like [Carassius auratus]
907	5353	XP_026068569.1	0.22	15	6	6	Carbamidomethylation	15041000	27969000	10644000	34306000	45718000	20193000	31666000	15711000	35010000	16681000	25928000	29684000	44647000	19189000	12084000	12374000	21800000	8812400	26455000	35820000	16083000	22656000	11476000	27828000	14163000	20337000	22526000	30633000	16553000	10398000	27302000	24477000	28346000	21052000	18441000	20089000	57784	vesicular inhibitory amino acid transporter-like [Carassius auratus]
908	3349	XP_026092136.1	2.54	6	1	1		5605000	8449500	2726900	5948800	7454700	4499500	6279100	3783200	5865200	2901300	5308400	4234600	7793200	3447200	1693400	5605000	8449500	2726900	5948800	7454700	4499500	6279100	3783200	5865200	2901300	5308400	4234600	7793200	3447200	1693400	6037000	4665700	4495400	6037000	4665700	4495400	17334	ubiquitin-conjugating enzyme E2 N-like [Carassius auratus]
909	4425	XP_026064752.1	4.56	7	3	3	Acetylation (Protein N-term)	51481000	23707000	29463000	36393000	36475000	31628000	26839000	16293000	29864000	31822000	31591000	25366000	21869000	44446000	32275000	41290000	14131000	24689000	32315000	27853000	22212000	14727000	12278000	18665000	27265000	21474000	15671000	7997700	42131000	30536000	35504000	27289000	31109000	28056000	19029000	23562000	40125	hsc70-interacting protein [Carassius auratus]
910	3409	XP_026078642.1	2	6	2	2		3964100	2993400	3110800	2895400	3846800	4338200	3040700	4292800	2735100	3667500	3753000	3761000	3134600	5717700	3085000	3964100	2993400	3110800	2895400	3846800	4338200	3040700	4292800	2735100	3667500	3753000	3761000	3134600	5717700	3085000	3362100	4072100	4467100	3362100	4072100	4467100	57227	TOM1-like protein 2 isoform X2 [Carassius auratus]
911	2682	XP_026097926.1	5.23	4	1	1		187920	1863200	743820	413360	1556100	2183100	1584100	1642900	1288100	0	1428500	922480	3045100	0	0	187920	1863200	743820	413360	1556100	2183100	1584100	1642900	1288100	0	1428500	922480	3045100	0	0	952890	1674600	1798700	952890	1674600	1798700	43265	sarcolemmal membrane-associated protein-like isoform X3 [Carassius auratus]
912	4468	XP_026069789.1	0.8	27	5	5		32684000	26231000	21965000	15903000	18121000	28388000	27488000	28148000	18562000	17507000	26444000	24932000	25510000	12445000	18367000	28710000	23654000	18212000	11854000	16700000	25656000	23970000	23669000	15914000	14073000	23915000	22739000	22068000	9994600	13924000	23853000	24725000	22949000	19826000	20656000	18728000	23072	proteasome subunit beta type-3 [Carassius auratus]
913	2755	XP_026146889.1	6.06	5	3	3		11725000	12128000	7365500	5535000	7485400	15439000	9772300	10231000	11539000	4091300	12268000	15657000	15456000	6878400	17654000	11725000	12128000	7365500	5535000	7485400	15439000	9772300	10231000	11539000	4091300	12268000	15657000	15456000	6878400	17654000	10978000	12858000	17197000	10978000	12858000	17197000	178692	LOW QUALITY PROTEIN: A-kinase anchor protein 12-like [Carassius auratus]
915	3432	XP_026123458.1	2.85	16	4	4		19020000	35176000	22235000	18961000	28881000	38745000	36370000	27906000	22862000	23276000	25128000	50859000	37138000	9196200	10232000	17209000	33219000	21706000	18226000	27227000	36134000	34143000	27124000	20054000	22135000	22199000	47597000	32169000	9196200	9849800	26612000	31716000	36692000	25275000	29802000	33807000	49709	rho GTPase-activating protein 1-like [Carassius auratus]
916	5348	XP_026146454.1	6.3	41	4	4	Carbamidomethylation	64063000	54804000	31086000	65272000	75663000	41617000	49065000	33126000	41430000	35816000	50888000	39342000	50513000	41509000	31907000	62313000	54804000	30503000	64208000	73317000	40668000	49065000	32730000	40859000	35081000	50024000	39342000	50398000	41509000	30732000	58465000	41091000	43119000	57029000	40429000	42401000	14863	fatty acid-binding protein brain-like [Carassius auratus]
917	5343	XP_026140466.1	4.04	39	5	5	Acetylation (Protein N-term)	511700000	585260000	295260000	718370000	577370000	443500000	466220000	395860000	440990000	382720000	359890000	131300000	404390000	602300000	450510000	495780000	571600000	294480000	706510000	569640000	432510000	457090000	389410000	434790000	366230000	353410000	126620000	398650000	575950000	429540000	539150000	426070000	390180000	527600000	416000000	376830000	12784	myelin basic protein-like [Carassius auratus]
918	3394	XP_026077411.1	0.98	8	1	1	Carbamidomethylation	6913000	3992900	274690	3067000	3051700	4698300	5596100	477150	5405800	1397900	6297400	5288500	10931000	3481700	583190	6913000	3992900	274690	3067000	3051700	4698300	5596100	477150	5405800	1397900	6297400	5288500	10931000	3481700	583190	3459900	3515000	5316400	3459900	3515000	5316400	26478	proteasome subunit alpha type-5 [Carassius auratus]
919	3346	XP_026081803.1	2.41	20	3	3		33335000	27639000	19173000	21381000	28068000	33132000	35198000	19759000	32881000	24510000	33624000	36848000	34932000	24207000	22343000	33335000	27639000	19173000	21381000	28068000	33132000	35198000	19759000	32881000	24510000	33624000	36848000	34932000	24207000	22343000	25919000	29096000	30391000	25919000	29096000	30391000	33251	glyoxalase domain-containing protein 4-like [Carassius auratus]
920	2576	XP_026058324.1	0.05	9	8	8	Carbamidomethylation	61920000	46811000	40746000	31778000	55498000	58093000	46310000	30453000	43868000	45934000	35902000	42078000	64071000	47360000	32888000	43056000	27225000	24110000	18827000	31818000	36769000	29879000	17715000	29047000	26346000	23247000	32004000	43072000	25800000	20063000	49510000	44932000	47033000	29007000	27951000	28837000	146777	aggrecan core protein-like isoform X2 [Carassius auratus]
921	3307	XP_026130199.1	3.67	30	7	7	Carbamidomethylation	7661200	8181000	3107300	15866000	30911000	13744000	16436000	3534200	22605000	16401000	19335000	11285000	17192000	21048000	14363000	5250900	4910300	2315800	10634000	18652000	6900800	6357300	1518400	14291000	10782000	11911000	6570800	8357200	15614000	9691900	14979000	16754000	17659000	9145900	10180000	10429000	35632	annexin A4-like [Carassius auratus]
922	3143	XP_026110587.1	0.45	17	4	4	Carbamidomethylation; Acetylation (Protein N-term)	37190000	15454000	15568000	20136000	25585000	25450000	26327000	10414000	31908000	25657000	19956000	19933000	16832000	29721000	21490000	33590000	13389000	13145000	13616000	19259000	22941000	24996000	7821400	28423000	24176000	17602000	18118000	13776000	26293000	19171000	22786000	23951000	21586000	18600000	21671000	18992000	39805	neuronal migration protein doublecortin [Carassius auratus]
924	1668	XP_026065353.1	0.96	3	1	1		6203400	9151500	8745600	6747100	4808000	7209900	4814100	6936200	7470400	5375900	5913900	6413200	8476900	5501900	6171500	6203400	9151500	8745600	6747100	4808000	7209900	4814100	6936200	7470400	5375900	5913900	6413200	8476900	5501900	6171500	7131100	6361300	6495500	7131100	6361300	6495500	97672	coatomer subunit gamma-2-like [Carassius auratus]
925	5182	XP_026086533.1	3.37	21	2	2	Carbamidomethylation	1171800	5534500	1360500	3958000	8955200	2871700	8238300	1259100	10676000	873690	1862800	1325200	10764000	45356	328600	1171800	5534500	1360500	3958000	8955200	2871700	8238300	1259100	10676000	873690	1862800	1325200	10764000	45356	328600	4691700	5543300	3771300	4691700	5543300	3771300	16094	coactosin-like protein [Carassius auratus]
926	4985	XP_026118384.1	5.38	15	1	1		1046700	7484000	0	1327100	5631900	5257900	6440600	10735000	4882400	238610	6157300	5447400	8468700	0	0	1046700	7484000	0	1327100	5631900	5257900	6440600	10735000	4882400	238610	6157300	5447400	8468700	0	0	3872400	5510900	6691100	3872400	5510900	6691100	19462	probable peptidyl-tRNA hydrolase 2 [Carassius auratus]
927	3823	XP_026059284.1	9.15	24	3	3	Acetylation (Protein N-term)	11417000	5098200	6008000	7293200	6381100	10329000	9319900	9672700	8617500	8652100	9619400	8028500	16748000	11577000	11656000	11417000	5098200	6008000	7293200	6381100	10329000	9319900	9672700	8617500	8652100	9619400	8028500	16748000	11577000	11656000	7782500	9318300	11526000	7782500	9318300	11526000	18481	CB1 cannabinoid receptor-interacting protein 1-like [Carassius auratus]
929	6081	XP_026099845.1	1.91	24	4	4	Carbamidomethylation; Oxidation (M)	434920000	270340000	232940000	262870000	309320000	321720000	350870000	169940000	350190000	299510000	308560000	281020000	346900000	362120000	246920000	392540000	222330000	200280000	159840000	257110000	295830000	318290000	128920000	316220000	272710000	280600000	265280000	300570000	327960000	217520000	302260000	301440000	311860000	246420000	268860000	280910000	22943	peptidyl-prolyl cis-trans isomerase-like [Carassius auratus]
930	2143	XP_026135931.1	1.6	10	2	2		4194500	10016000	971350	7106800	11728000	3475900	3280600	4963500	5829900	2072000	2417400	2362800	9309500	2930100	1930600	4194500	10016000	971350	7106800	11728000	3475900	3280600	4963500	5829900	2072000	2417400	2362800	9309500	2930100	1930600	7883300	4209900	4542700	7883300	4209900	4542700	35009	guanine nucleotide-binding protein subunit beta-2-like 1 [Carassius auratus]
931	3476	XP_026112777.1	6.93	22	4	4	Carbamidomethylation	3612800	2931700	3133100	7909400	5599900	3446900	3736700	3311000	4160800	2957100	4385100	4469300	4567300	7453300	4148200	3088400	2627400	2952200	7735800	5224100	2827100	2253300	3019800	3514400	2957100	3692800	4318400	2318500	7324100	4042400	4913800	3674500	5004700	4602000	2914400	4339200	36810	protein FAM49A-like isoform X2 [Carassius auratus]
932	4788	XP_026122965.1	3.24	5	1	1	Carbamidomethylation	2001800	746800	41319	0	2145300	256340	3124100	102510	0	0	0	4284300	1076500	0	0	2001800	746800	41319	0	2145300	256340	3124100	102510	0	0	0	4284300	1076500	0	0	1233800	1161000	2680400	1233800	1161000	2680400	30950	calretinin-like [Carassius auratus]
933	3120	XP_026078471.1	2.3	8	1	1	Carbamidomethylation	971510	0	0	7015000	0	979770	2037700	0	0	0	3407600	2085900	3720100	1609300	0	971510	0	0	7015000	0	979770	2037700	0	0	0	3407600	2085900	3720100	1609300	0	3993300	1508800	2705700	3993300	1508800	2705700	42279	protein phosphatase 1B-like isoform X2 [Carassius auratus]
934	2995	XP_026112524.1	2.02	15	3	3		17520000	4468400	16856000	21130000	7933100	12240000	13478000	17064000	14540000	14585000	13828000	12711000	22094000	12810000	19439000	17520000	4468400	16856000	21130000	7933100	12240000	13478000	17064000	14540000	14585000	13828000	12711000	22094000	12810000	19439000	15565000	14381000	16176000	15565000	14381000	16176000	47480	non-POU domain-containing octamer-binding protein-like isoform X3 [Carassius auratus]
935	2138	XP_026053483.1	1.29	15	7	7	Carbamidomethylation	30222000	18577000	17108000	20133000	46751000	23129000	31695000	14442000	46406000	22424000	34665000	38790000	49482000	26522000	13507000	28030000	12716000	15087000	15042000	30624000	18874000	24746000	7207300	31094000	19852000	24565000	26508000	31687000	23931000	11738000	33899000	33749000	37806000	22222000	24769000	25247000	78577	long-chain-fatty-acid--CoA ligase 1-like [Carassius auratus]
936	2949	XP_026135479.1	1.98	28	7	7	Carbamidomethylation; Acetylation (Protein N-term)	21945000	21188000	16947000	16108000	30845000	21972000	24547000	22796000	25131000	15556000	22088000	13784000	28947000	19063000	17743000	19604000	16217000	15691000	12561000	24601000	19114000	19481000	17962000	17885000	13831000	17548000	10103000	18847000	15744000	16555000	23131000	22779000	24348000	17735000	17655000	17218000	54857	pre-mRNA-processing factor 19 [Carassius auratus]
937	3404	XP_026089303.1	0.89	8	1	1		0	971890	194480	476970	1557000	215690	2304300	1248300	1493400	0	483410	936970	3602000	0	161220	0	971890	194480	476970	1557000	215690	2304300	1248300	1493400	0	483410	936970	3602000	0	161220	800080	1315400	1295900	800080	1315400	1295900	28100	proteasome subunit alpha type-7-like isoform X2 [Carassius auratus]
938	5800	XP_026123239.1	5.47	37	7	7	Carbamidomethylation	86912000	69646000	67754000	85458000	115020000	73050000	63000000	69390000	82194000	69397000	73413000	70488000	99494000	85714000	88514000	65032000	59628000	55881000	52841000	85951000	58256000	41191000	54021000	64969000	59830000	54521000	56871000	73337000	73466000	77187000	95152000	75848000	87431000	70533000	59097000	69347000	29100	acidic leucine-rich nuclear phosphoprotein 32 family member A [Carassius auratus]
939	4390	XP_026145770.1	1.73	45	7	7	Acetylation (Protein N-term)	4823200000	4059600000	3531700000	4384700000	4835100000	3947400000	3713600000	2338200000	4412600000	4015900000	3752400000	4372000000	3393500000	5481900000	3607000000	4050700000	3262500000	2943000000	3166200000	3707300000	3318700000	3150900000	1855000000	3690700000	3354800000	3153600000	3724200000	2840000000	4389100000	2940500000	4329000000	3686000000	4121900000	3428100000	3074500000	3409900000	15453	myelin basic protein-like isoform X1 [Carassius auratus]
940	2853	XP_026061461.1	2.78	24	4	4	Carbamidomethylation	30646000	23258000	10855000	30452000	28914000	19454000	29137000	12210000	18152000	12343000	23718000	24621000	23241000	14350000	10820000	30646000	21909000	10855000	28387000	27001000	19454000	28001000	11244000	16765000	12343000	23396000	23991000	20173000	14350000	10820000	25923000	20104000	19886000	24147000	18941000	18546000	32780	biliverdin reductase A-like [Carassius auratus]
941	1881	XP_026066628.1	1.5	4	2	2	Carbamidomethylation	3466200	1595400	1966000	3377600	6321700	3611900	3726100	2815000	4628200	3987300	3388000	3611100	4799000	3323800	2850700	3466200	1595400	1966000	3377600	6321700	3611900	3726100	2815000	4628200	3987300	3388000	3611100	4799000	3323800	2850700	3646900	3936900	4189700	3646900	3936900	4189700	109922	squamous cell carcinoma antigen recognized by T-cells 3-like [Carassius auratus]
943	3220	XP_026144457.1	5.78	55	6	6	Acetylation (Protein N-term)	85868000	77170000	52990000	64029000	83178000	91213000	103960000	80200000	104400000	69654000	72527000	107230000	120240000	73214000	67920000	51121000	59447000	40114000	34302000	57729000	67971000	84050000	61369000	78883000	40249000	59852000	92980000	100150000	43202000	30747000	89626000	102410000	102010000	62039000	79032000	75428000	14844	fatty acid-binding protein heart-like [Carassius auratus]
944	3028	XP_026092633.1	3.76	4	1	1	Carbamidomethylation	5980100	6160600	5065400	11855000	10954000	4761600	6592100	4775200	6880800	6184400	5115600	6379700	5654000	9296500	6003100	5980100	6160600	5065400	11855000	10954000	4761600	6592100	4775200	6880800	6184400	5115600	6379700	5654000	9296500	6003100	8003000	5838800	6489800	8003000	5838800	6489800	53199	6-phosphogluconate dehydrogenase decarboxylating [Carassius auratus]
945	3386	XP_026130961.1	0.51	6	1	1		2290400	7637900	0	5392300	6570400	0	7311600	2330000	11218000	0	4020700	6127800	8787000	0	0	2290400	7637900	0	5392300	6570400	0	7311600	2330000	11218000	0	4020700	6127800	8787000	0	0	5472700	6953300	6311800	5472700	6953300	6311800	26449	proteasome subunit alpha type-5-like [Carassius auratus]
946	5660	XP_026075994.1	0.22	20	2	2		10460000	13320000	3608400	9393500	17587000	7631600	11448000	5435600	13147000	7997800	11170000	8677800	10837000	10641000	4896500	10460000	13320000	3608400	9393500	17587000	7631600	11448000	5435600	13147000	7997800	11170000	8677800	10837000	10641000	4896500	10874000	9132000	9538100	10874000	9132000	9538100	13680	cytochrome c oxidase subunit 5B mitochondrial-like [Carassius auratus]
947	6006	XP_026130115.1	1.29	20	2	2		12859000	17951000	5316700	20716000	28087000	11972000	13805000	7883100	15615000	9821400	12216000	10747000	16382000	14420000	7798900	12859000	17951000	5316700	20716000	28087000	11972000	13805000	7883100	15615000	9821400	12216000	10747000	16382000	14420000	7798900	16986000	11819000	12313000	16986000	11819000	12313000	13780	cytochrome c oxidase subunit 5B mitochondrial-like [Carassius auratus]
[truncated: 1,825 more rows]

## Sheet: Perseus_processed
Filtered, imputed and log2 transformed LFQ data
Explanation of columns
N: 5 days normoxia
A: 5 days anoxia
R: 5 days anoxia followed by 1 day reoxygenation
[truncated: 2,721 more rows]

## Sheet: significant_proteins
Differentially regulated proteins after applying ANOVA and Tukey's post-hoc test with FDR < 0.05, showing proteins with fold change > 2.
[truncated: 73 more rows]

[truncated: 2 more sheets: enrichment_analysis, PCA_loadings]
